# Supplementary material for: Carboxylation of terminal alkynes with CO2 catalyzed by imidazolium-bridged bis(phenolato) rare-earth metal complexes
Source: Royal Society of Chemistry journal article supplement (doi:10.1039/d2nj03130b), 2022-01-01
Supplement: d2nj03130b1.pdf [file d2nj03130b1.pdf]

# Carboxylation of terminal alkynes with CO<sub>2</sub> catalyzed by imidazolium-bridged bis(phenolato) rare-earth metal complexes

Kai Shi, Chengrong Lu\*, Bei Zhao\*

Key Laboratory of Organic Synthesis of Jiangsu Province, College of Chemistry, Chemical Engineering and Materials Science, Dushu Lake Campus, Soochow University, Suzhou 215123 (P. R. China)

## Contents

|                                                                                                                    |    |
|--------------------------------------------------------------------------------------------------------------------|----|
| Experimental section                                                                                               | 2  |
| Table S1. Screening of solvents and bases in carboxylation of phenylacetylene with CO <sub>2</sub>                 | 4  |
| Table S2. Optimization of three-component reaction of phenylacetylene, <i>n</i> -butyl bromide and CO <sub>2</sub> | 4  |
| Solid state structures of complexes <b>1-4</b>                                                                     | 5  |
| Crystallographic data for complexes <b>1-4</b>                                                                     | 7  |
| Characterization data of ligand and complexes <b>1-5</b>                                                           | 10 |
| NMR spectra of the complexes <b>1</b> and <b>5</b>                                                                 | 11 |
| Characterization data of the propiolic acids                                                                       | 13 |
| Characterization data of the esters of propiolic acids                                                             | 16 |
| NMR spectra of the propiolic acids                                                                                 | 18 |
| NMR spectra of the esters of propiolic acids                                                                       | 43 |
| References                                                                                                         | 50 |

## **Experimental section**

### **General procedures**

All manipulations involving air- and moisture-sensitive components were performed in a dry argon or carbon dioxide atmosphere using standard Schlenk techniques unless otherwise stated. All solvents were purchased and dried directly without purification prior to use. THF, toluene, and *n*-hexane were degassed and distilled from sodium benzophenone ketyl before use, while DMSO was dried using CaH<sub>2</sub> and CHCl<sub>3</sub> was treated by P<sub>4</sub>O<sub>10</sub>. Various liquid bases were also treated with dehydration and distilled before use. Commercial available terminal alkynes were used directly. The proligand H<sub>2</sub>LCl and rare-earth metal precursors RE[N(SiMe<sub>3</sub>)<sub>2</sub>]<sub>3</sub> were prepared according to the published method<sup>1-3</sup>. All NMR spectra were obtained on Bruker Ascend 400 spectrometer (400 MHz for <sup>1</sup>H and 101 MHz for <sup>13</sup>C) or Bruker Kalsruhe 300 spectrometer (300 MHz for <sup>1</sup>H and 75 MHz for <sup>13</sup>C). X-ray crystallographic data were obtained using a Bruker D8 QUEST CCD X-ray diffractometer or Rigaku Mercury CCD instrument. Data reduction was accomplished by the Bruker APEX program and refined by OLEX2 software. IR spectra were recorded with a VERTEX 70+HYPERION 2000 instrument. High-resolution mass spectra were obtained by Bruker ESI-TOF or Waters EI-GCT-TOF MS.

### **Typical procedure for the synthesis of imidazolium-bridged bis(phenolato) rare-earth metal complexes L<sub>3</sub>RE<sub>2</sub>Cl<sub>3</sub>**

To a Schlenk flask containing a THF solution of the ligand precursor H<sub>2</sub>LCl, a THF solution of RE[N(SiMe<sub>3</sub>)<sub>2</sub>]<sub>3</sub> was added and the reaction was stirred for 12 h at room temperature. After removal of the THF under reduced pressure, the HN(SiMe<sub>3</sub>)<sub>2</sub> was eliminated by washing with hexane three times. Crystals were obtained by recrystallisation in a mixture of THF-toluene or THF-hexane at room temperature.

### **General procedure for the reactions of terminal alkynes with CO<sub>2</sub> catalyzed by complex 1**

In a 5 mL Schlenk vial equipped with a magnetic stirrer, complex **1** (8.9 mg, 0.005 mmol) and Cs<sub>2</sub>CO<sub>3</sub> (325 mg, 1 mmol) were added, followed by the injection of

anhydrous DMSO (1 mL) using a syringe. After stirring for about 10 min, the argon gas in the flask was discharged three times with CO<sub>2</sub> immediately after the addition of terminal alkyne. Thereafter, CO<sub>2</sub> was introduced at ambient pressure using a balloon. The reaction mixture was stirred at 40 °C for 20 h. After cooling to room temperature, the reaction system was quenched by adding 10 mL of water. It was then acidified with the aqueous solution of hydrochloric acid (6 N, 10 mL) and extracted with ethyl ether (3 x 15 mL). The combined organic layer was washed with brine, dried with anhydrous sodium sulfate and filtered, and the crude acid was obtained after the removal of organic solvent under reduced pressure. The pure target product was obtained by flash column chromatography.

**General procedure for the one-pot three-component reaction of terminal alkynes, CO<sub>2</sub>, and alkyl halide catalyzed by complex 1**

In a 5 mL Schlenk vial equipped with a magnetic stirrer, complex **1** (8.9 mg, 0.005 mmol), Cs<sub>2</sub>CO<sub>3</sub> (325 mg, 1 mmol) and DMSO (1 mL) were added. After stirring for about 10 min, the terminal alkyne (0.5 mmol) and alkyl bromide (0.6 mmol) were added orderly with syringes, followed by the argon gas in the flask discharging with CO<sub>2</sub> three times. Thereafter, CO<sub>2</sub> was introduced at ambient pressure using a balloon. The reaction mixture was stirred at 50 °C for 30 h. After cooling to room temperature, the reaction system was quenched by adding 10 mL of water. It was then acidified with the dilute aqueous solution of hydrochloric acid (2 N, 10 mL) and extracted with ethyl ether (3 x 15 mL). The combined organic layer was washed with brine, dried with anhydrous sodium sulfate and filtered. The crude esters were obtained by concentration in vacuum. The pure esters were finally obtained by flash column chromatography (petroleum ether as eluent).

**Table S1. Screening of solvents and bases in carboxylation of phenylacetylene with CO<sub>2</sub><sup>a</sup>**

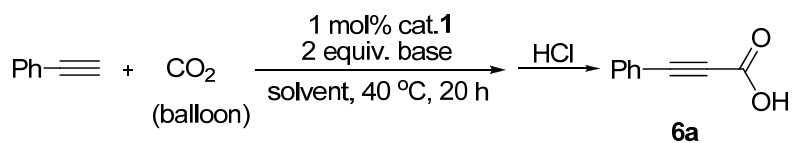

| Entry | Base                            | Solvent           | Yield <sup>b</sup> /% |
|-------|---------------------------------|-------------------|-----------------------|
| 1     | Cs <sub>2</sub> CO <sub>3</sub> | DMF               | 20                    |
| 2     | Cs <sub>2</sub> CO <sub>3</sub> | CHCl <sub>3</sub> | 12                    |
| 3     | Cs <sub>2</sub> CO <sub>3</sub> | THF               | 14                    |
| 4     | Cs <sub>2</sub> CO <sub>3</sub> | Tol               | -                     |
| 5     | Cs <sub>2</sub> CO <sub>3</sub> | DMSO              | 97                    |
| 6     | Na <sub>2</sub> CO <sub>3</sub> | DMSO              | -                     |
| 7     | K <sub>2</sub> CO <sub>3</sub>  | DMSO              | -                     |
| 8     | DBU                             | DMSO              | 30                    |
| 9     | TEA                             | DMSO              | 15                    |

<sup>a</sup> Reaction conditions: phenylacetylene (0.5 mmol), base (1.0 mmol), cat.1 (0.005 mmol), CO<sub>2</sub> (1 atm), solvent (1 mL), 20 h. <sup>b</sup> Isolated yields.

**Table S2. Optimization of three-component reaction of phenylacetylene, *n*-butyl bromide and CO<sub>2</sub><sup>a</sup>**

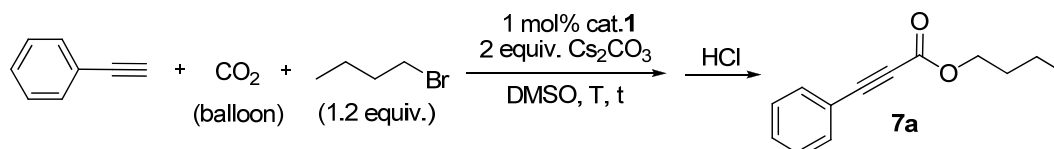

| Entry | t/h | T/°C | Yield <sup>b</sup> /% |
|-------|-----|------|-----------------------|
| 1     | 20  | 40   | 60                    |
| 2     | 20  | 50   | 72                    |
| 3     | 20  | 60   | 75                    |
| 4     | 20  | 80   | 76                    |
| 5     | 24  | 50   | 80                    |
| 6     | 30  | 50   | 96                    |
| 7     | 36  | 50   | 99                    |

<sup>a</sup>Reaction conditions: phenylacetylene (0.5 mmol), base (1.0 mmol), *n*-butyl bromide (0.6 mmol), cat.1 (0.005 mmol), CO<sub>2</sub> (1 atm), DMSO (1 mL). <sup>b</sup> Isolated yields.

## Solid state structures of complexes 1-4

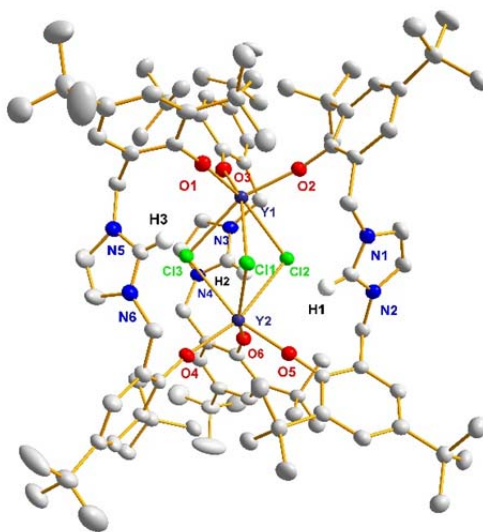

**Figure S1.** ORTEP view of complex **1·4THF** with ellipsoids at the 30% probability level.

Hydrogen atoms, except the H1, H2, H3 atoms are omitted for clarity.

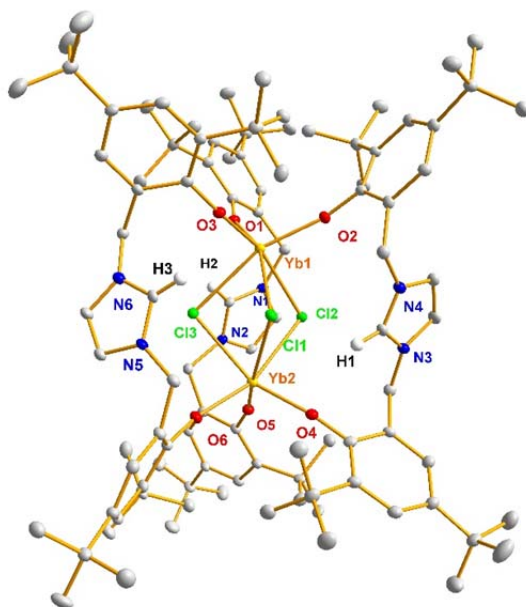

**Figure S2.** ORTEP view of complex **2·6THF** with ellipsoids at the 30% probability level.

Hydrogen atoms, except the H1, H2, H3 atoms are omitted for clarity.

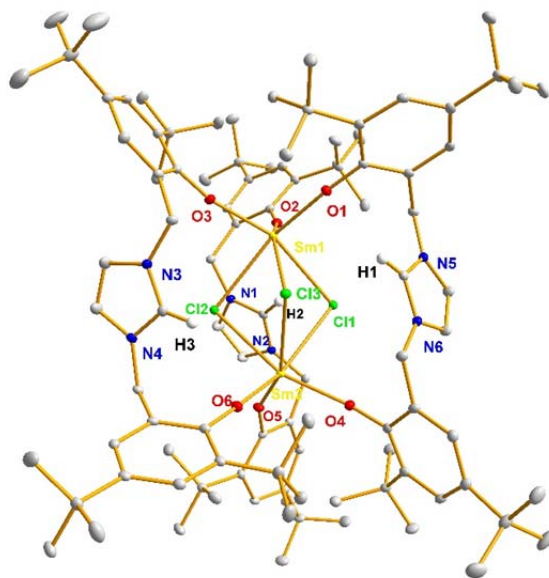

**Figure S3.** ORTEP view of complex **3·6THF** with ellipsoids at the 30% probability level.

Hydrogen atoms, except the H1, H2, H3 atoms are omitted for clarity.

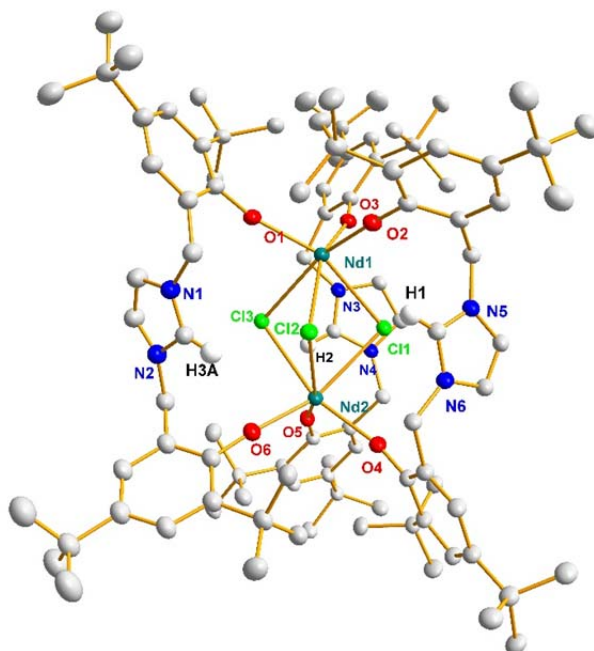

**Figure S4.** ORTEP view of complex **4·5.5THF** with ellipsoids at the 30% probability level.

Hydrogen atoms, except the H1, H2, H3A atoms are omitted for clarity.

### Crystallographic data for complexes 1-4

**Table S3. Crystallographic data and structure refinement details for complexes 1-4.**

|                                             | 1·4THF                                                                                          | 2·6THF                                                                                           | 3·6THF                                                                                           | 4·5.5THF                                                                                           |
|---------------------------------------------|-------------------------------------------------------------------------------------------------|--------------------------------------------------------------------------------------------------|--------------------------------------------------------------------------------------------------|----------------------------------------------------------------------------------------------------|
| Empirical formula                           | C <sub>115</sub> Cl <sub>3</sub> H <sub>173</sub> N <sub>6</sub> O <sub>10</sub> Y <sub>2</sub> | C <sub>123</sub> Cl <sub>3</sub> H <sub>189</sub> N <sub>6</sub> O <sub>12</sub> Yb <sub>2</sub> | C <sub>123</sub> Cl <sub>3</sub> H <sub>189</sub> N <sub>6</sub> O <sub>12</sub> Sm <sub>2</sub> | C <sub>121</sub> Cl <sub>3</sub> H <sub>185</sub> N <sub>6</sub> Nd <sub>2</sub> O <sub>11.5</sub> |
| Formula weight                              | 2083.75                                                                                         | 2396.22                                                                                          | 2350.84                                                                                          | 2302.57                                                                                            |
| Temperature/K                               | 119.96                                                                                          | 120.05                                                                                           | 119.99                                                                                           | 120.0                                                                                              |
| Crystal system                              | monoclinic                                                                                      | triclinic                                                                                        | monoclinic                                                                                       | monoclinic                                                                                         |
| Space group                                 | P2 <sub>1</sub> /c                                                                              | P-1                                                                                              | P2 <sub>1</sub> /c                                                                               | P2 <sub>1</sub> /n                                                                                 |
| a/Å                                         | 14.596(9)                                                                                       | 14.754(1)                                                                                        | 14.662(1)                                                                                        | 17.000(2)                                                                                          |
| b/Å                                         | 24.365(1)                                                                                       | 16.988(1)                                                                                        | 24.481(1)                                                                                        | 21.841(2)                                                                                          |
| c/Å                                         | 31.832(3)                                                                                       | 25.199(2)                                                                                        | 31.882(1)                                                                                        | 32.617(4)                                                                                          |
| α/°                                         | 90                                                                                              | 98.378(2)                                                                                        | 90                                                                                               | 90                                                                                                 |
| β/°                                         | 96.598(2)                                                                                       | 97.840(2)                                                                                        | 96.634(1)                                                                                        | 96.453(4)                                                                                          |
| γ/°                                         | 90                                                                                              | 100.313(2)                                                                                       | 90                                                                                               | 90                                                                                                 |
| Volume/Å <sup>3</sup>                       | 11246.3(8)                                                                                      | 6061.1(6)                                                                                        | 11366.9(9)                                                                                       | 12034(2)                                                                                           |
| Z                                           | 4                                                                                               | 2                                                                                                | 4                                                                                                | 4                                                                                                  |
| ρ <sub>calc</sub> g/cm <sup>3</sup>         | 1.231                                                                                           | 1.313                                                                                            | 1.374                                                                                            | 1.271                                                                                              |
| μ/mm <sup>-1</sup>                          | 1.156                                                                                           | 1.659                                                                                            | 1.157                                                                                            | 0.978                                                                                              |
| F(000)                                      | 4456.0                                                                                          | 2512.0                                                                                           | 4960.0                                                                                           | 4864.0                                                                                             |
| Crystal size/mm <sup>3</sup>                | 0.3 × 0.2 × 0.2                                                                                 | 0.3 × 0.2 × 0.1                                                                                  | 0.2 × 0.15 × 0.15                                                                                | 0.3 × 0.2 × 0.2                                                                                    |
| Radiation                                   | MoKα (λ = 0.71073)                                                                              | MoKα (λ = 0.71073)                                                                               | MoKα (λ = 0.71073)                                                                               | MoKα (λ = 0.71073)                                                                                 |
| 2θ range for data collection/°              | 3.392 to 55.034                                                                                 | 3.738 to 55.104                                                                                  | 3.942 to 55.006                                                                                  | 3.398 to 55.026                                                                                    |
| Index ranges                                | -18 ≤ h ≤ 18,<br>-31 ≤ k ≤ 31,<br>-41 ≤ l ≤ 41                                                  | -19 ≤ h ≤ 19,<br>-22 ≤ k ≤ 22,<br>-32 ≤ l ≤ 32                                                   | -19 ≤ h ≤ 19,<br>-31 ≤ k ≤ 31,<br>-41 ≤ l ≤ 41                                                   | -22 ≤ h ≤ 22,<br>-28 ≤ k ≤ 28,<br>-42 ≤ l ≤ 42                                                     |
| Reflections collected                       | 234999                                                                                          | 125271                                                                                           | 303288                                                                                           | 267931                                                                                             |
| Independent reflections                     | 25827<br>[R <sub>int</sub> = 0.1504,<br>R <sub>sigma</sub> = 0.0931]                            | 27523<br>[R <sub>int</sub> = 0.1224,<br>R <sub>sigma</sub> = 0.1092]                             | 26067<br>[R <sub>int</sub> = 0.0988,<br>R <sub>sigma</sub> = 0.0434]                             | 27573<br>[R <sub>int</sub> = 0.0982,<br>R <sub>sigma</sub> = 0.0490]                               |
| Data/restraints/parameters                  | 25827/0/1081                                                                                    | 27523/3510/1081                                                                                  | 26067/0/1081                                                                                     | 27573/2343/1081                                                                                    |
| Goodness-of-fit on F <sup>2</sup>           | 1.032                                                                                           | 1.038                                                                                            | 1.037                                                                                            | 1.026                                                                                              |
| Final R indexes [I ≥ 2σ (I)]                | R <sub>1</sub> = 0.0552,<br>wR <sub>2</sub> = 0.1075                                            | R <sub>1</sub> = 0.0578,<br>wR <sub>2</sub> = 0.1433                                             | R <sub>1</sub> = 0.0337,<br>wR <sub>2</sub> = 0.0838                                             | R <sub>1</sub> = 0.0389,<br>wR <sub>2</sub> = 0.0987                                               |
| Final R indexes [all data]                  | R <sub>1</sub> = 0.1007,<br>wR <sub>2</sub> = 0.1230                                            | R <sub>1</sub> = 0.0954,<br>wR <sub>2</sub> = 0.1606                                             | R <sub>1</sub> = 0.0516,<br>wR <sub>2</sub> = 0.0944                                             | R <sub>1</sub> = 0.0548,<br>wR <sub>2</sub> = 0.1095                                               |
| Largest diff. peak/hole / e Å <sup>-3</sup> | 0.53/-0.64                                                                                      | 2.10/-1.65                                                                                       | 1.24/-0.94                                                                                       | 1.32/-1.30                                                                                         |

**Table S4 Selected bond lengths (Å) and bond angles (°) for complex 1·4THF.**

| 1·4THF     |          |                  |           |
|------------|----------|------------------|-----------|
| Y(1)-O(1)  | 2.132(2) | Y(2)-Cl(2)       | 2.806(8)  |
| Y(1)-O(2)  | 2.132(2) | Y(2)-Cl(3)       | 2.781(5)  |
| Y(1)-O(3)  | 2.139(2) | Cl(3)-Y(1)-Cl(2) | 76.85(2)  |
| Y(1)-Cl(1) | 2.876(1) | O(2)-Y(1)-Cl(2)  | 82.90(6)  |
| Y(1)-Cl(2) | 2.795(2) | O(2)-Y(1)-O(1)   | 102.08(8) |
| Y(1)-Cl(3) | 2.785(2) | O(1)-Y(1)-Cl(3)  | 96.28(6)  |
| Y(2)-O(4)  | 2.111(2) | O(3)-Y(1)-Cl(1)  | 156.85(6) |
| Y(2)-O(5)  | 2.142(5) | Y(1)-Cl(1)-Y(2)  | 89.23(2)  |
| Y(2)-O(6)  | 2.161(6) | Y(1)-Cl(2)-Y(2)  | 90.98(2)  |
| Y(2)-Cl(1) | 2.811(6) | Y(1)-Cl(3)-Y(2)  | 91.72(2)  |

**Table S5 Selected bond lengths (Å) and bond angles (°) for complex 2·6THF.**

| 2·6THF      |          |                   |            |
|-------------|----------|-------------------|------------|
| Yb(1)-O(1)  | 2.125(4) | Yb(2)-Cl(2)       | 2.752(1)   |
| Yb(1)-O(2)  | 2.097(4) | Yb(2)-Cl(3)       | 2.730(2)   |
| Yb(1)-O(3)  | 2.110(4) | Cl(2)-Yb(1)-Cl(3) | 75.06(4)   |
| Yb(1)-Cl(1) | 2.760(2) | O(2)-Yb(1)-Cl(1)  | 98.60(12)  |
| Yb(1)-Cl(2) | 2.738(1) | O(2)-Yb(1)-O(1)   | 101.90(16) |
| Yb(1)-Cl(3) | 2.796(2) | O(1)-Yb(1)-Cl(3)  | 83.94(12)  |
| Yb(2)-O(4)  | 2.093(4) | O(3)-Yb(1)-Cl(2)  | 157.42(12) |
| Yb(2)-O(5)  | 2.103(4) | Yb(1)-Cl(1)-Yb(2) | 89.71(4)   |
| Yb(2)-O(6)  | 2.109(4) | Yb(1)-Cl(2)-Yb(2) | 91.53(4)   |
| Yb(2)-Cl(1) | 2.816(1) | Yb(1)-Cl(3)-Yb(2) | 90.76(4)   |



**Table S6 Selected bond lengths (Å) and bond angles ( ° ) for complex 3·6THF.**

| 3·6THF      |           |                   |           |
|-------------|-----------|-------------------|-----------|
| Sm(1)-O(1)  | 2.205(1)  | Sm(2)-Cl(2)       | 2.846(1)  |
| Sm(1)-O(2)  | 2.216(1)  | Sm(2)-Cl(3)       | 2.929(3)  |
| Sm(1)-O(3)  | 2.170(1)  | Cl(2)-Sm(1)-Cl(3) | 75.39 (3) |
| Sm(1)-Cl(1) | 2.859(1)  | O(2)-Sm(1)-Cl(2)  | 92.80(5)  |
| Sm(1)-Cl(2) | 2.841(1)  | O(1)-Sm(1)-O(2)   | 106.83(7) |
| Sm(1)-Cl(3) | 2.872(1)  | O(1)-Sm(1)-Cl(3)  | 82.82(5)  |
| Sm(2)-O(4)  | 2.191(1)  | O(3)-Sm(1)-Cl(1)  | 161.38(5) |
| Sm(2)-O(5)  | 2.199(1)  | Sm(1)-Cl(1)-Sm(2) | 90.19(1)  |
| Sm(2)-O(6)  | 2.191(1)  | Sm(1)-Cl(2)-Sm(2) | 90.77 (2) |
| Sm(2)-Cl(1) | 2.856 (4) | Sm(1)-Cl(3)-Sm(2) | 88.50(1)  |

**Table S7 Selected bond lengths (Å) and bond angles ( ° ) for complex 4·5.5THF.**

| 4·5.5THF    |           |                   |           |
|-------------|-----------|-------------------|-----------|
| Nd(1)-O(1)  | 2.221(2)  | Nd(2)-Cl(2)       | 2.915(2)  |
| Nd(1)-O(2)  | 2.225(2)  | Nd(2)-Cl(3)       | 2.877(1)  |
| Nd(1)-O(3)  | 2.226(2)  | Cl(2)-Nd(1)-Cl(3) | 75.90(2)  |
| Nd(1)-Cl(1) | 2.908(0)  | O(2)-Nd(1)-Cl(2)  | 85.98(6)  |
| Nd(1)-Cl(2) | 2.870(2)  | O(1)-Nd(1)-O(2)   | 100.45(8) |
| Nd(1)-Cl(3) | 2.889(6)  | O(1)-Nd(1)-Cl(3)  | 95.01(6)  |
| Nd(2)-O(4)  | 2.232(2)  | O(3)-Nd(1)-Cl(1)  | 160.83(6) |
| Nd(2)-O(5)  | 2.227(2)  | Nd(1)-Cl(1)-Nd(2) | 89.33(2)  |
| Nd(2)-O(6)  | 2.235(2)  | Nd(1)-Cl(2)-Nd(2) | 90.15(2)  |
| Nd(2)-Cl(1) | 2.919 (6) | Nd(1)-Cl(3)-Nd(2) | 90.53(2)  |

## Characterization data of ligand and complexes 1-5

**H<sub>2</sub>LCl:** White solid. <sup>1</sup>H NMR (400 MHz, DMSO-d<sub>6</sub>) δ 9.02 (s, 1H), 8.80 (s, 2H), 7.69 (d, *J* = 1.6 Hz, 2H), 7.23 (d, *J* = 2.4 Hz, 2H), 7.08 (d, *J* = 2.4 Hz, 2H), 5.50 (s, 4H), 1.34 (s, 18H), 1.21 (s, 18H) ppm.

**L<sub>3</sub>Y<sub>2</sub>Cl<sub>3</sub> (1):** Colorless crystals. Yield: 1.58 g (88%). Mp. 342.7–344.3 °C. Anal. Calcd for C<sub>99</sub>H<sub>141</sub>N<sub>6</sub>O<sub>6</sub>Cl<sub>3</sub>Y<sub>2</sub> (1792.81): C 66.23, H 7.92, N 4.68; Found: C 66.41, H 8.36, N 4.57. <sup>1</sup>H NMR (400 MHz, Tol-*d*<sub>8</sub>): δ 9.53 (s, 3H), 7.33 (s, 6H), 6.81 (s, 6H), 6.24 (d, *J* = 13.0 Hz, 6H), 5.70 (s, 6H), 3.61 (d, *J* = 13.0 Hz, 6H), 1.28 (s, 54H), 1.22 (s, 54H) ppm. <sup>13</sup>C{<sup>1</sup>H} NMR (101 MHz, Tol-*d*<sub>8</sub>) δ 161.73 (d, *J* = 5.1 Hz), 139.1, 137.9, 136.7, 125.0, 124.8, 122.8, 118.2, 52.9, 35.2, 33.8, 31.7, 30.2 ppm. IR (cm<sup>-1</sup>) ν 2951.3, 1467.5, 1438.3, 1359.4, 1290.9, 1274.1, 1128.4, 834.0, 794.6, 745.4, 643.3.

**L<sub>3</sub>Yb<sub>2</sub>Cl<sub>3</sub> (2):** Yellow crystals. Yield: 1.67 g (85%). Mp. 345.5–346.9 °C. Anal. Calcd for C<sub>107</sub>H<sub>157</sub>N<sub>6</sub>O<sub>8</sub>Cl<sub>3</sub>Yb<sub>2</sub> (2034.93): C 60.77, H 7.38, N 4.13; Found: C 60.54, H 7.88, N 3.85. IR (cm<sup>-1</sup>) ν 2951.0, 1465.2, 1438.5, 1359.5, 1292.6, 1275.1, 1132.5, 834.2, 792.9, 745.6, 643.3.

**L<sub>3</sub>Sm<sub>2</sub>Cl<sub>3</sub> (3):** Yellow crystals. Yield: 1.34 g (70%). Mp. 343.5–345.1 °C. Anal. Calcd for C<sub>107</sub>H<sub>157</sub>N<sub>6</sub>O<sub>8</sub>Cl<sub>3</sub>Sm<sub>2</sub> (2062.95): C 62.31, H 7.67, N 4.07; Found: C 62.53, H 8.16, N 4.01. IR (cm<sup>-1</sup>) ν 2951.7, 1464.2, 1438.4, 1359.7, 1292.9, 1275.4, 1131.3, 832.4, 792.1, 743.9, 643.7.

**L<sub>3</sub>Nd<sub>2</sub>Cl<sub>3</sub> (4):** Blue crystals. Yield: 1.23 g (65%). Mp. 347.5–349.2 °C. Anal. Calcd for C<sub>103</sub>H<sub>149</sub>N<sub>6</sub>O<sub>7</sub>Cl<sub>3</sub>Nd<sub>2</sub> (1970.87): C 62.54, H 7.59, N 4.25; Found: C 62.22, H 7.97, N 4.20. IR (cm<sup>-1</sup>) ν 2951.0, 1464.8, 1438.0, 1359.7, 1330.8, 1274.8, 1128.1, 831.2, 792.4, 743.0, 642.4.

**L<sub>3</sub>La<sub>2</sub>Cl<sub>3</sub> (5):** Colorless crystals. Yield: 1.04 g (55%). Mp. 346.3–347.8 °C. Anal. Calcd for C<sub>106</sub>H<sub>149</sub>N<sub>6</sub>O<sub>6</sub>Cl<sub>3</sub>La<sub>2</sub> (1984.87): C 64.06, H 7.56, N 4.23; Found: C 64.32, H 7.96, N 3.96. <sup>1</sup>H NMR (400 MHz, C<sub>6</sub>D<sub>6</sub>): δ 9.74 (s, 3H), 7.56 (d, *J* = 2.6 Hz, 6H), 6.97 (d, *J* = 2.5 Hz, 6H), 6.33 (d, *J* = 13.2 Hz, 6H), 5.78 (d, *J* = 1.5 Hz, 6H), 3.79 (d, *J* = 13.1 Hz, 6H), 1.58 (s, 54H), 1.37 (s, 54H) ppm. <sup>13</sup>C{<sup>1</sup>H} NMR (101 MHz, C<sub>6</sub>D<sub>6</sub>): δ 162.8, 138.3, 137.0, 136.4, 125.3, 124.8, 122.0, 118.6, 52.0, 35.1, 33.8, 31.7, 30.2 ppm. IR (cm<sup>-1</sup>) ν 2951.9, 1466.5, 1436.4, 1358.1, 1275.6, 1233.7, 830.8, 791.2, 736.0, 643.1.

## NMR spectra of the complexes 1 and 5

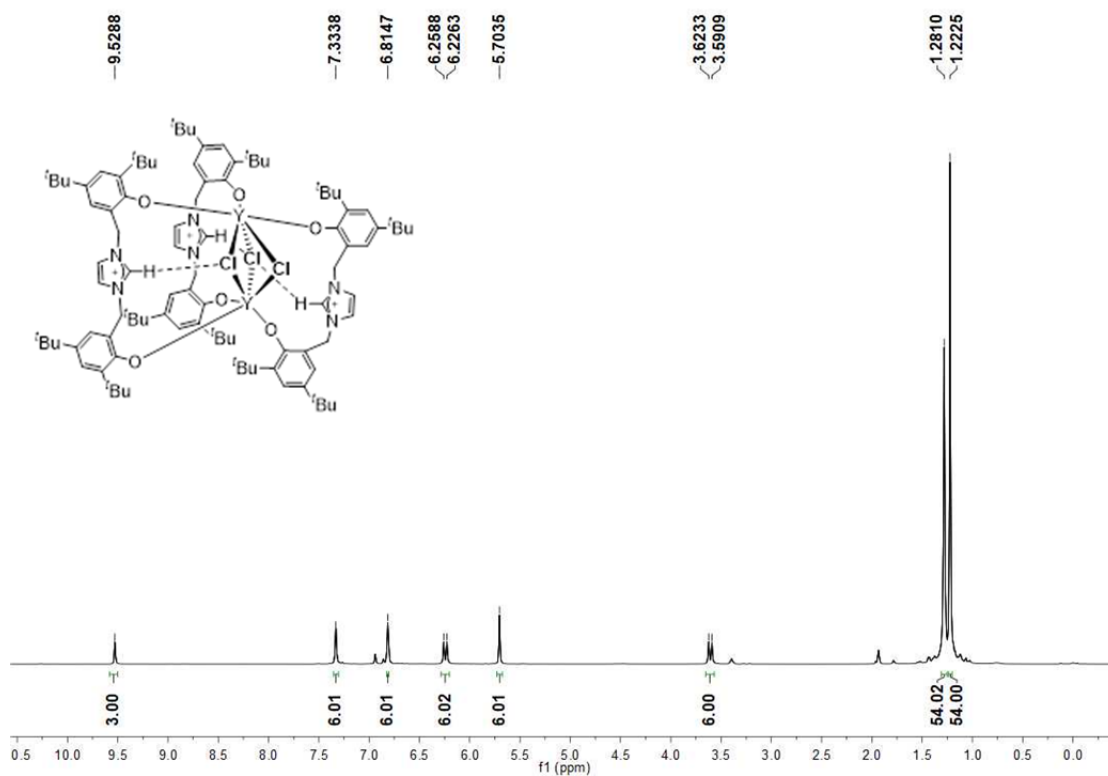

Fig. S5  $^1\text{H}$  NMR spectrum of complex 1 in  $\text{Tol-}d_8$

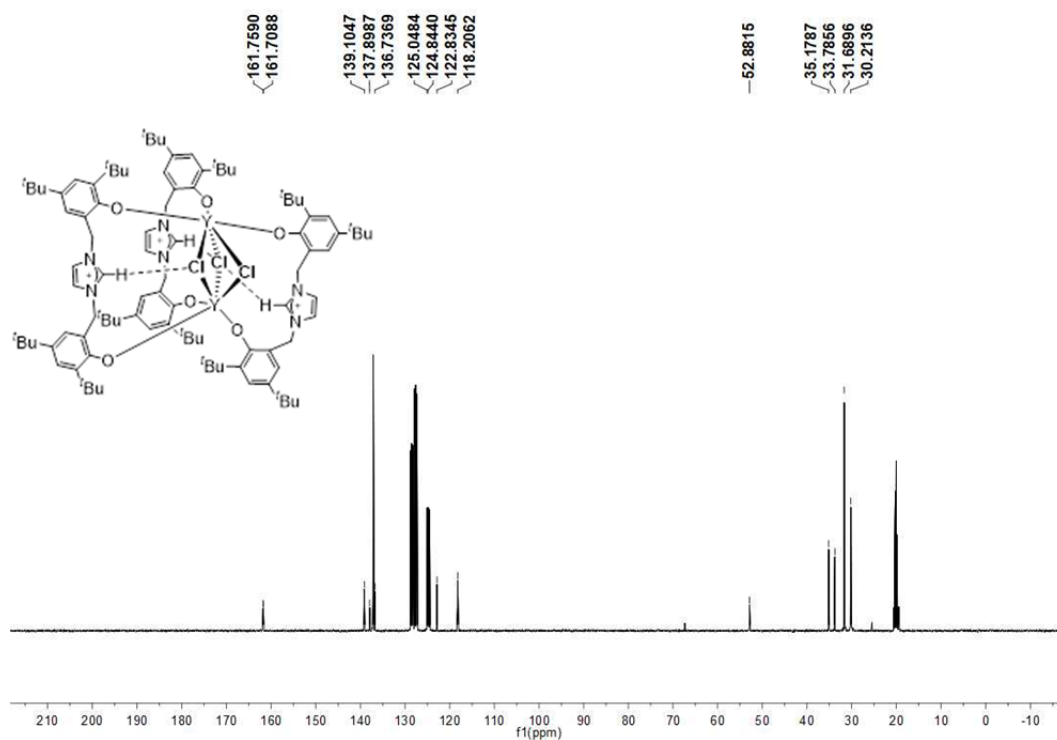

Fig. S6  $^{13}\text{C}\{^1\text{H}\}$  NMR spectrum of complex 1 in  $\text{Tol-}d_8$

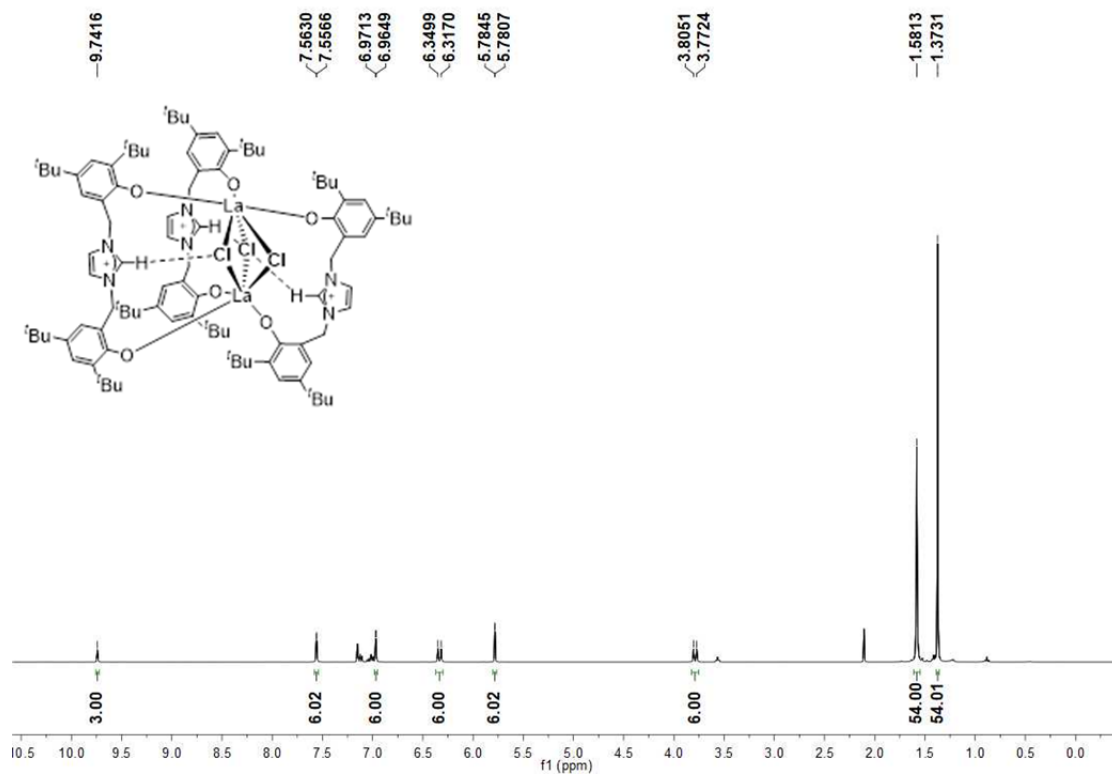

Fig. S7  $^1\text{H}$  NMR spectrum of complex 5 in  $\text{C}_6\text{D}_6$

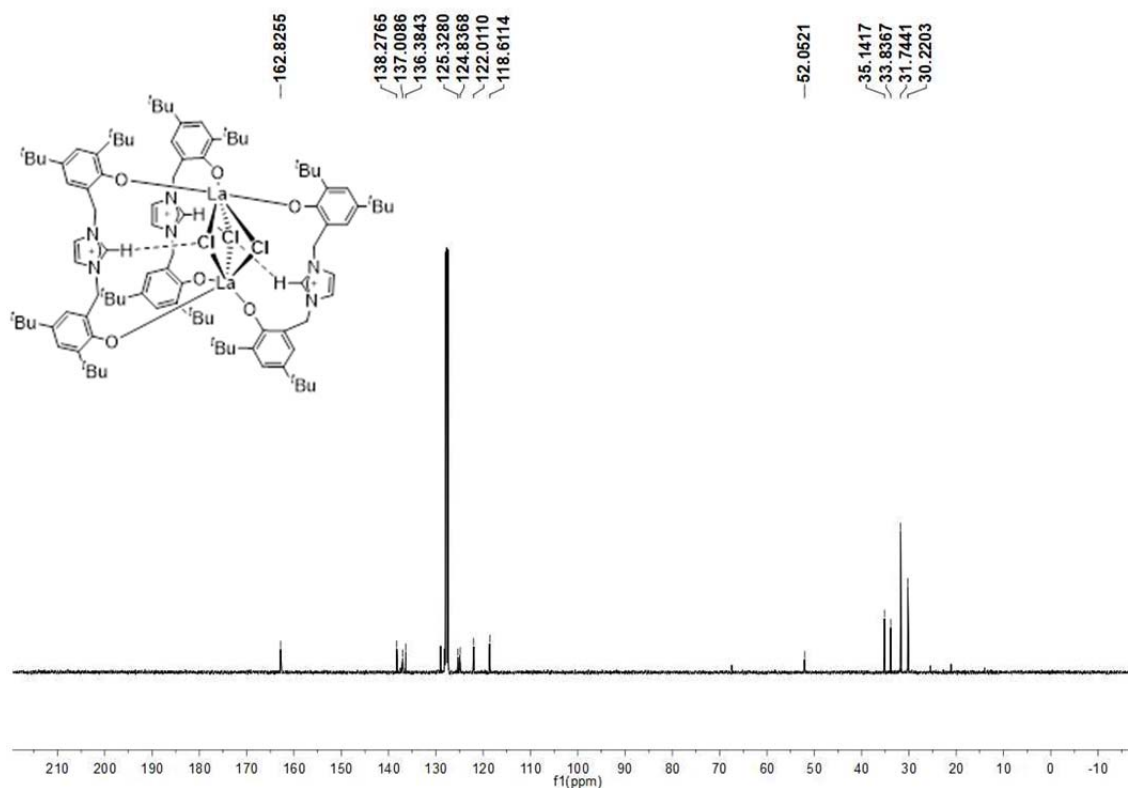

Fig. S8  $^{13}\text{C}\{^1\text{H}\}$  NMR spectrum of complex 5 in  $\text{C}_6\text{D}_6$

## Characterization data of the propiolic acids

**Phenylpropionic acid (6a)**<sup>4,5</sup>. White solid, 70.8 mg, yield 97%; Mp. 141.5–142.3 °C. <sup>1</sup>H NMR (400 MHz, CDCl<sub>3</sub>): δ 10.05 (s, 1H, COOH), 7.61–7.59 (m, 2H, ArH); 7.49–7.45 (m, 1H, ArH); 7.40–7.36 (t, *J* = 7.5 Hz, 2H, ArH) ppm. <sup>13</sup>C{<sup>1</sup>H} NMR (101 MHz, CDCl<sub>3</sub>): δ 158.8, 133.3, 131.2, 128.7, 119.1, 89.2, 80.1 ppm. HRMS (ESI, *m/z*) calcd for C<sub>9</sub>H<sub>7</sub>O<sub>2</sub><sup>+</sup>: 147.0440, found: 147.0452.

**2-Fluorophenylpropionic acid (6b)**<sup>4,5</sup>. White solid, 76.3 mg, yield 93%; Mp. 118.7–120.1 °C. <sup>1</sup>H NMR (400 MHz, DMSO-*d*<sub>6</sub>): δ 13.92 (s, 1H, COOH), 7.73–7.69 (t, *J* = 1.7 Hz, 1H, ArH); 7.65–7.59 (m, 1H, ArH); 7.42–7.37 (t, *J* = 9.1 Hz, 1H, ArH); 7.34–7.30 (t, *J* = 7.4 Hz, 1H, ArH) ppm. <sup>13</sup>C{<sup>1</sup>H} NMR (101 MHz, DMSO-*d*<sub>6</sub>): δ 163.3 (d, <sup>1</sup>*J*<sub>C-F</sub> = 253.2 Hz), 154.4, 135.0, 133.9 (d, <sup>3</sup>*J*<sub>C-F</sub> = 8.1 Hz), 125.6 (d, <sup>4</sup>*J*<sub>C-F</sub> = 3.0 Hz), 116.5 (d, <sup>2</sup>*J*<sub>C-F</sub> = 20.2 Hz), 108.1 (d, <sup>2</sup>*J*<sub>C-F</sub> = 16.1 Hz), 86.8 (d, <sup>3</sup>*J*<sub>C-F</sub> = 3.0 Hz), 78.1 ppm. <sup>19</sup>F NMR (377 MHz, DMSO-*d*<sub>6</sub>): δ –109.0 ppm. HRMS (ESI, *m/z*) calcd for C<sub>9</sub>H<sub>5</sub>O<sub>2</sub>FNa<sup>+</sup>: 187.0165, found: 187.0167.

**4-Fluorophenylpropionic acid (6c)**<sup>4,5</sup>. White solid, 80.4 mg, yield 98%; Mp. 151.1–152.3 °C. <sup>1</sup>H NMR (400 MHz, DMSO-*d*<sub>6</sub>): δ 13.80 (s, 1H, COOH), 7.73–7.70 (m, 2H, ArH); 7.35–7.31 (m, 2H, ArH) ppm. <sup>13</sup>C NMR (101 MHz, DMSO-*d*<sub>6</sub>): δ 163.7 (d, <sup>1</sup>*J*<sub>C-F</sub> = 251.5 Hz), 154.7, 135.8 (d, <sup>3</sup>*J*<sub>C-F</sub> = 9.1 Hz), 116.9 (d, <sup>2</sup>*J*<sub>C-F</sub> = 22.2 Hz), 115.9 (<sup>4</sup>*J*<sub>C-F</sub> = 3.0 Hz), 83.8, 82.1 ppm. <sup>19</sup>F NMR (377 MHz, DMSO-*d*<sub>6</sub>): δ –107.0 ppm. HRMS (ESI, *m/z*) calcd for C<sub>9</sub>H<sub>6</sub>O<sub>2</sub>F<sup>+</sup>: 165.0346, found: 165.0347.

**4-Chlorophenylpropionic acid (6d)**<sup>4,5</sup>. White solid, 86.4 mg, yield 96%; Mp. 189.5–190.3 °C. <sup>1</sup>H NMR (400 MHz, DMSO-*d*<sub>6</sub>): δ 13.91 (s, 1H, COOH), 7.67–7.65 (d, *J* = 8.6 Hz, 2H, ArH); 7.56–7.54 (d, *J* = 8.6 Hz, 2H, ArH) ppm. <sup>13</sup>C{<sup>1</sup>H} NMR (101 MHz, DMSO-*d*<sub>6</sub>): δ 154.6, 136.3, 134.8, 129.7, 118.3, 83.6, 83.0 ppm. HRMS (ESI, *m/z*) calcd for C<sub>9</sub>H<sub>5</sub>O<sub>2</sub>ClNa<sup>+</sup>: 202.9870, found: 202.9876.

**4-Bromophenylpropionic acid (6e)**<sup>4,5</sup>. Light yellow solid, 109.7 mg, yield 98%; Mp. 198.5–200.1 °C. <sup>1</sup>H NMR (400 MHz, DMSO-*d*<sub>6</sub>): δ 13.87 (s, 1H, COOH), 7.70–7.68 (d, *J* = 8.6 Hz, 2H, ArH); 7.59–7.57 (d, *J* = 8.6 Hz, 2H, ArH) ppm. <sup>13</sup>C{<sup>1</sup>H} NMR (101 MHz, DMSO-*d*<sub>6</sub>): δ 154.6, 134.9, 132.6, 125.1, 118.7, 83.6, 83.2 ppm. HRMS (ESI, *m/z*) calcd for C<sub>9</sub>H<sub>5</sub>O<sub>2</sub>BrNa<sup>+</sup>: 246.9365, found: 246.9365.

**3-Bromophenylpropionic acid (6f)**<sup>4,5</sup>. White solid, 106.4 mg, yield 95%; Mp. 187.5–188.4 °C. <sup>1</sup>H NMR (400 MHz, DMSO-*d*<sub>6</sub>): δ 7.84 (s, 1H, ArH); 7.75–7.73 (d, *J* = 8.1 Hz, 1H, ArH); 7.64–7.62 (d, *J* = 7.8 Hz, 1H, ArH); 7.44–7.40 (t, *J* = 7.9 Hz, 1H, ArH) ppm. <sup>13</sup>C{<sup>1</sup>H} NMR (101 MHz, DMSO-*d*<sub>6</sub>): δ 154.5, 135.1, 134.3, 132.1, 131.5, 122.3, 121.7, 83.1, 82.9 ppm. HRMS (ESI, *m/z*) calcd for C<sub>9</sub>H<sub>5</sub>O<sub>2</sub>BrNa<sup>+</sup>: 246.9365, found: 246.9370.

**4-Trifluoromethylphenylpropionic acid (6g)**<sup>4,5</sup>. White solid, 102.7 mg, yield 96%;

Mp. 142.3–143.5 °C.  $^1\text{H}$  NMR (400 MHz, DMSO- $d_6$ ):  $\delta$  7.86–7.81 (m, 4H, ArH) ppm.  $^{13}\text{C}\{^1\text{H}\}$  NMR (101 MHz, DMSO- $d_6$ ):  $\delta$  154.4, 133.8, 130.9 (q,  $^2J_{\text{C-F}} = 32.3$  Hz), 126.3 (q,  $^3J_{\text{C-F}} = 4.0$  Hz), 125.5, 123.3 (d,  $^1J_{\text{C-F}} = 103.0$  Hz), 83.9, 82.7 ppm.  $^{19}\text{F}$  NMR (377 MHz, DMSO- $d_6$ ):  $\delta$  -61.7 ppm. HRMS (ESI, m/z) calcd for  $\text{C}_{10}\text{H}_6\text{O}_2\text{F}_3^+$ : 215.0314, found: 215.03116.

**3-(3,5-Bis(trifluoromethyl)phenyl)propionic acid (6h)**<sup>4,5</sup>. White solid, 136.7 mg, yield 97%; Mp. 135.2–136.1 °C.  $^1\text{H}$  NMR (400 MHz, DMSO- $d_6$ ):  $\delta$  8.35 (s, 2H, ArH); 8.24 (s, 1H, ArH) ppm.  $^{13}\text{C}\{^1\text{H}\}$  NMR (101 MHz, DMSO- $d_6$ ):  $\delta$  154.2, 133.6 (d,  $^3J_{\text{C-F}} = 3.0$  Hz), 131.5 (q,  $^2J_{\text{C-F}} = 33.3$  Hz), 124.5, 123.1 (q,  $^1J_{\text{C-F}} = 274.7$  Hz), 122.4, 84.4, 80.9 ppm.  $^{19}\text{F}$  NMR (377 MHz, DMSO- $d_6$ ):  $\delta$  -61.7 ppm. HRMS (ESI, m/z) calcd for  $\text{C}_{11}\text{H}_5\text{O}_2\text{F}_6^+$ : 283.0188, found: 283.0191.

**4-Nitrophenylpropionic acid (6i)**<sup>4,5</sup>. Yellow solid, 91.7 mg, yield 96%; Mp. 173.5–174.7 °C.  $^1\text{H}$  NMR (400 MHz, DMSO- $d_6$ ):  $\delta$  8.29–8.27 (d,  $J = 8.9$  Hz, 2H, ArH); 7.92–7.90 (d,  $J = 8.9$  Hz, 2H, ArH) ppm.  $^{13}\text{C}\{^1\text{H}\}$  NMR (101 MHz, DMSO- $d_6$ ):  $\delta$  154.3, 148.7, 134.3, 126.1, 124.4, 85.5, 82.2 ppm. HRMS (ESI, m/z) calcd for  $\text{C}_9\text{H}_5\text{O}_4\text{NNa}^+$ : 214.0110, found: 214.0115.

**4-Cyanophenylpropionic acid(6j)**<sup>5</sup>. White solid, 83.7 mg, yield 98%; Mp. 178.6–179.5 °C.  $^1\text{H}$  NMR (400 MHz, DMSO- $d_6$ ):  $\delta$  7.94–7.92 (d,  $J = 8.3$  Hz, 2H, ArH); 7.82–7.80 (d,  $J = 8.3$  Hz, 2H, ArH) ppm.  $^{13}\text{C}\{^1\text{H}\}$  NMR (101 MHz, DMSO- $d_6$ ):  $\delta$  154.3, 133.6, 133.2, 124.3, 118.5, 113.5, 85.0, 82.6 ppm. HRMS (EI, m/z) calcd for  $\text{C}_{10}\text{H}_5\text{O}_2\text{N}^+$ : 171.0320, found: 171.0326.

**4-Formylphenylpropionic acid (6k)**<sup>5</sup>. White solid, 85.3 mg, yield 98%; Mp. 189.5–190.6 °C.  $^1\text{H}$  NMR (400 MHz, DMSO- $d_6$ ):  $\delta$  13.97 (s, 1H, COOH), 10.06 (s, 1H, CHO), 7.99–7.97 (d,  $J = 8.2$  Hz, 2H, ArH); 7.85–7.83 (d,  $J = 8.1$  Hz, 2H, ArH) ppm.  $^{13}\text{C}$  NMR (101 MHz, DMSO- $d_6$ ):  $\delta$  193.0, 154.4, 137.4, 133.6, 130.1, 125.1, 84.6, 83.4 ppm. HRMS (EI, m/z) calcd for  $\text{C}_{10}\text{H}_6\text{O}_3^+$ : 174.0317, found: 174.0313.

**4-(Methoxycarbonyl)phenylpropionic acid (6l)**<sup>5</sup>. Light yellow solid, 99.8 mg, yield 98%; Mp. 162.8–163.7 °C.  $^1\text{H}$  NMR (400 MHz, DMSO- $d_6$ ):  $\delta$  8.03–8.00 (d,  $J = 8.3$  Hz, 2H, ArH); 7.78–7.76 (d,  $J = 8.3$  Hz, 2H, ArH); 3.89 (s, 3H, OCH<sub>3</sub>) ppm.  $^{13}\text{C}\{^1\text{H}\}$  NMR (101 MHz, DMSO- $d_6$ ):  $\delta$  165.8, 154.4, 133.3, 131.6, 129.9, 124.1, 84.2, 83.3, 52.9 ppm. HRMS (EI, m/z) calcd for  $\text{C}_{11}\text{H}_8\text{O}_4^+$ : 204.0423, found: 204.0429.

**4-Methylphenylpropionic acid (6m)**<sup>4,5</sup>. White solid, 78.4 mg, yield 98%; Mp. 151.5–152.6 °C.  $^1\text{H}$  NMR (400 MHz, DMSO- $d_6$ ):  $\delta$  7.51–7.49 (d,  $J = 8.1$  Hz, 2H, ArH); 7.28–7.26 (d,  $J = 8.0$  Hz, 2H, ArH); 2.34 (s, 3H, CH<sub>3</sub>) ppm.  $^{13}\text{C}\{^1\text{H}\}$  NMR (101 MHz, DMSO- $d_6$ ):  $\delta$  154.9, 141.6, 133.1, 130.1, 116.3, 85.3, 81.9, 21.6 ppm. HRMS (ESI, m/z) calcd for  $\text{C}_{10}\text{H}_9\text{O}_2^+$ : 161.0597, found: 161.0596.

**3-Methylphenylpropionic acid (6n)**<sup>4,5</sup>. White solid, 72.1 mg, yield 90%; Mp. 130.7–131.5 °C. <sup>1</sup>H NMR (400 MHz, DMSO-*d*<sub>6</sub>): δ 7.44 (s, 1H, ArH); 7.42-7.40 (m, 1H, ArH); 7.36 (s, 1H, ArH); 7.34 (s, 1H, ArH); 2.32 (s, 3H, CH<sub>3</sub>) ppm. <sup>13</sup>C{<sup>1</sup>H} NMR (101 MHz, DMSO-*d*<sub>6</sub>): δ 154.8, 139.0, 133.3, 132.1, 130.2, 129.4, 119.3, 85.0, 82.0, 21.1 ppm. HRMS (ESI, m/z) calcd for C<sub>10</sub>H<sub>8</sub>O<sub>2</sub>Na<sup>+</sup>: 183.0416, found: 183.0422.

**4-tert-Butylphenylpropionic acid (6o)**<sup>4,5</sup>. White solid, 97.1 mg, yield 96%; Mp. 155.5–156.2 °C. <sup>1</sup>H NMR (400 MHz, CDCl<sub>3</sub>): δ 10.65 (s, 1H, COOH), 7.59-7.57 (d, *J* = 8.5 Hz, 2H, ArH); 7.44-7.42 (d, *J* = 8.5 Hz, 2H, ArH); 1.34 (s, 9H, CH<sub>3</sub>) ppm. <sup>13</sup>C{<sup>1</sup>H} NMR (101 MHz, CDCl<sub>3</sub>): δ 158.8, 154.9, 133.2, 125.8, 116.0, 89.6, 79.9, 35.1, 31.0 ppm. HRMS (ESI, m/z) calcd for C<sub>13</sub>H<sub>14</sub>O<sub>2</sub>Na<sup>+</sup>: 225.0886, found: 225.0887.

**3-(Biphenyl-4-yl)propionic acid (6p)**<sup>4,5</sup>. Brown solid, 106.6 mg, yield 96%; Mp. 162.4–163.3 °C. <sup>1</sup>H NMR (400 MHz, DMSO-*d*<sub>6</sub>): δ 13.76 (s, 1H, COOH), 7.79-7.77 (d, *J* = 8.4 Hz, 2H, ArH); 7.73-7.71 (m, 4H, ArH); 7.52-7.48 (t, *J* = 7.5 Hz, 2H, ArH); 7.44-7.40 (t, *J* = 7.3 Hz, 1H, ArH) ppm. <sup>13</sup>C{<sup>1</sup>H} NMR (101 MHz, DMSO-*d*<sub>6</sub>): δ 154.8, 142.8, 139.2, 133.7, 129.6, 128.8, 127.6, 127.3, 118.3, 84.8, 82.9 ppm. HRMS (ESI, m/z) calcd For C<sub>15</sub>H<sub>10</sub>O<sub>2</sub>Na<sup>+</sup>: 245.0573, found: 245.0569.

**4-Methoxyphenylpropionic acid (6q)**<sup>4,5</sup>. Brown solid, 57.2 mg, yield 65%; Mp. 153.6–154.2 °C. <sup>1</sup>H NMR (400 MHz, DMSO-*d*<sub>6</sub>): δ 7.59-7.57 (d, *J* = 8.8 Hz, 2H, ArH); 7.03-7.01 (d, *J* = 8.9 Hz, 2H, ArH); δ 3.81 (s, 3H, CH<sub>3</sub>) ppm. <sup>13</sup>C{<sup>1</sup>H} NMR (101 MHz, DMSO-*d*<sub>6</sub>): δ 161.7, 155.0, 135.1, 115.2, 111.0, 85.8, 81.5, 55.9 ppm. HRMS (ESI, m/z) calcd for C<sub>10</sub>H<sub>9</sub>O<sub>3</sub><sup>+</sup>: 177.0546, found: 177.0559.

**3-(Naphthalen-1-yl)propionic acid (6r)**<sup>5</sup>. White solid, 97.1 mg, yield 99%; Mp. 135.8–136.5 °C. <sup>1</sup>H NMR (400 MHz, DMSO-*d*<sub>6</sub>): δ 13.88 (s, 1H, COOH), 8.24-8.22 (d, *J* = 7.2 Hz, 1H, ArH); 8.13-8.11 (d, *J* = 7.2 Hz, 1H, ArH); 8.04-8.03 (d, *J* = 7.0 Hz, 1H, ArH); 7.93-7.92 (d, *J* = 5.6 Hz, 1H, ArH); 7.72-7.58 (m, 3H, ArH) ppm. <sup>13</sup>C{<sup>1</sup>H} NMR (101 MHz, DMSO-*d*<sub>6</sub>): δ 154.8, 133.3, 133.2, 133.1, 131.9, 129.2, 128.5, 127.6, 126.1, 125.3, 116.8, 86.9, 82.9 ppm. HRMS (EI, m/z) calcd for C<sub>13</sub>H<sub>8</sub>O<sub>2</sub>: 196.0524, found: 196.0521.

**3-(Phenanthren-9-yl)propionic acid (6s)**<sup>5</sup>. White solid, 121.8 mg, yield 99%; Mp. 183.8–184.9 °C. <sup>1</sup>H NMR (400 MHz, DMSO-*d*<sub>6</sub>): δ 14.01 (s, 1H, COOH), 8.93-8.91 (m, 1H, ArH); 8.88-8.86 (d, *J* = 8.1 Hz, 1H, ArH); 8.43 (s, 1H, ArH); 8.32-8.31 (d, *J* = 4.9 Hz, 1H, ArH); 8.10-8.08 (d, *J* = 7.6 Hz, 1H, ArH); 7.82 (s, 1H, ArH); 7.74-7.71 (t, *J* = 7.3 Hz, 1H, ArH) ppm. <sup>13</sup>C{<sup>1</sup>H} NMR (101 MHz, DMSO-*d*<sub>6</sub>): δ 154.8, 135.6, 131.0, 130.7, 130.3, 130.0, 129.7, 128.4, 128.1, 126.1, 124.1, 123.5, 115.7, 86.5, 83.0 ppm. HRMS (ESI, m/z) calcd for C<sub>17</sub>H<sub>9</sub>O<sub>2</sub> [M-H]<sup>-</sup>: 245.0608, found: 245.0612.

**3-(Pyren-1-yl)propionic acid (6t)**<sup>4,5</sup>. Yellow solid, 133.7 mg, yield 99%; Mp. 172.6–173.4 °C. <sup>1</sup>H NMR (400 MHz, DMSO-*d*<sub>6</sub>): δ 14.01 (s, 1H, COOH), 8.47–8.39 (m, 4H,

ArH); 8.33–8.31 (m, 3H, ArH); 8.24 (d,  $J = 8.9$  Hz, 1H, ArH); 8.18–8.14 (t,  $J = 7.6$  Hz, 1H, ArH) ppm.  $^{13}\text{C}\{^1\text{H}\}$  NMR (101 MHz, DMSO- $d_6$ ):  $\delta$  154.9, 133.1, 133.0, 131.3, 131.1, 130.7, 130.2, 130.0, 127.6, 127.5, 127.2, 127.1, 125.4, 124.5, 123.8, 123.5, 113.2, 87.6, 84.0 ppm. HRMS (ESI,  $m/z$ ) calcd for  $\text{C}_{19}\text{H}_{11}\text{O}_2^+$ : 271.0753, found: 271.0768.

**3-(Thiophen-2-yl)propionic acid (6u)**<sup>4,5</sup>. Brown solid, 75.2 mg, yield 99%; Mp. 153.7–154.9 °C.  $^1\text{H}$  NMR (400 MHz, DMSO- $d_6$ ):  $\delta$  13.85 (s, 1H, COOH), 7.88–7.87 (d,  $J = 5.1$  Hz, 1H, ArH); 7.68–7.66 (dd,  $J_1 = 3.7$  Hz,  $J_2 = 1.0$  Hz, 1H, ArH); 7.21–7.18 (dd,  $J_1 = 5.1$  Hz,  $J_2 = 3.7$  Hz, 1H, ArH) ppm.  $^{13}\text{C}\{^1\text{H}\}$  NMR (101 MHz, DMSO- $d_6$ ):  $\delta$  154.6, 137.5, 133.2, 128.8, 118.7, 86.3, 78.9 ppm. HRMS (ESI,  $m/z$ ) calcd for  $\text{C}_7\text{H}_5\text{O}_2\text{S}^+$ : 153.0005, found: 153.0010.

**3,3'-(1,3-Phenylene)dipropionic acid (6v)**<sup>4,5</sup>. White solid, 101.7 mg, yield 95%; Mp. 298.7 °C (dec.).  $^1\text{H}$  NMR (400 MHz, DMSO- $d_6$ ):  $\delta$  13.91 (s, 1H, COOH), 7.86 (s, 1H, ArH); 7.80–7.77 (dd,  $J = 7.8, 1.4$  Hz, 2H, ArH); 7.60–7.56 (t,  $J = 7.8$  Hz, 1H, ArH) ppm.  $^{13}\text{C}\{^1\text{H}\}$  NMR (101 MHz, DMSO- $d_6$ ):  $\delta$  154.5, 136.3, 135.1, 130.3, 120.4, 83.0, 82.9 ppm. HRMS (ESI,  $m/z$ ) calcd for  $\text{C}_{12}\text{H}_6\text{O}_4\text{Na}^+$ : 237.0158, found: 237.0150.

**3,3',3''-(1,3,5-Phenylene)tripropionic acid (6w)**<sup>5</sup>. Light yellow solid, 121.3 mg, yield 86%; 301.3 °C (dec.).  $^1\text{H}$  NMR (300 MHz, DMSO- $d_6$ ):  $\delta$  7.99 (s, 3H, ArH) ppm.  $^{13}\text{C}\{^1\text{H}\}$  NMR (75 MHz, DMSO- $d_6$ ):  $\delta$  154.4, 137.8, 121.6, 83.9, 81.4 ppm.

### Characterization data of the esters of propionic acids

**Butyl 3-phenylpropionate (7a)**<sup>7</sup>. Light yellow liquid, 97.1 mg, yield 96%;  $^1\text{H}$  NMR (400 MHz,  $\text{CDCl}_3$ ):  $\delta$  7.57–7.55 (m, 2H, ArH), 7.44–7.41 (t,  $J = 7.5$  Hz, 1H, ArH), 7.37–7.33 (t,  $J = 7.4$  Hz, 2H, ArH), 4.24–4.21 (t,  $J = 6.7$  Hz, 2H,  $\text{OCH}_2$ ), 1.72–1.65 (dd,  $J = 14.5, 7.4$  Hz, 2H,  $\text{CH}_2$ ), 1.47–1.38 (dd,  $J = 15.1, 7.5$  Hz, 2H,  $\text{CH}_2$ ), 0.97–0.93 (t,  $J = 7.4$  Hz, 3H,  $\text{CH}_3$ ) ppm.  $^{13}\text{C}\{^1\text{H}\}$  NMR (101 MHz,  $\text{CDCl}_3$ ):  $\delta$  154.1, 132.9, 130.6, 128.5, 119.6, 85.9, 80.8, 65.8, 30.5, 19.0, 13.6 ppm. HRMS (ESI,  $m/z$ ) calcd for  $\text{C}_{13}\text{H}_{14}\text{O}_2\text{Na}^+$ : 225.0886, found: 225.0889.

**Benzyl 3-phenylpropionate (7b)**<sup>6</sup>. Light yellow liquid, 94.4 mg, yield 80%;  $^1\text{H}$  NMR (400 MHz,  $\text{CDCl}_3$ ):  $\delta$  7.60–7.58 (m, 2H, ArH), 7.47–7.36 (m, 8H, ArH), 5.29 (s, 2H,  $\text{OCH}_2$ ) ppm.  $^{13}\text{C}\{^1\text{H}\}$  NMR (101 MHz,  $\text{CDCl}_3$ ):  $\delta$  153.9, 135.0, 133.1, 130.8, 128.7, 128.7, 128.6, 119.6, 86.8, 80.6, 67.7 ppm. HRMS (ESI,  $m/z$ ) calcd for  $\text{C}_{16}\text{H}_{12}\text{O}_2\text{Na}^+$ : 259.0730, found: 259.0725.

**Cinnamyl 3-phenylpropionate (7c)**<sup>6</sup>. Light yellow liquid, 117.9 mg, yield 90%;  $^1\text{H}$  NMR (400 MHz,  $\text{CDCl}_3$ ):  $\delta$  7.57–7.55 (m, 2H, ArH), 7.43–7.23 (m, 8H, ArH), 6.72–6.68 (d,  $J = 15.9$  Hz, 1H, CH), 6.34–6.27 (dt,  $J = 15.9, 6.6$  Hz, 1H, CH), 4.88–4.86 (dd,  $J = 6.6, 1.2$  Hz, 2H,  $\text{OCH}_2$ ) ppm.  $^{13}\text{C}\{^1\text{H}\}$  NMR (101 MHz,  $\text{CDCl}_3$ ):  $\delta$



153.9, 136.0, 135.4, 133.1, 130.8, 128.7, 128.6, 128.3, 126.8, 122.1, 119.6, 86.7, 80.6, 66.6 ppm. HRMS (ESI, m/z) calcd for C<sub>18</sub>H<sub>14</sub>O<sub>2</sub>Na<sup>+</sup>: 285.0886, found: 285.0893.

**Butyl 3-(4-(trifluoromethyl)phenyl)propiolate (7d)**<sup>7</sup>. Light yellow liquid, 121.5 mg, yield 90%; <sup>1</sup>H NMR (400 MHz, CDCl<sub>3</sub>): δ 7.66-7.64 (d, *J* = 8.3 Hz, 2H, ArH), 7.61-7.59 (d, *J* = 8.4 Hz, 2H, ArH), 4.24-4.21 (t, *J* = 6.7 Hz, 2H, OCH<sub>2</sub>), 1.71-1.63 (m, 2H, CH<sub>2</sub>), 1.45-1.36 (dt, *J* = 14.7, 7.5 Hz, 2H, CH<sub>2</sub>), 0.94-0.91 (t, *J* = 7.4 Hz, 3H, CH<sub>3</sub>) ppm. <sup>13</sup>C NMR (101 MHz, CDCl<sub>3</sub>): δ 153.6, 133.1, 132.0 (q, <sup>2</sup>*J*<sub>C-F</sub> = 33.3 Hz), 125.4 (q, <sup>3</sup>*J*<sub>C-F</sub> = 4.0 Hz), 123.6 (q, <sup>1</sup>*J*<sub>C-F</sub> = 273.7 Hz), 123.5, 83.6, 82.3, 66.1, 30.4, 19.0, 13.5 ppm. <sup>19</sup>F NMR (377 MHz, CDCl<sub>3</sub>): δ -63.3 ppm. HRMS (ESI, m/z) calcd for C<sub>14</sub>H<sub>13</sub>O<sub>2</sub>F<sub>3</sub>Na<sup>+</sup>: 293.0760, found: 293.0745.

**Butyl 3-(*p*-tolyl)propiolate (7e)**<sup>7</sup>. Light yellow liquid, 91.8 mg, yield 85%; <sup>1</sup>H NMR (400 MHz, CDCl<sub>3</sub>): δ 7.48-7.46 (d, *J* = 8.2 Hz, 2H, ArH), 7.17-7.15 (d, *J* = 7.9 Hz, 2H, ArH), 4.24-4.20 (t, *J* = 6.7 Hz, 2H, OCH<sub>2</sub>), 2.36 (s, 3H, ArCH<sub>3</sub>), 1.71-1.65 (m, 2H, CH<sub>2</sub>), 1.47-1.38 (dt, *J* = 14.7, 7.4 Hz, 2H, CH<sub>2</sub>), 0.97-0.93 (t, *J* = 7.4 Hz, 3H, CH<sub>3</sub>) ppm. <sup>13</sup>C NMR (101 MHz, CDCl<sub>3</sub>): δ 154.3, 141.2, 133.0, 129.3, 116.5, 86.6, 80.4, 65.8, 30.5, 21.7, 19.1, 13.7 ppm. HRMS (ESI, m/z) calcd for C<sub>14</sub>H<sub>16</sub>O<sub>2</sub>Na<sup>+</sup>: 239.1045, found: 239.1043.

**Butyl 3-(thiophen-2-yl)propiolate (7f)**<sup>7</sup>. Brown liquid, 72.8 mg, yield 70%; <sup>1</sup>H NMR (400 MHz, CDCl<sub>3</sub>): δ 7.47-7.43 (dd, *J* = 8.5, 4.4 Hz, 2H, ArH), 7.04-7.02 (dd, *J* = 5.0, 3.8 Hz, 1H, ArH), 4.24-4.20 (t, *J* = 6.7 Hz, 2H, OCH<sub>2</sub>), 1.71-1.64 (m, *J* = 14.4, 7.4 Hz, 2H, CH<sub>2</sub>), 1.46-1.37 (dt, *J* = 14.9, 7.4 Hz, 2H, CH<sub>2</sub>), 0.96-0.92 (t, *J* = 7.4 Hz, 3H, CH<sub>3</sub>) ppm. <sup>13</sup>C{<sup>1</sup>H} NMR (101 MHz, CDCl<sub>3</sub>): δ 154.1, 136.5, 131.1, 127.5, 119.4, 84.9, 80.0, 65.9, 30.5, 19.1, 13.7 ppm. HRMS (ESI, m/z) calcd for C<sub>11</sub>H<sub>12</sub>O<sub>2</sub>SNa<sup>+</sup>: 231.0450, found: 231.0442.

## NMR spectra of the propiolic acids

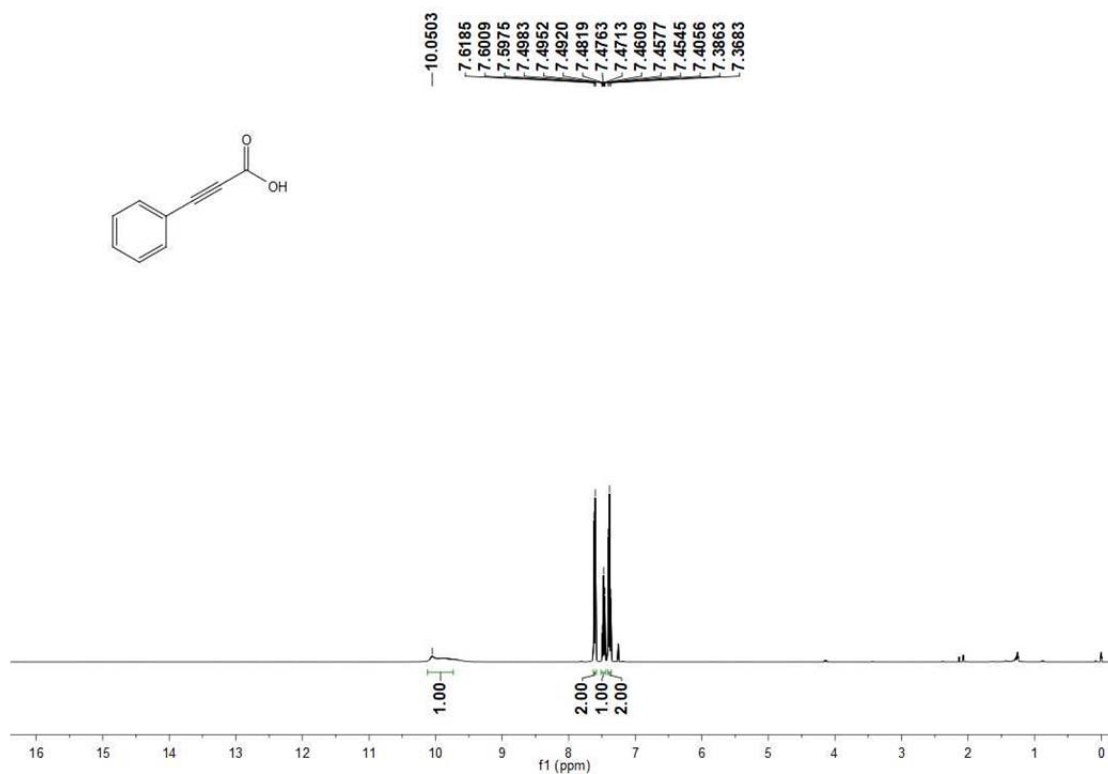

Fig. S9  $^1\text{H}$  NMR spectrum of **6a** in  $\text{CDCl}_3$

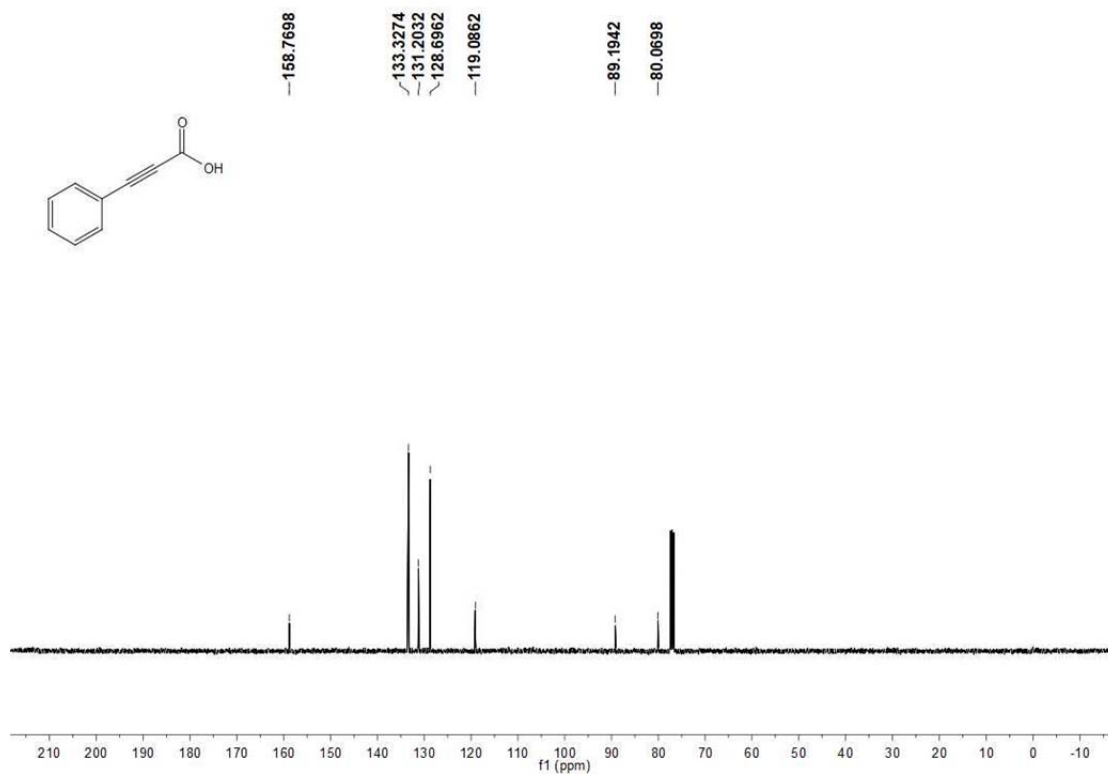

Fig. S10  $^{13}\text{C}\{^1\text{H}\}$  NMR spectrum of **6a** in  $\text{CDCl}_3$

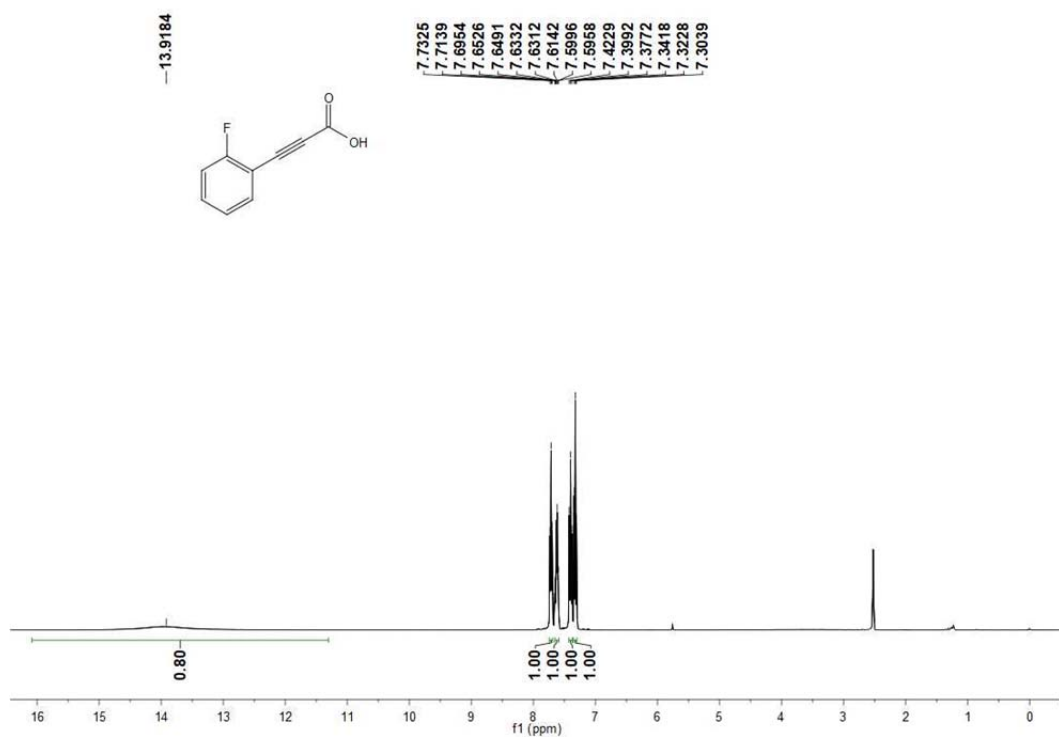

**Fig. S11**  $^1\text{H}$  NMR spectrum of **6b** in  $\text{DMSO-}d_6$

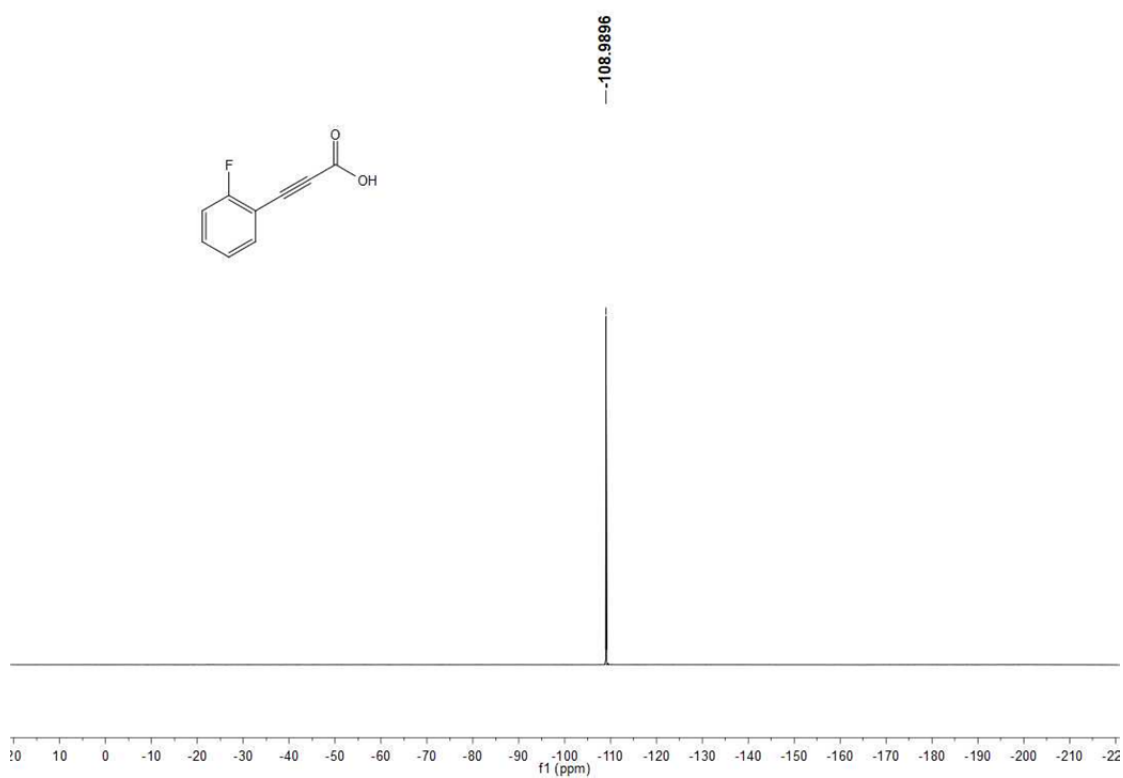

**Fig. S12**  $^{19}\text{F}$  NMR spectrum of **6b** in  $\text{DMSO-}d_6$

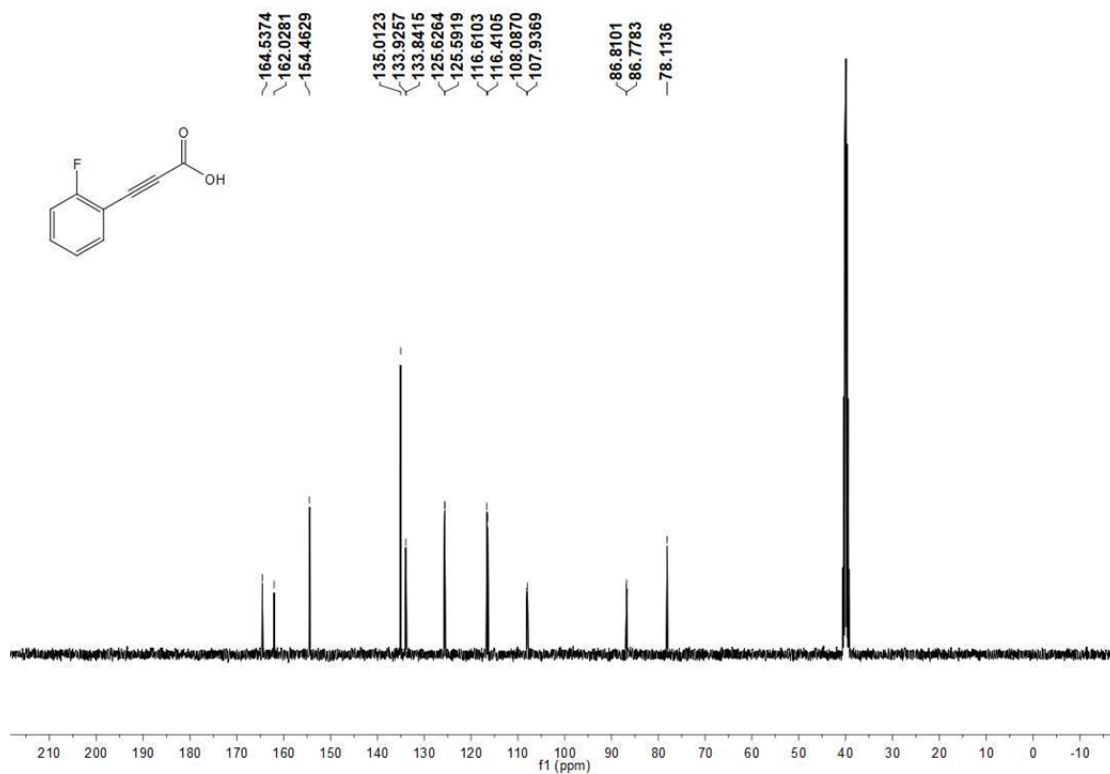

Fig. S13  $^{13}\text{C}\{^1\text{H}\}$  NMR spectrum of **6b** in  $\text{DMSO-}d_6$

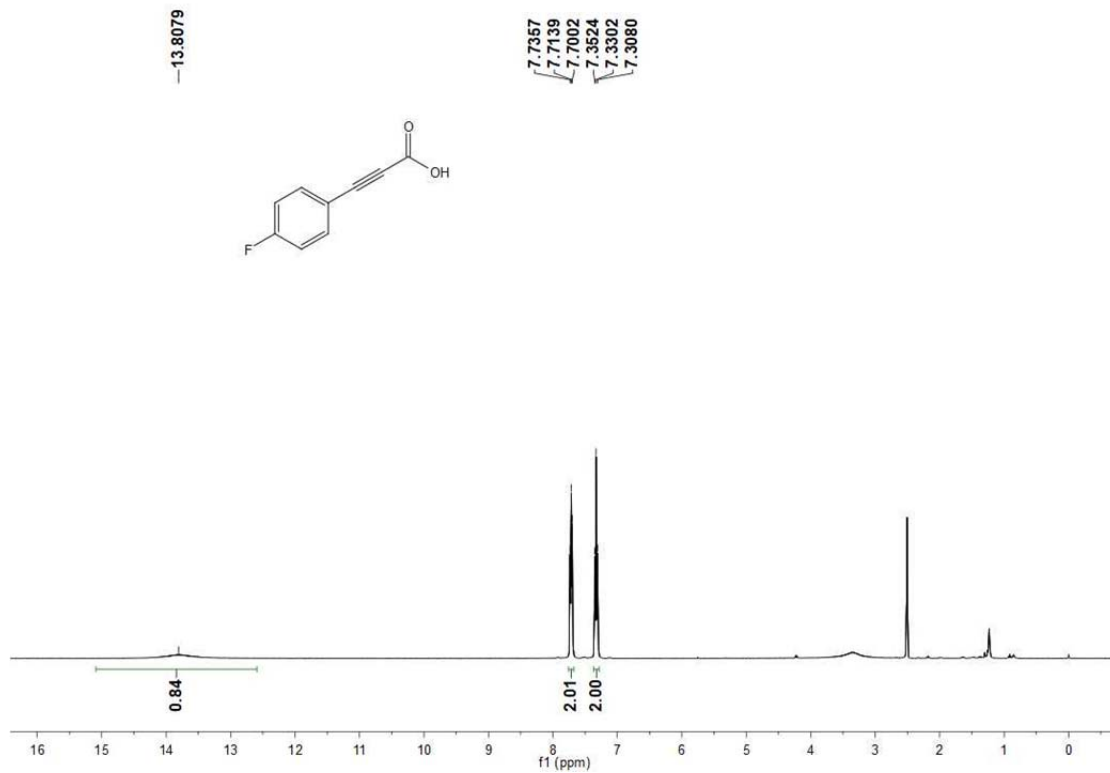

Fig. S14  $^1\text{H}$  NMR spectrum of **6c** in  $\text{DMSO-}d_6$

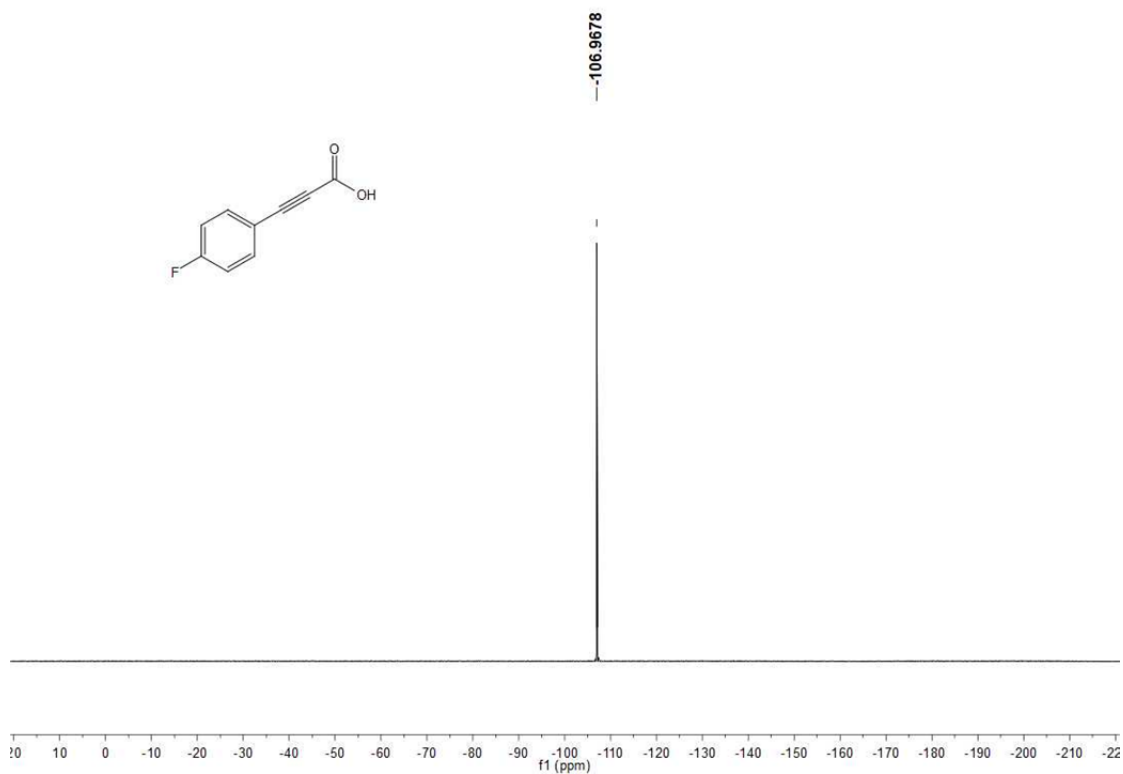

Fig. S15  $^{19}\text{F}$  NMR spectrum of 6c in  $\text{DMSO-}d_6$

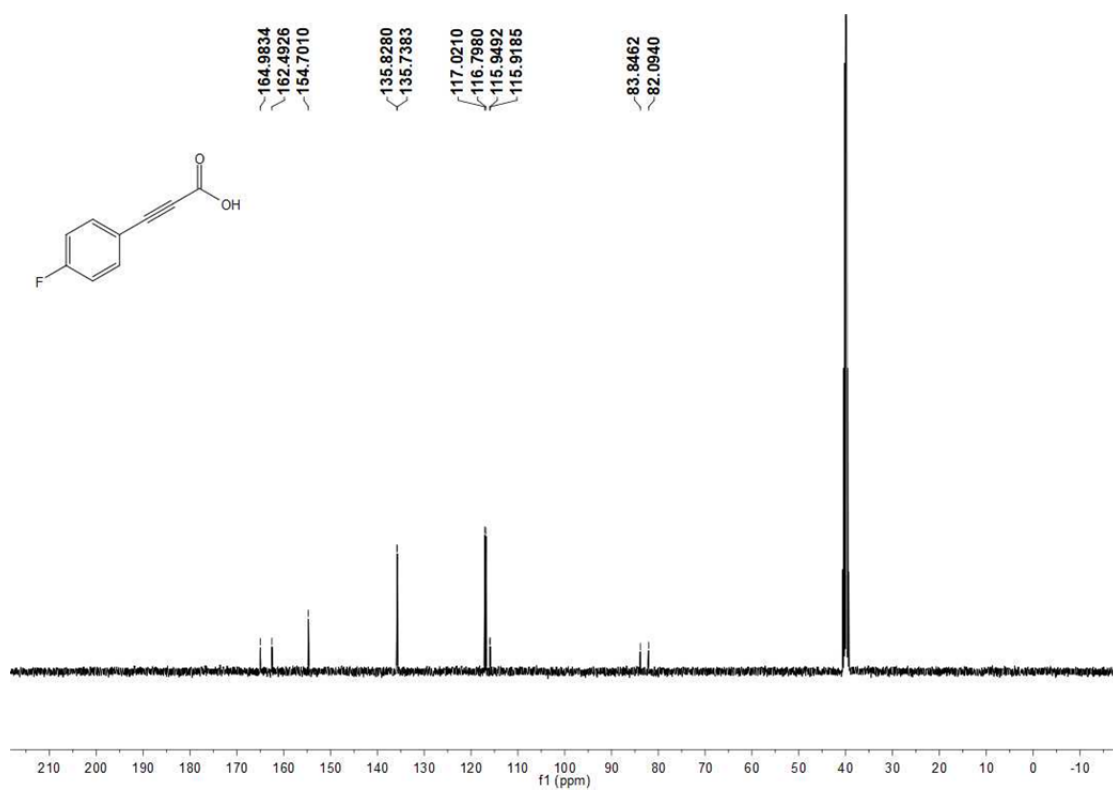

Fig. S16  $^{13}\text{C}\{^1\text{H}\}$  NMR spectrum of 6c in  $\text{DMSO-}d_6$

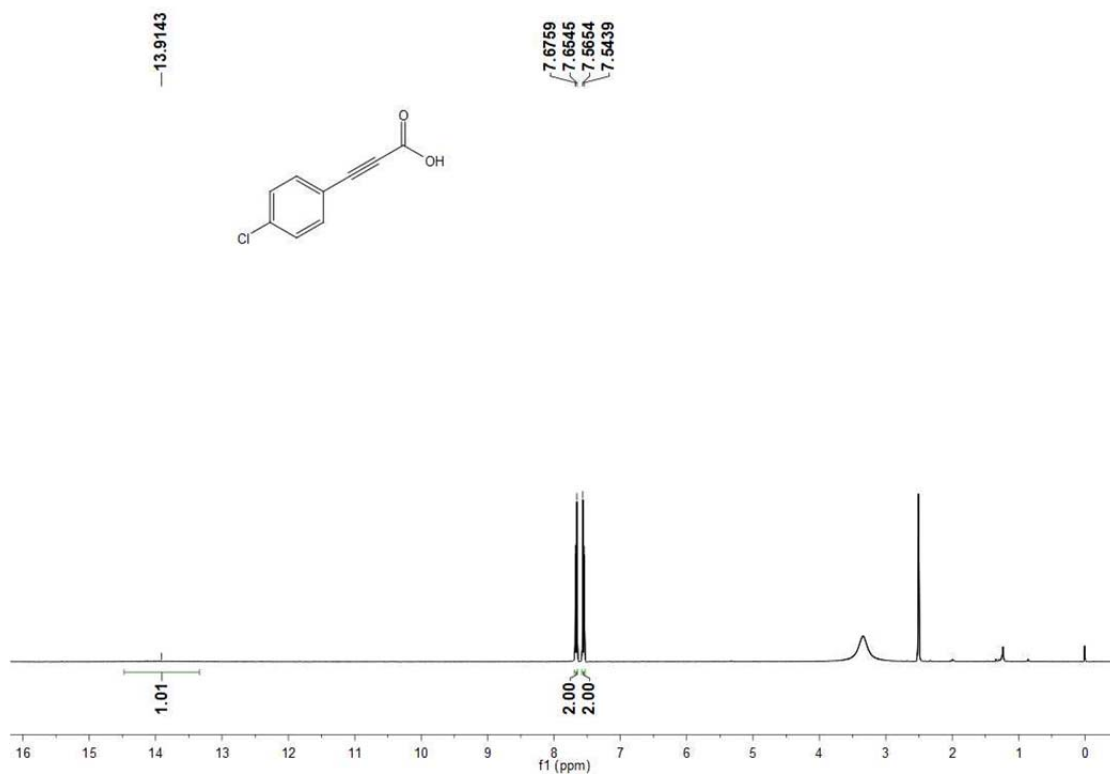

**Fig. S17**  $^1\text{H}$  NMR spectrum of **6d** in  $\text{DMSO-}d_6$

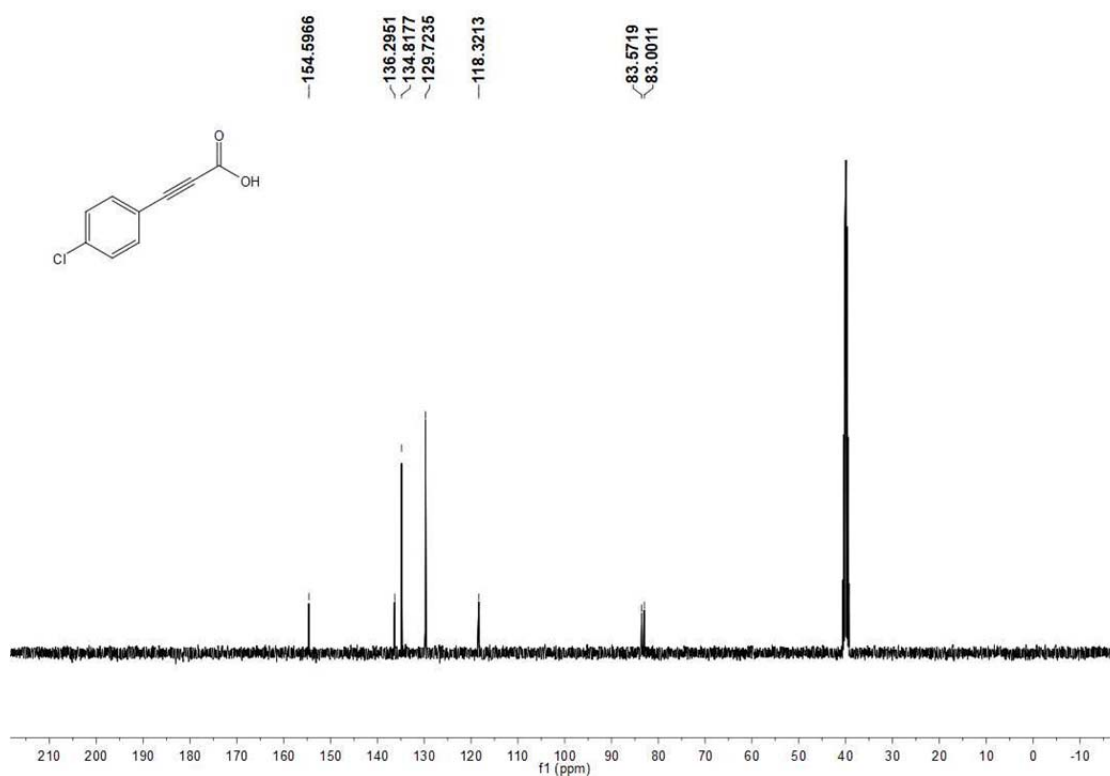

**Fig. S18**  $^{13}\text{C}\{^1\text{H}\}$  NMR spectrum of **6d** in  $\text{DMSO-}d_6$

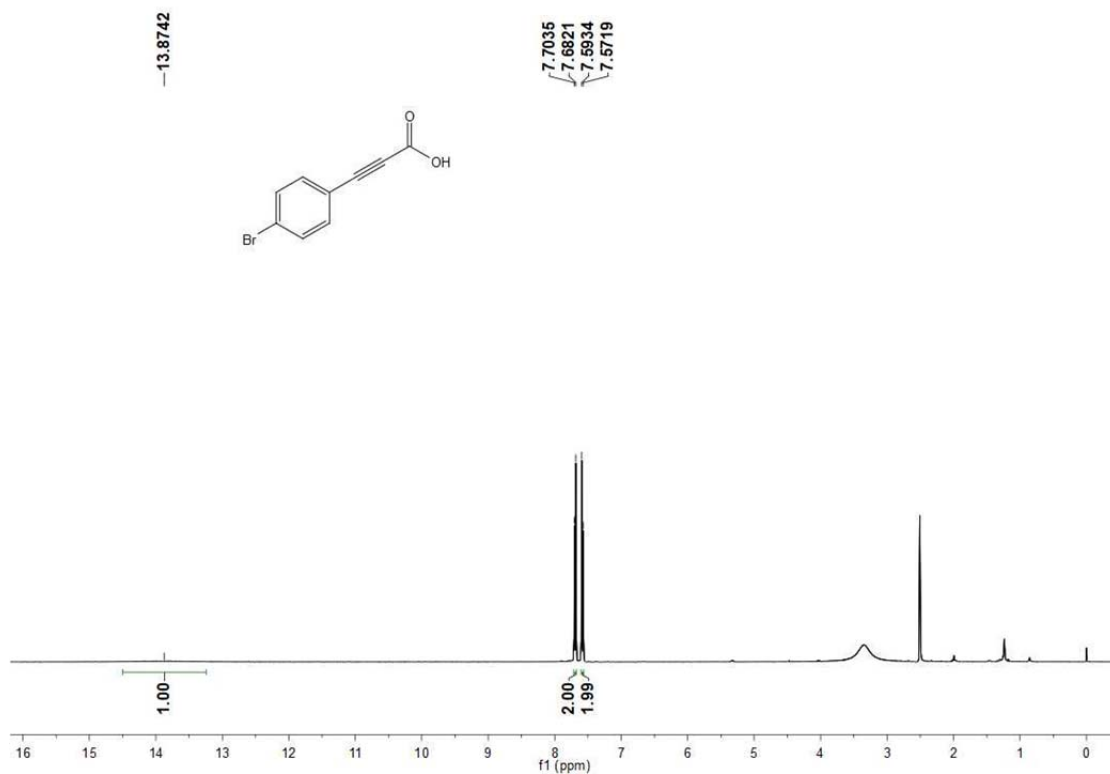

Fig. S19  $^1\text{H}$  NMR spectrum of **6e** in  $\text{DMSO-}d_6$

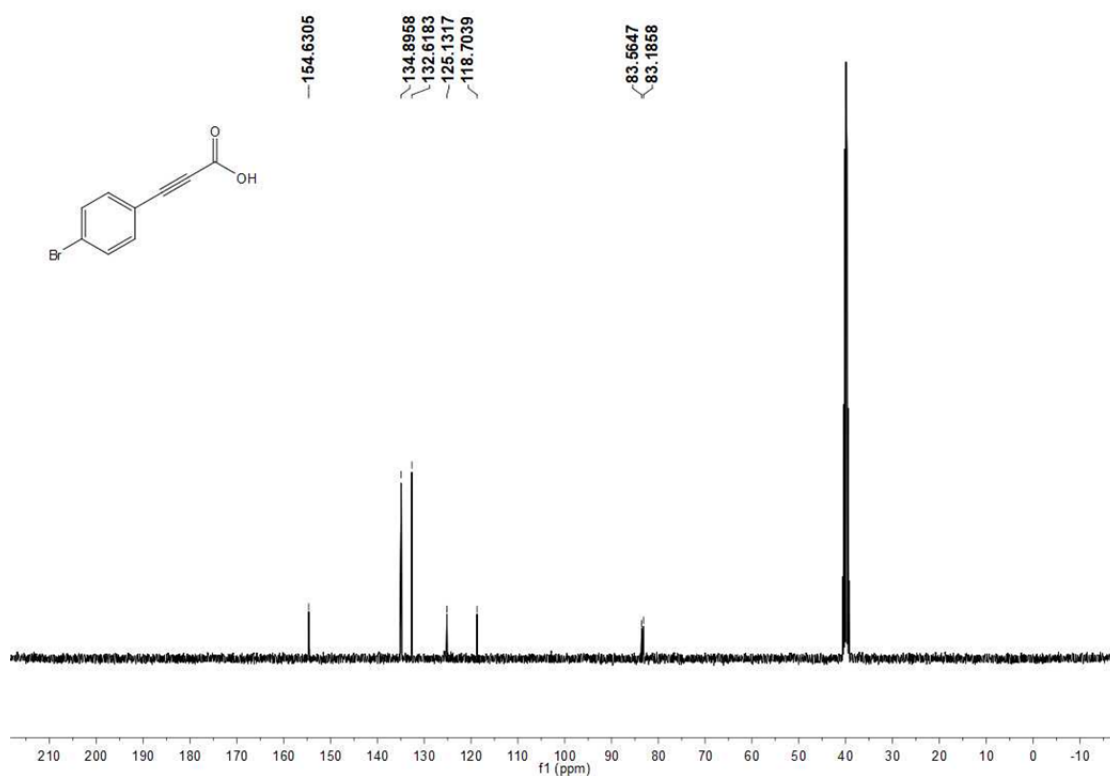

Fig. S20  $^{13}\text{C}\{^1\text{H}\}$  NMR spectrum of **6e** in  $\text{DMSO-}d_6$

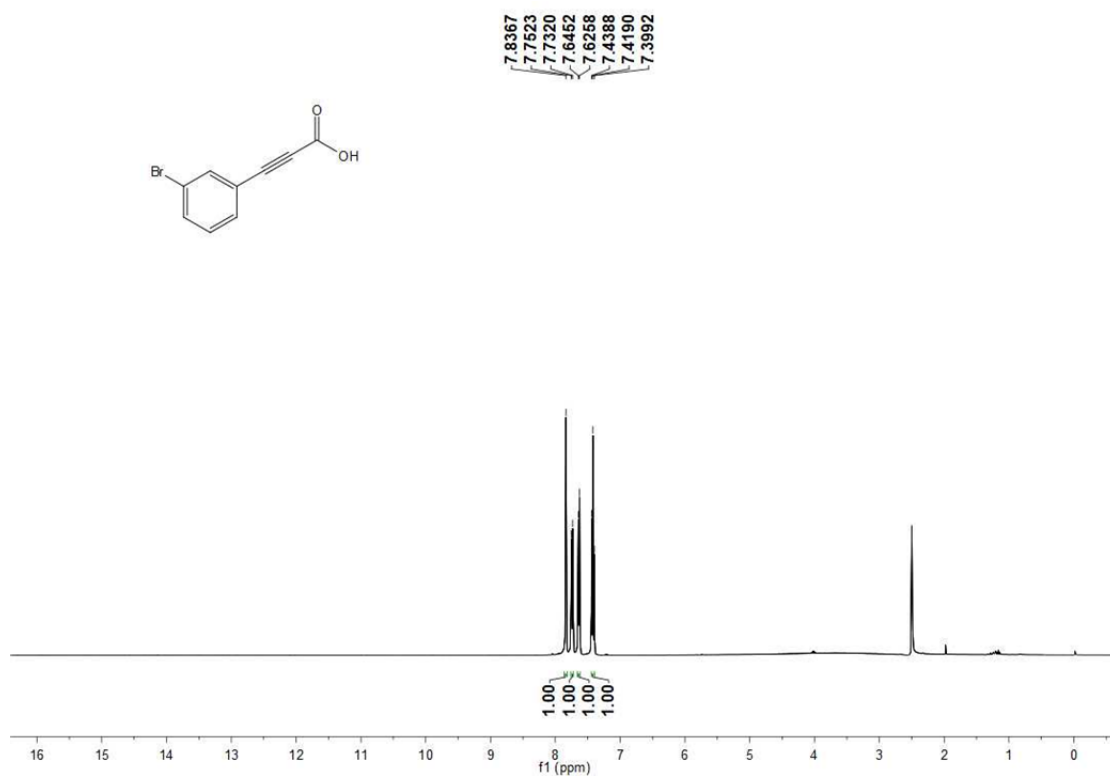

Fig. S21  $^1\text{H}$  NMR spectrum of 6f in DMSO- $d_6$

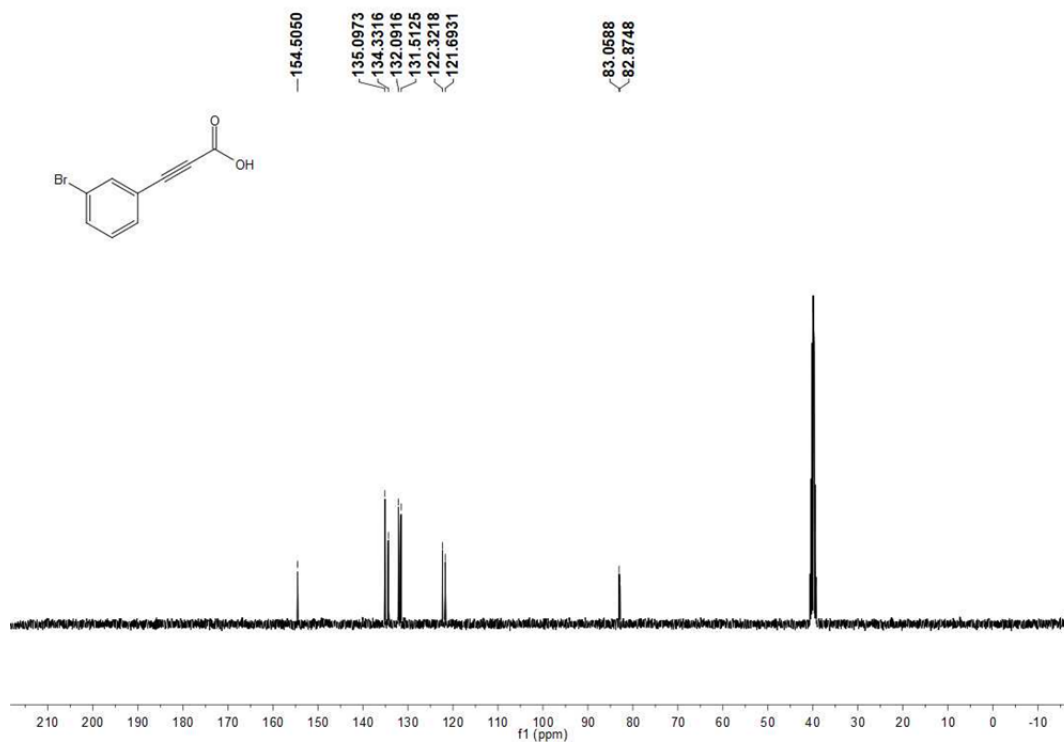

Fig. S22  $^{13}\text{C}\{^1\text{H}\}$  NMR spectrum of 6f in DMSO- $d_6$



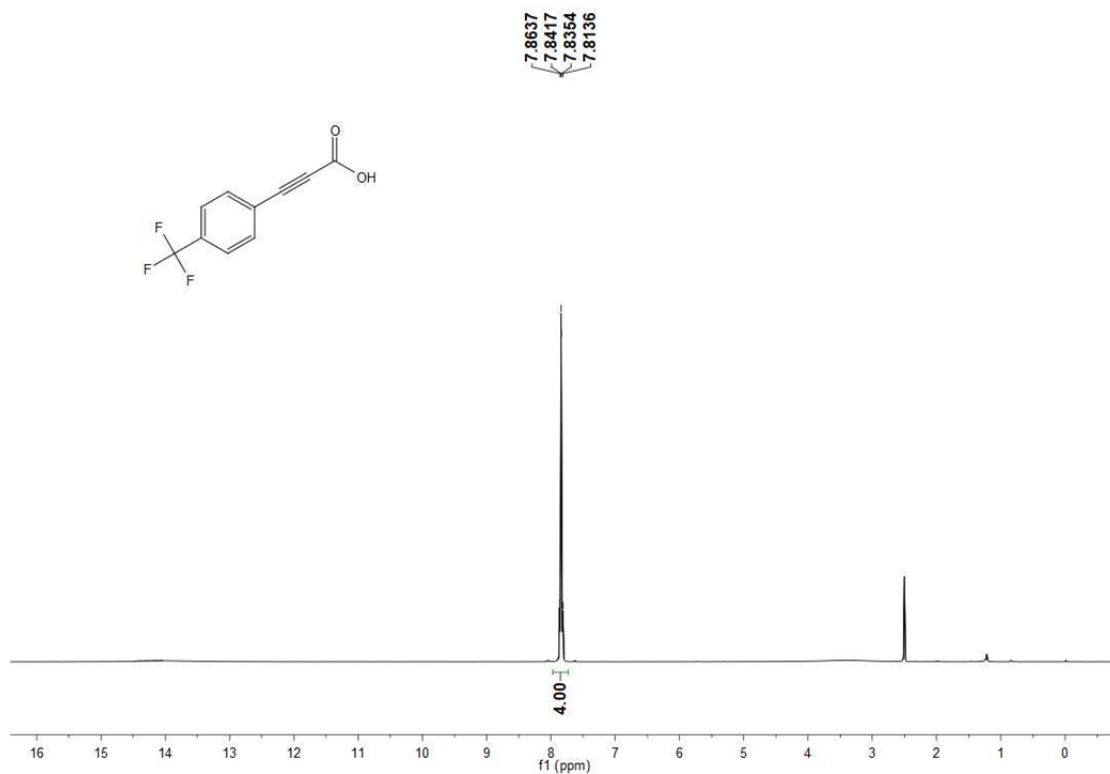

**Fig. S23**  $^1\text{H}$  NMR spectrum of **6g** in  $\text{DMSO-}d_6$

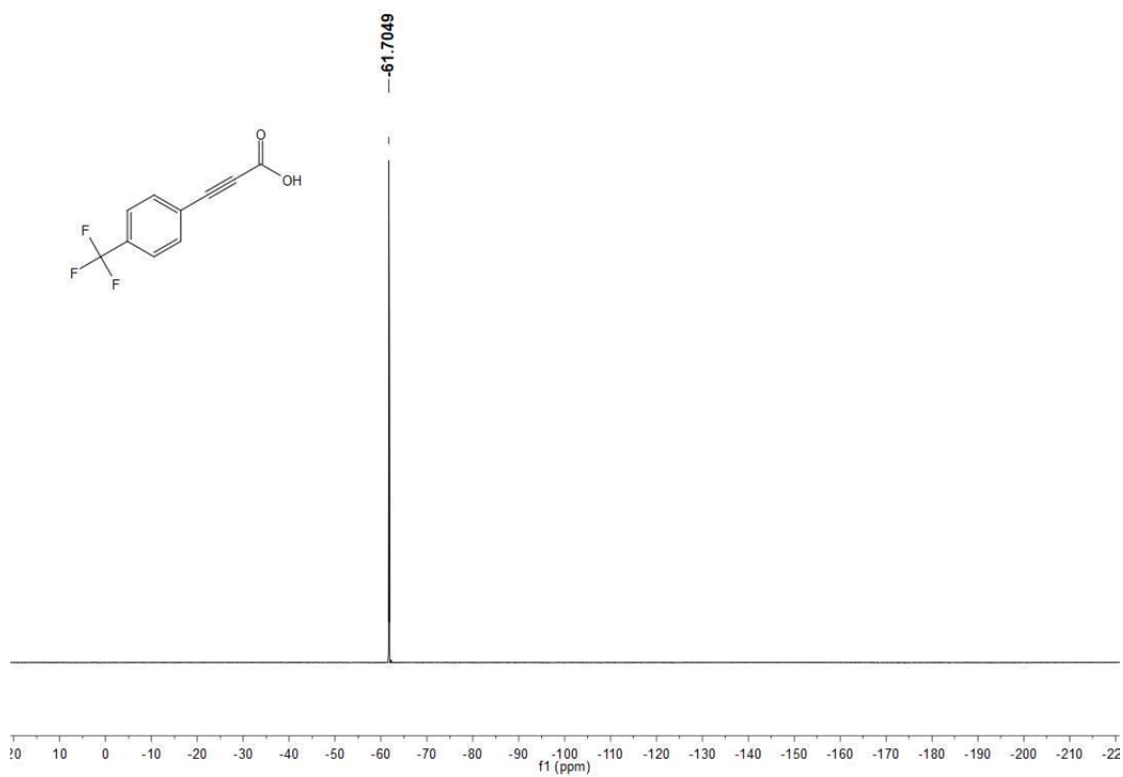

**Fig. S24**  $^{19}\text{F}$  NMR spectrum of **6g** in  $\text{DMSO-}d_6$

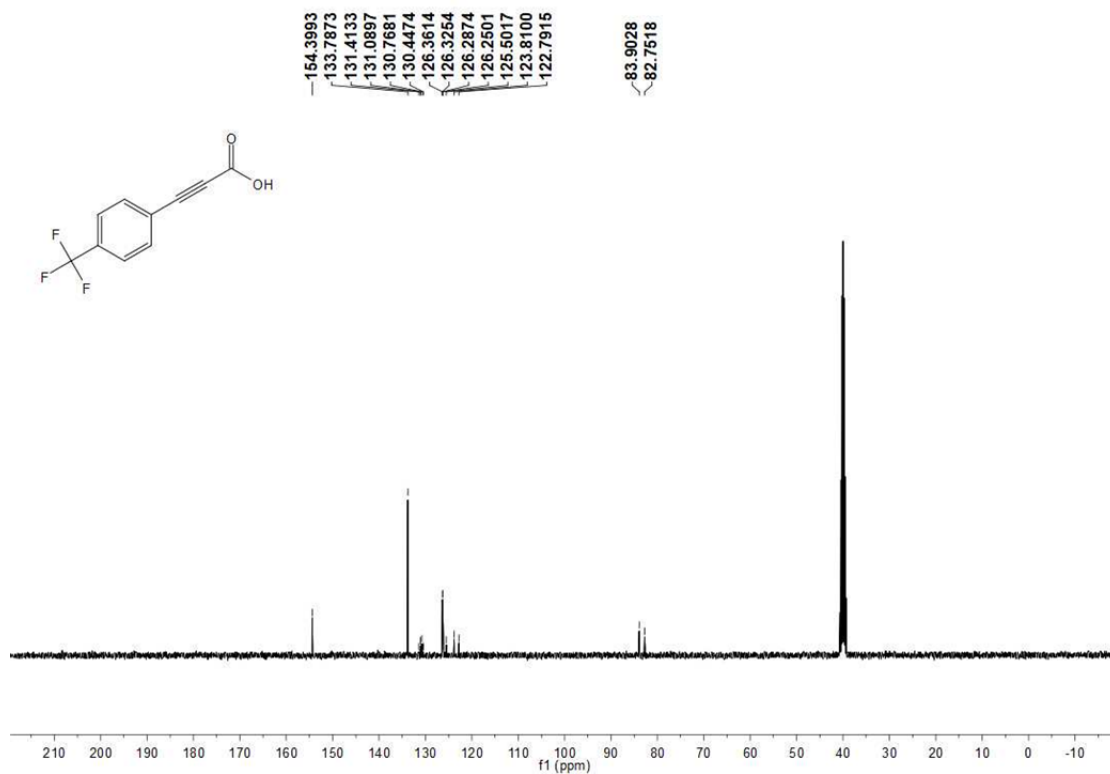

**Fig. S25**  $^{13}\text{C}\{^1\text{H}\}$  NMR spectrum of **6g** in  $\text{DMSO-}d_6$

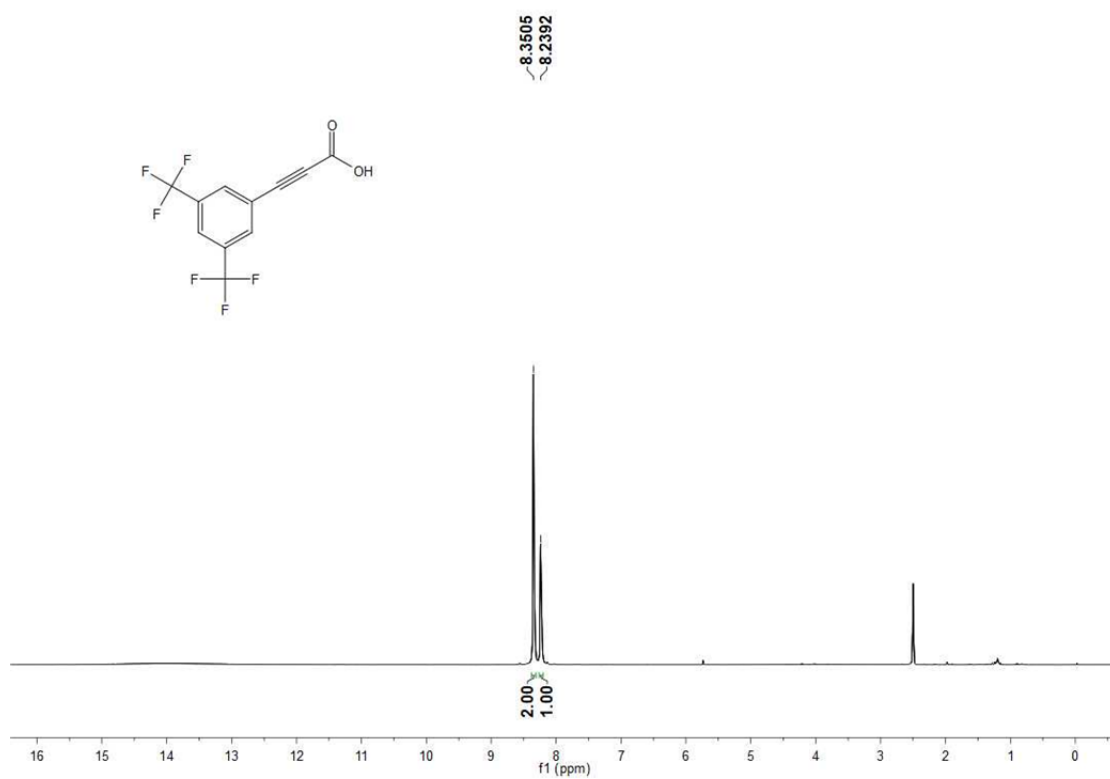

**Fig. S26**  $^1\text{H}$  NMR spectrum of **6h** in  $\text{DMSO-}d_6$

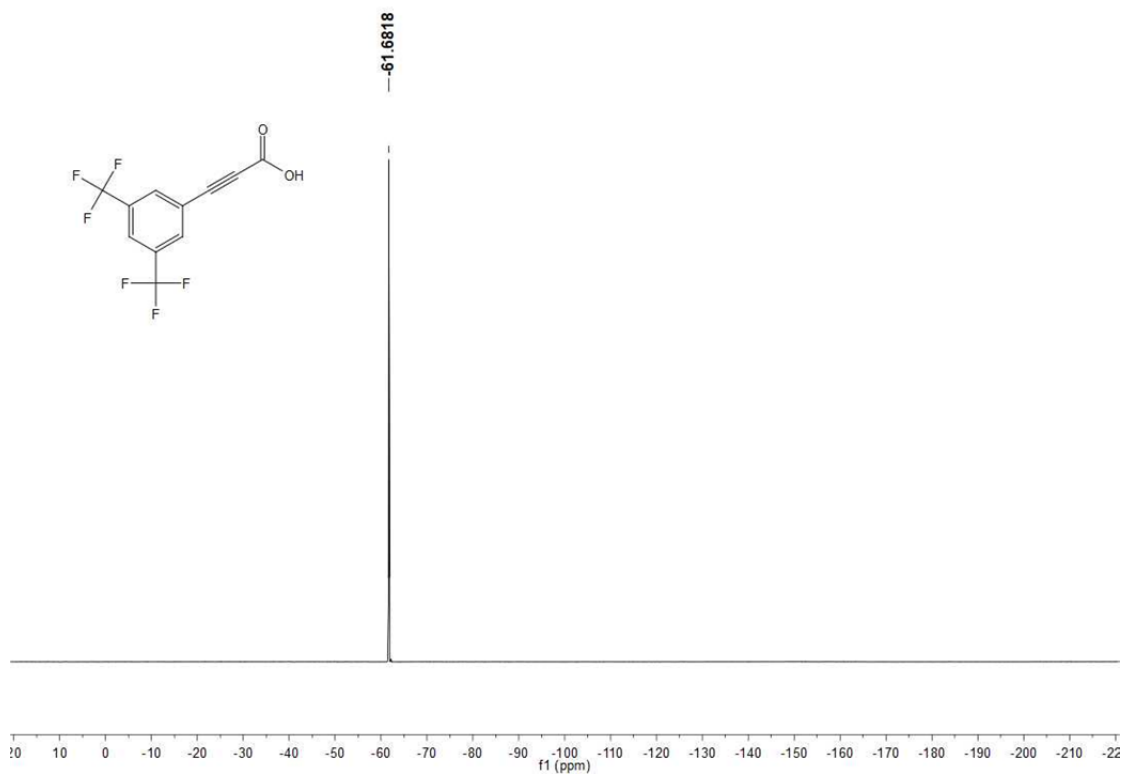

**Fig. S27**  $^{19}\text{F}$  NMR spectrum of **6h** in  $\text{DMSO-}d_6$

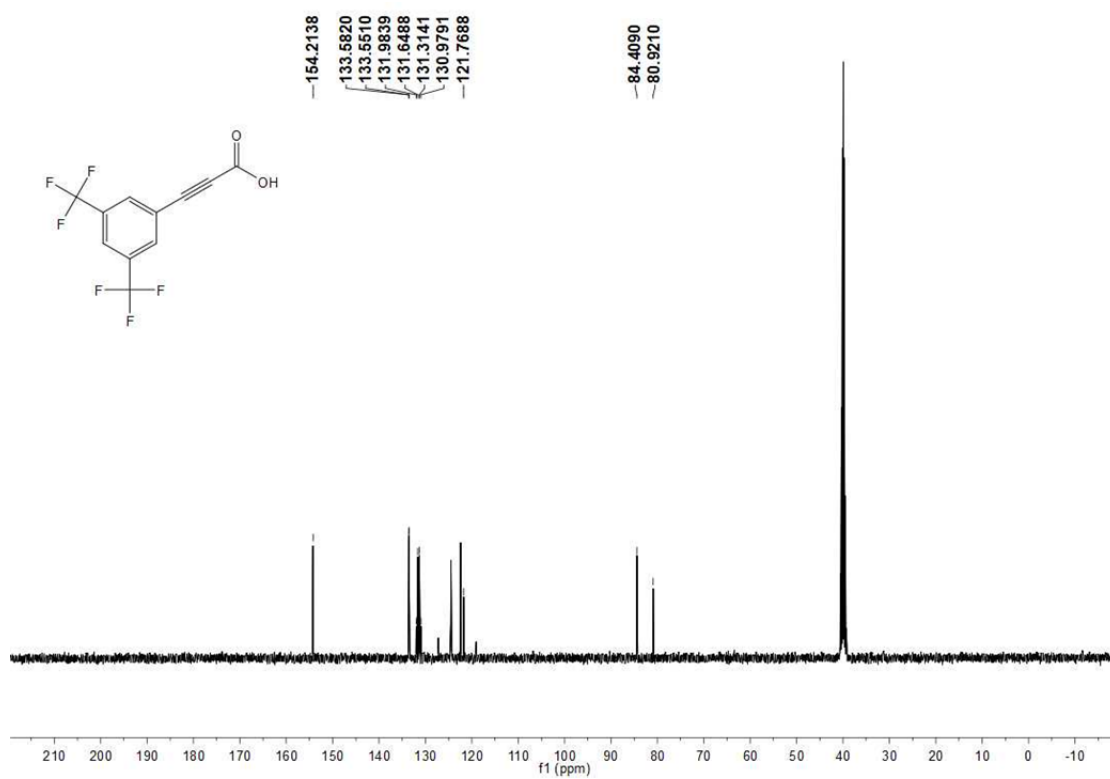

**Fig. S28**  $^{13}\text{C}\{^1\text{H}\}$  NMR spectrum of **6h** in  $\text{DMSO-}d_6$

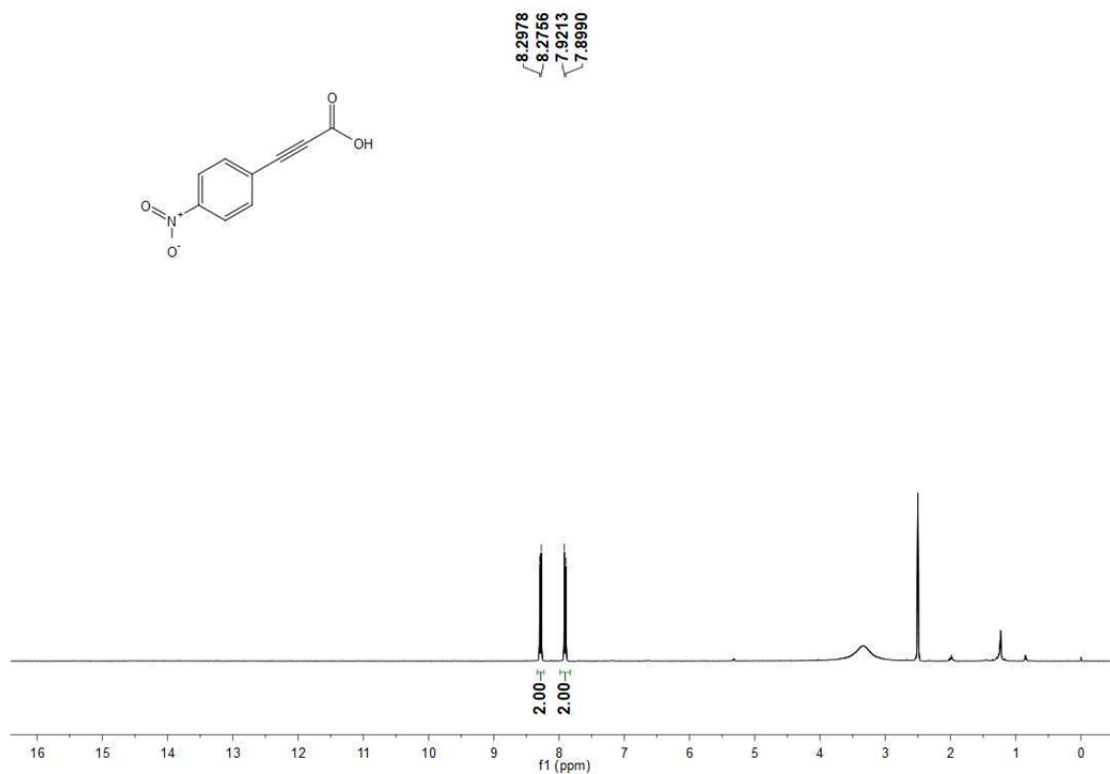

**Fig. S29**  $^1\text{H}$  NMR spectrum of **6i** in  $\text{DMSO-}d_6$

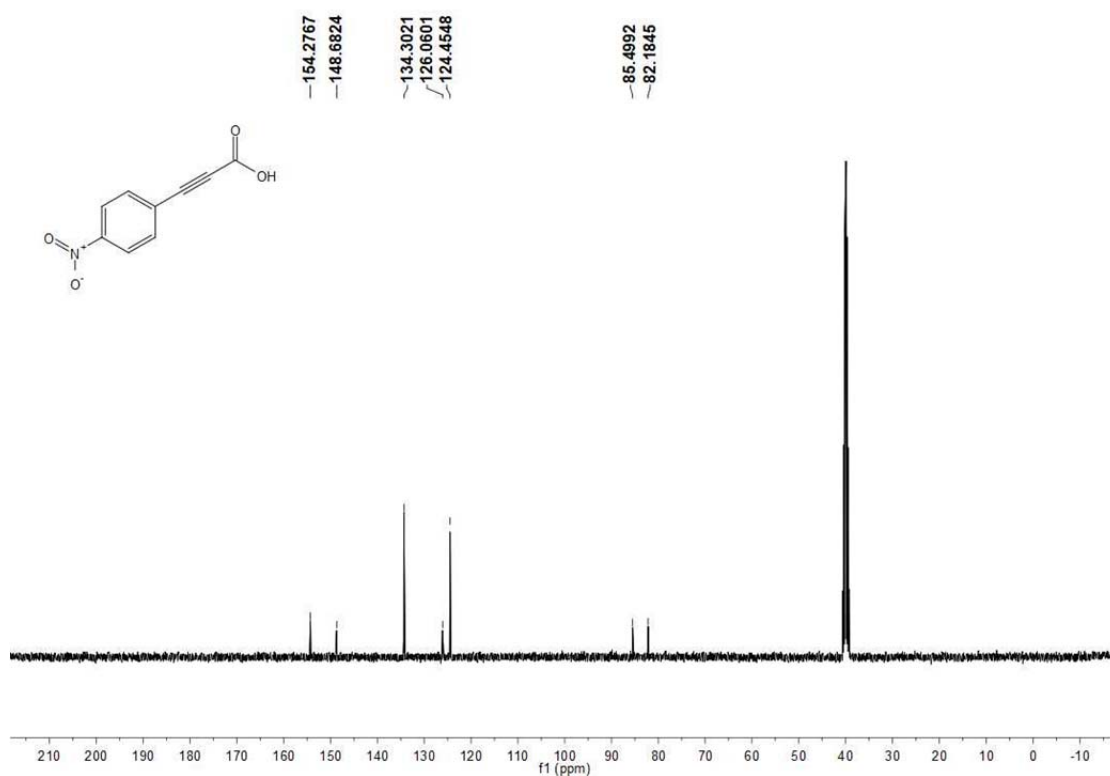

**Fig. S30**  $^{13}\text{C}\{^1\text{H}\}$  NMR spectrum of **6i** in  $\text{DMSO-}d_6$

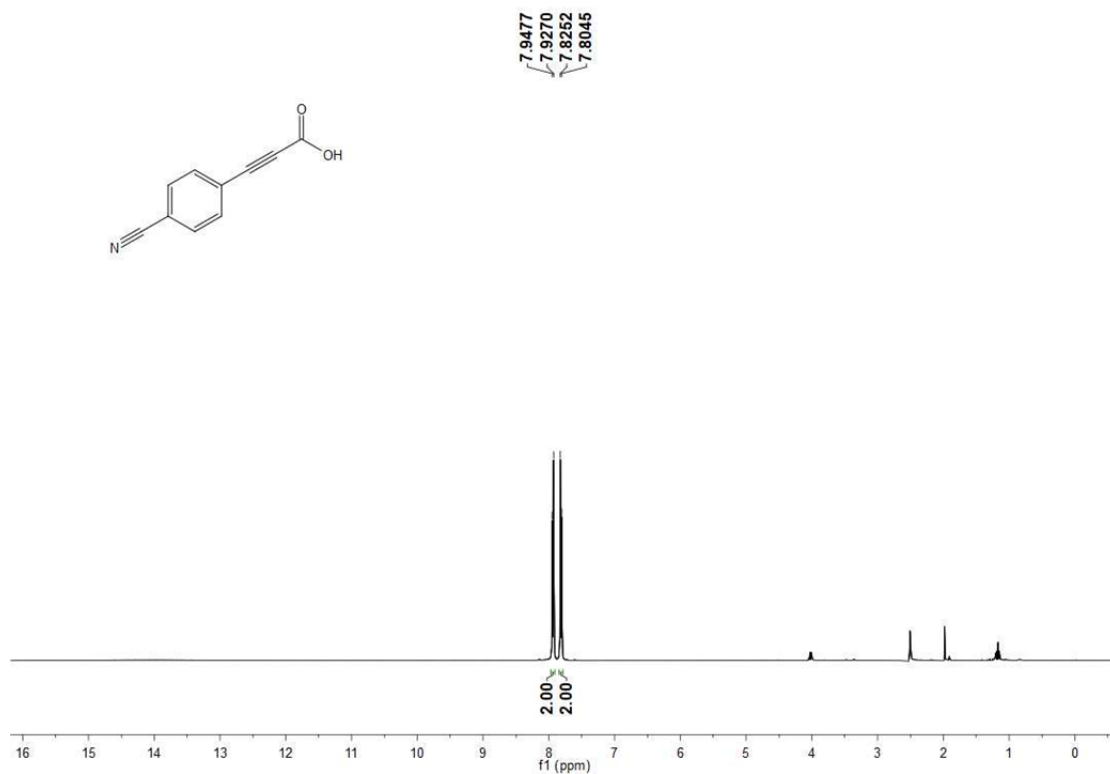

Fig. S31  $^1\text{H}$  NMR spectrum of **6j** in  $\text{DMSO-}d_6$

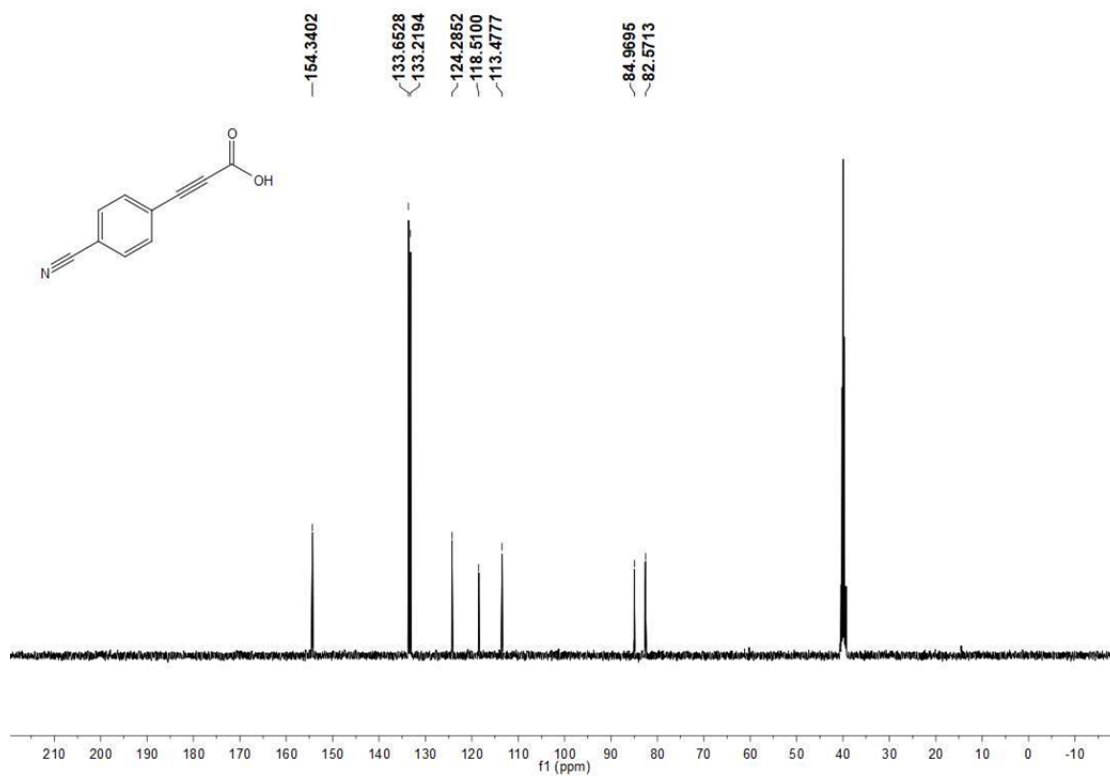

Fig. S32  $^{13}\text{C}\{^1\text{H}\}$  NMR spectrum of **6j** in  $\text{DMSO-}d_6$

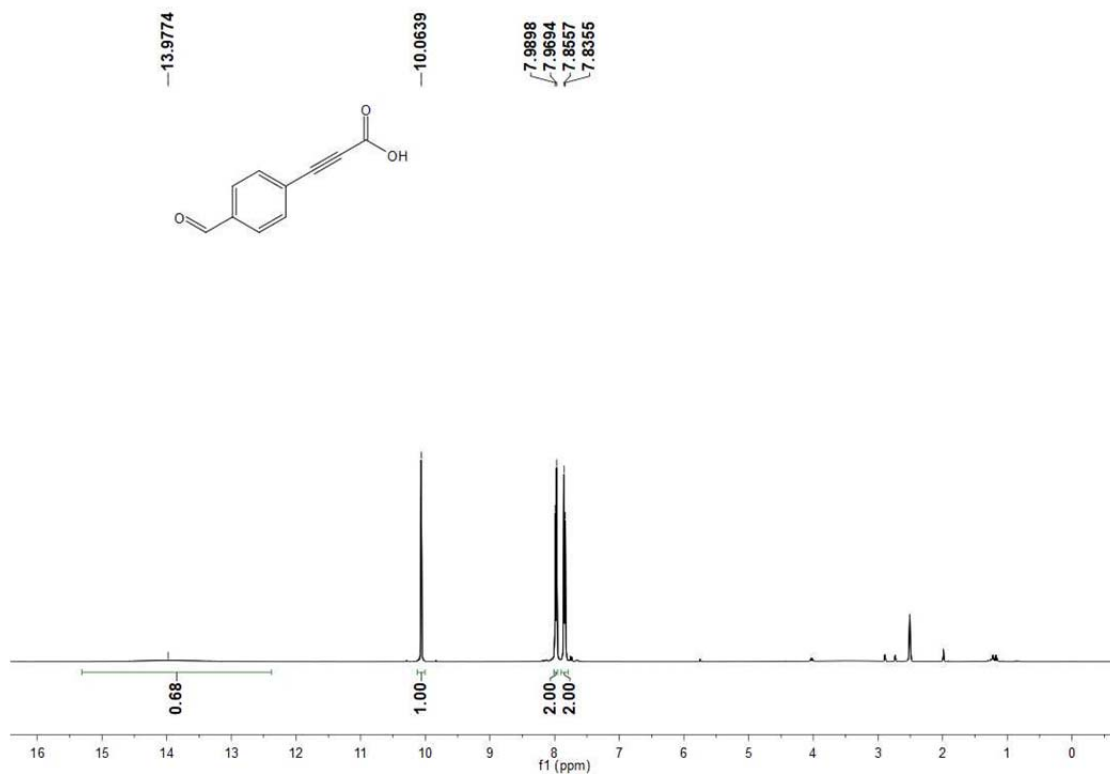

Fig. S33  $^1\text{H}$  NMR spectrum of **6k** in  $\text{DMSO-}d_6$

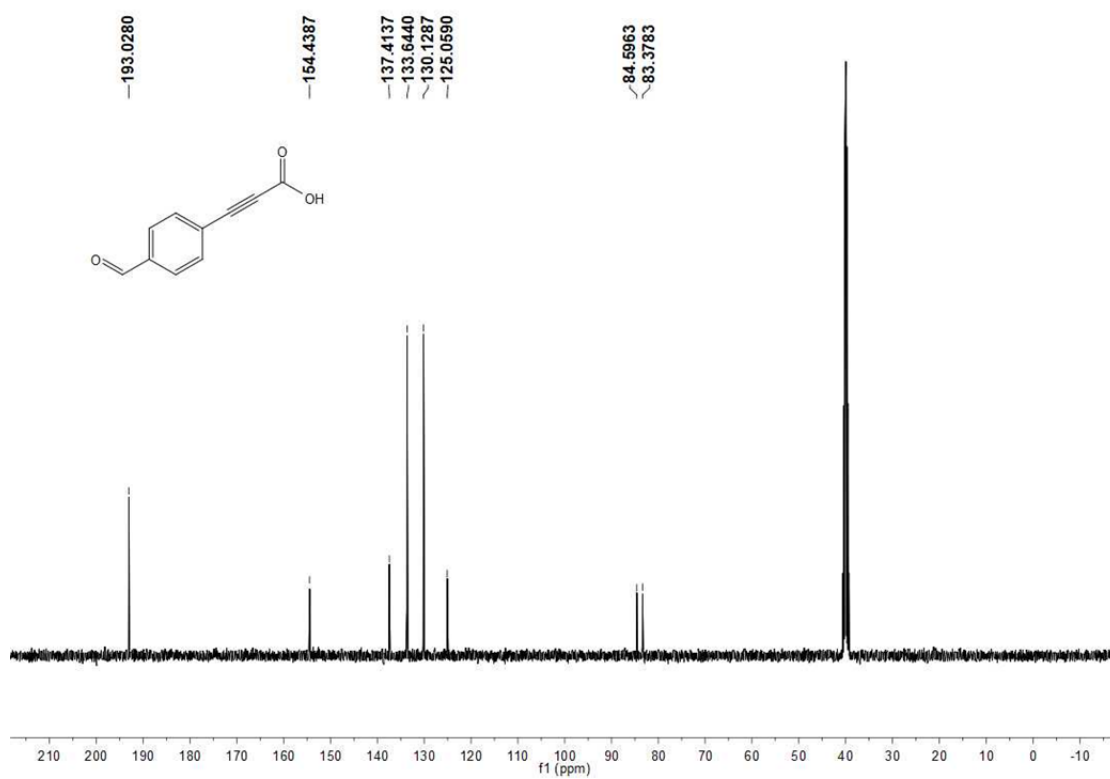

Fig. S34  $^{13}\text{C}\{^1\text{H}\}$  NMR spectrum of **6k** in  $\text{DMSO-}d_6$

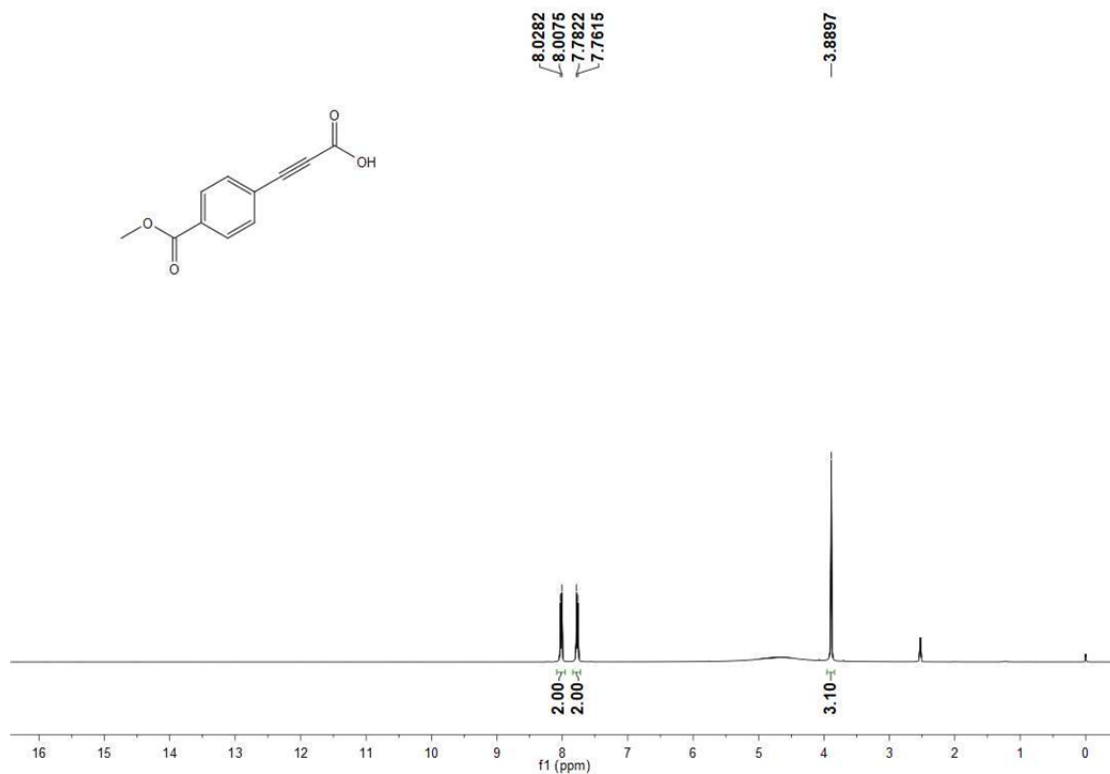

Fig. S35  $^1\text{H}$  NMR spectrum of **6l** in  $\text{DMSO-}d_6$

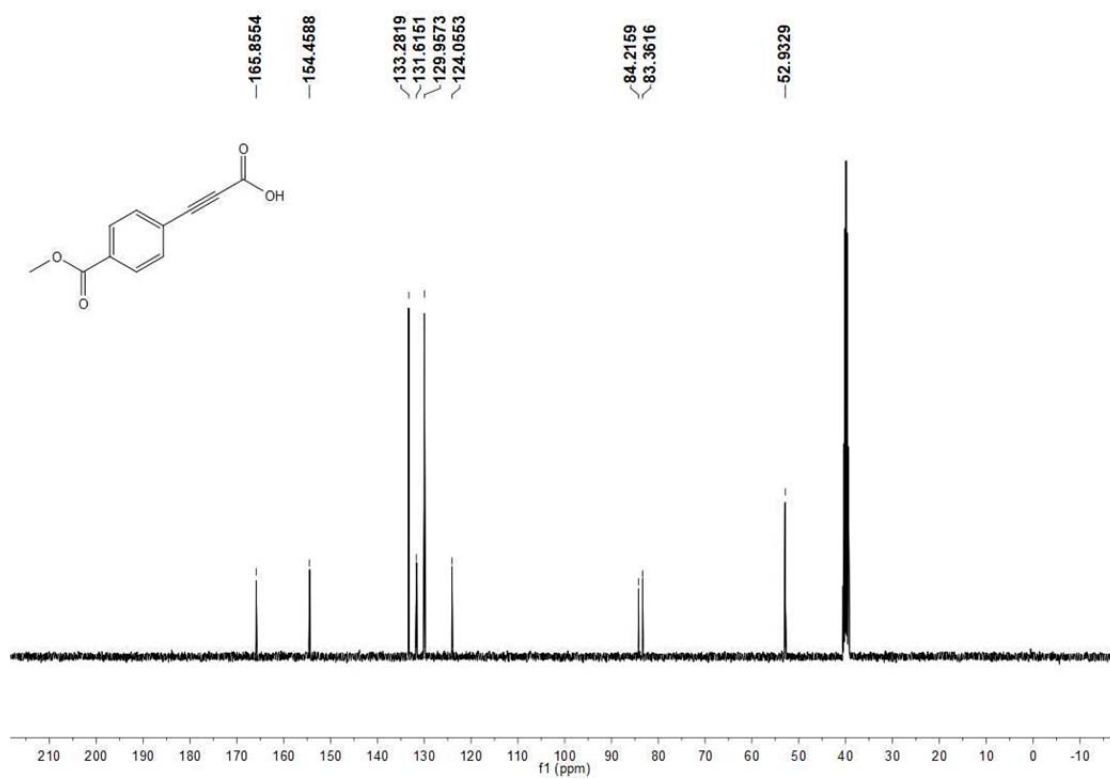

Fig. S36  $^{13}\text{C}\{^1\text{H}\}$  NMR spectrum of **6l** in  $\text{DMSO-}d_6$

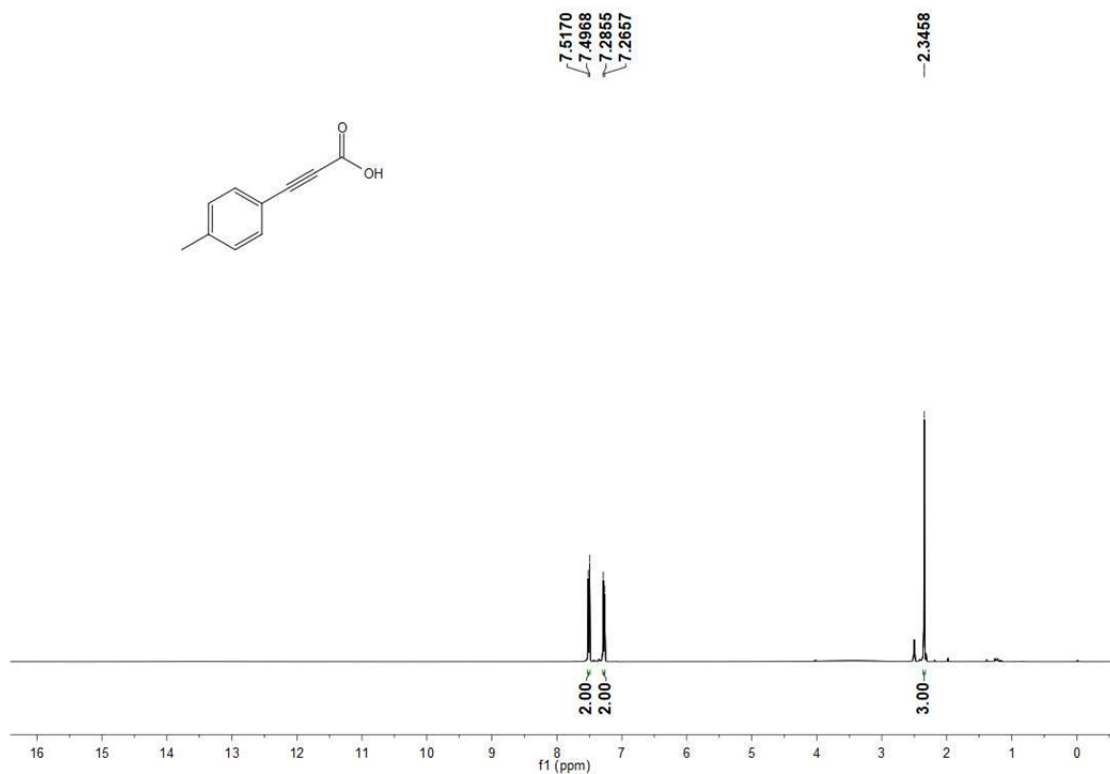

Fig. S37  $^1\text{H}$  NMR spectrum of **6m** in  $\text{DMSO-}d_6$

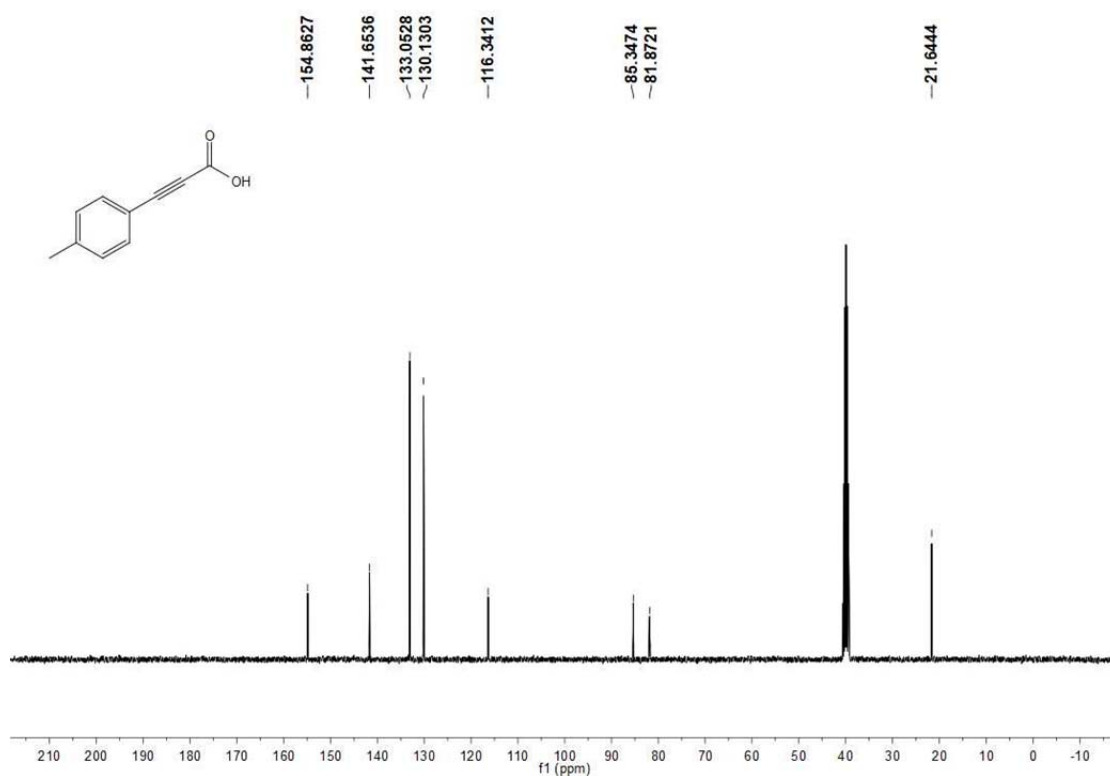

Fig. S38  $^{13}\text{C}\{^1\text{H}\}$  NMR spectrum of **6m** in  $\text{DMSO-}d_6$



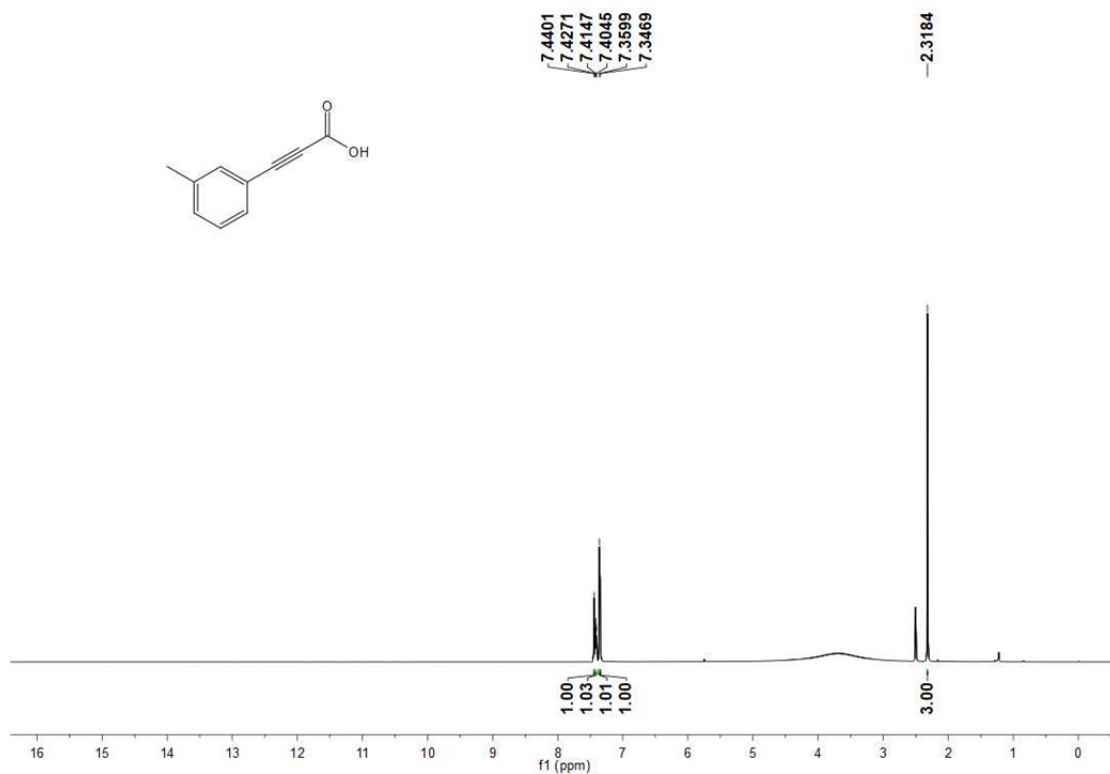

**Fig. S39**  $^1\text{H}$  NMR spectrum of **6n** in  $\text{DMSO-}d_6$

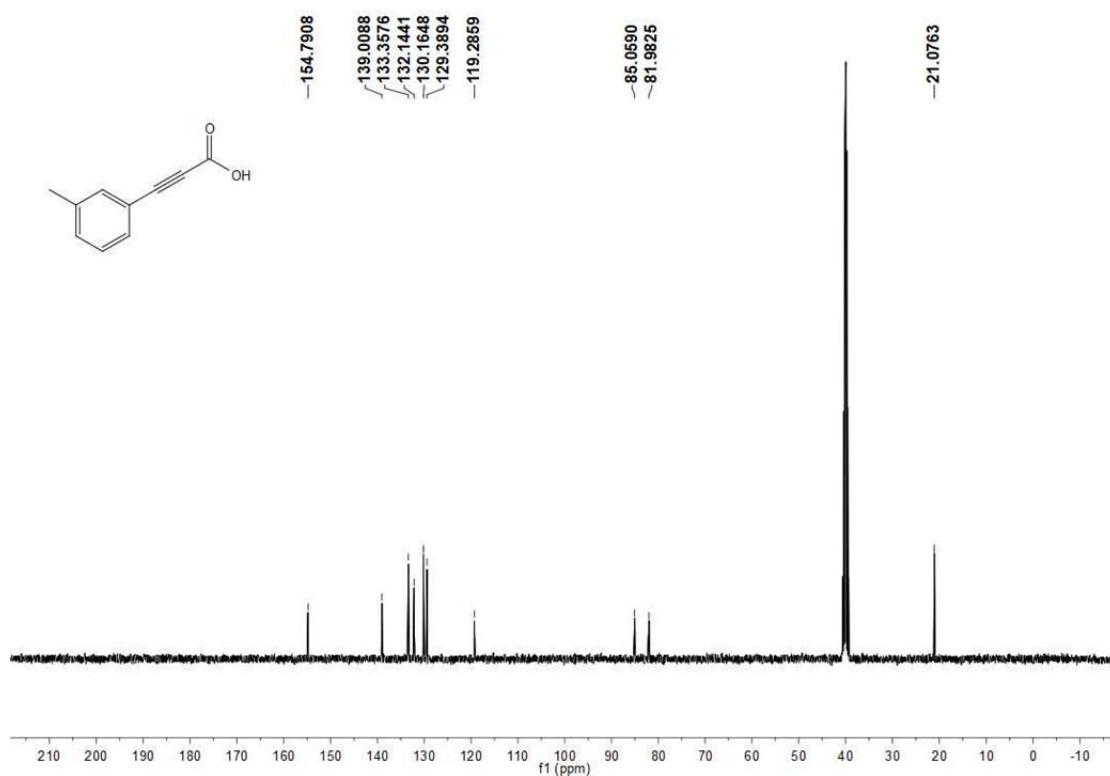

**Fig. S40**  $^{13}\text{C}\{^1\text{H}\}$  NMR spectrum of **6n** in  $\text{DMSO-}d_6$

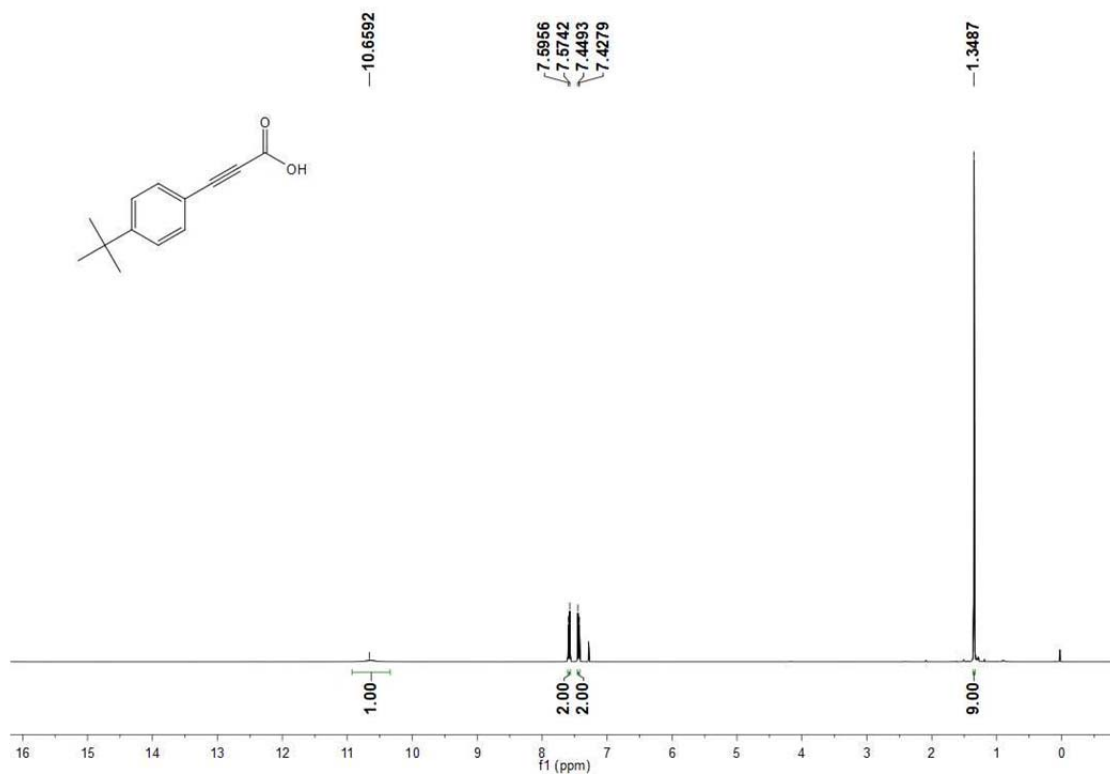

**Fig. S41**  $^1\text{H}$  NMR spectrum of **6o** in  $\text{CDCl}_3$

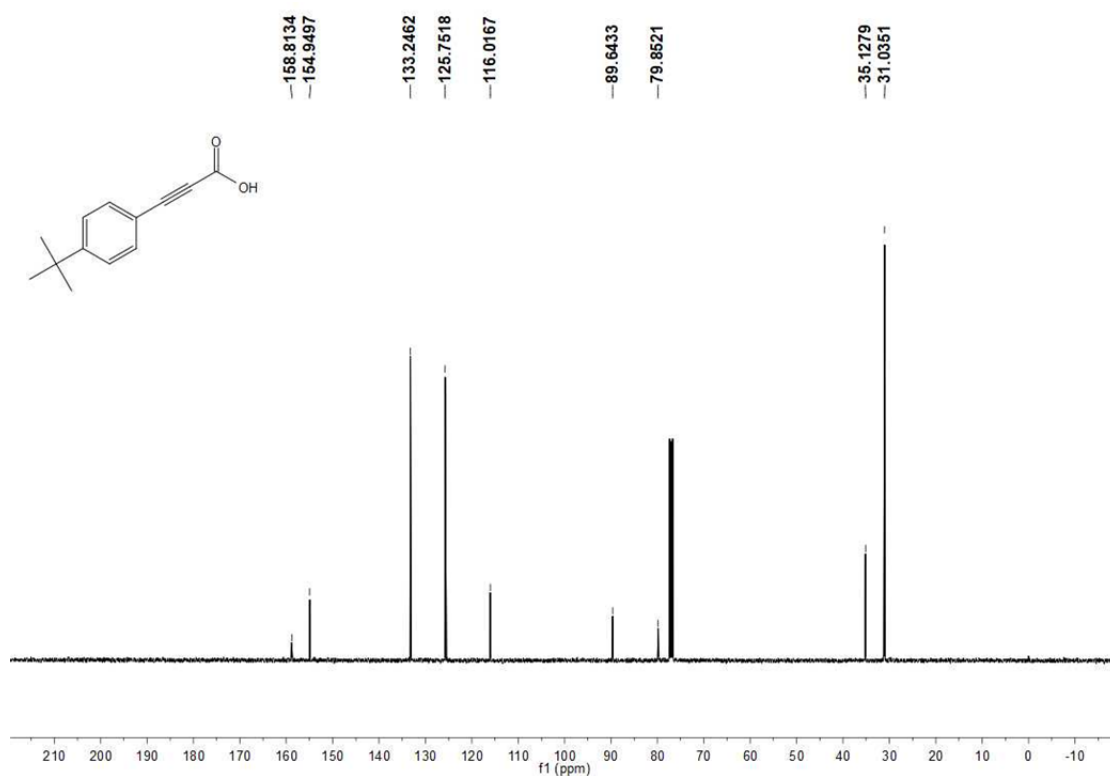

**Fig. S42**  $^{13}\text{C}\{^1\text{H}\}$  NMR spectrum of **6o** in  $\text{DMSO-}d_6$

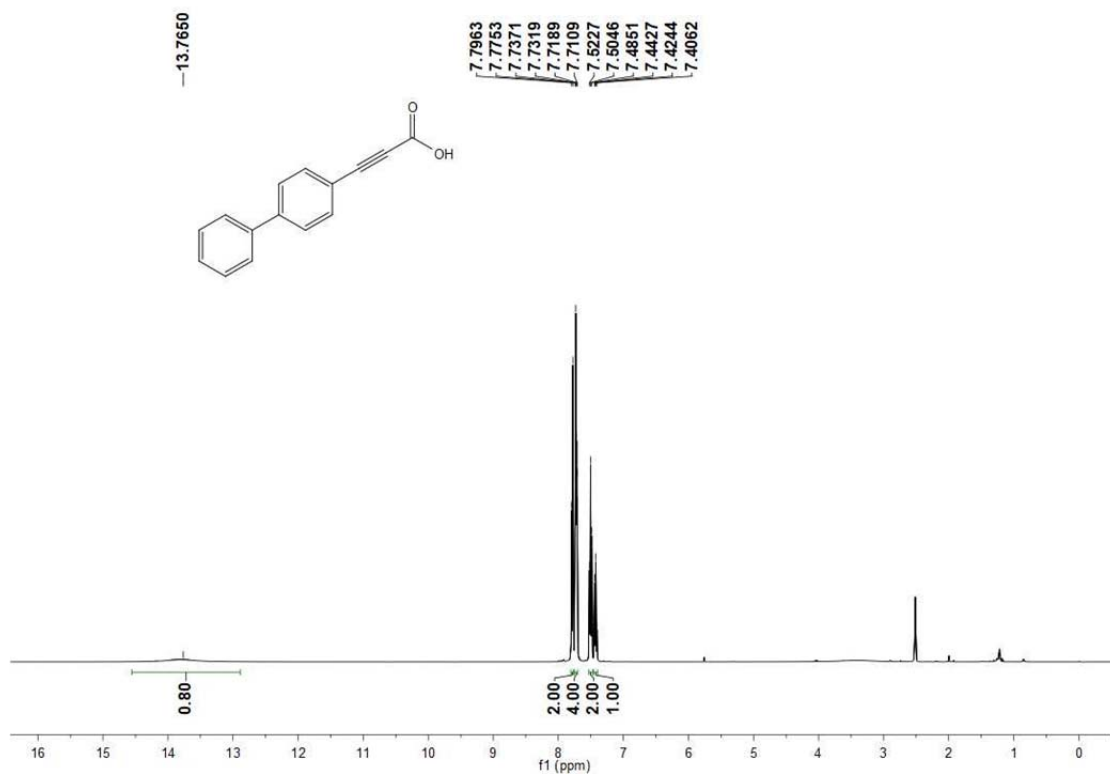

Fig. S43  $^1\text{H}$  NMR spectrum of **6p** in  $\text{DMSO-}d_6$

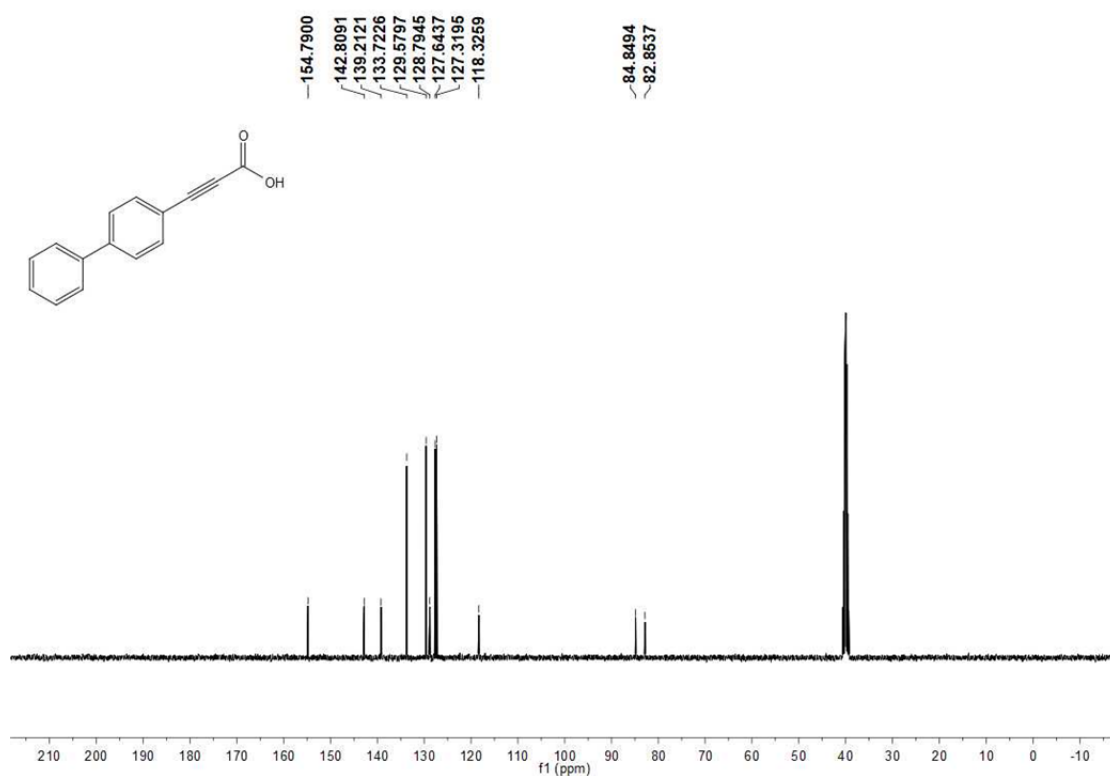

Fig. S44  $^{13}\text{C}\{^1\text{H}\}$  NMR spectrum of **6p** in  $\text{DMSO-}d_6$

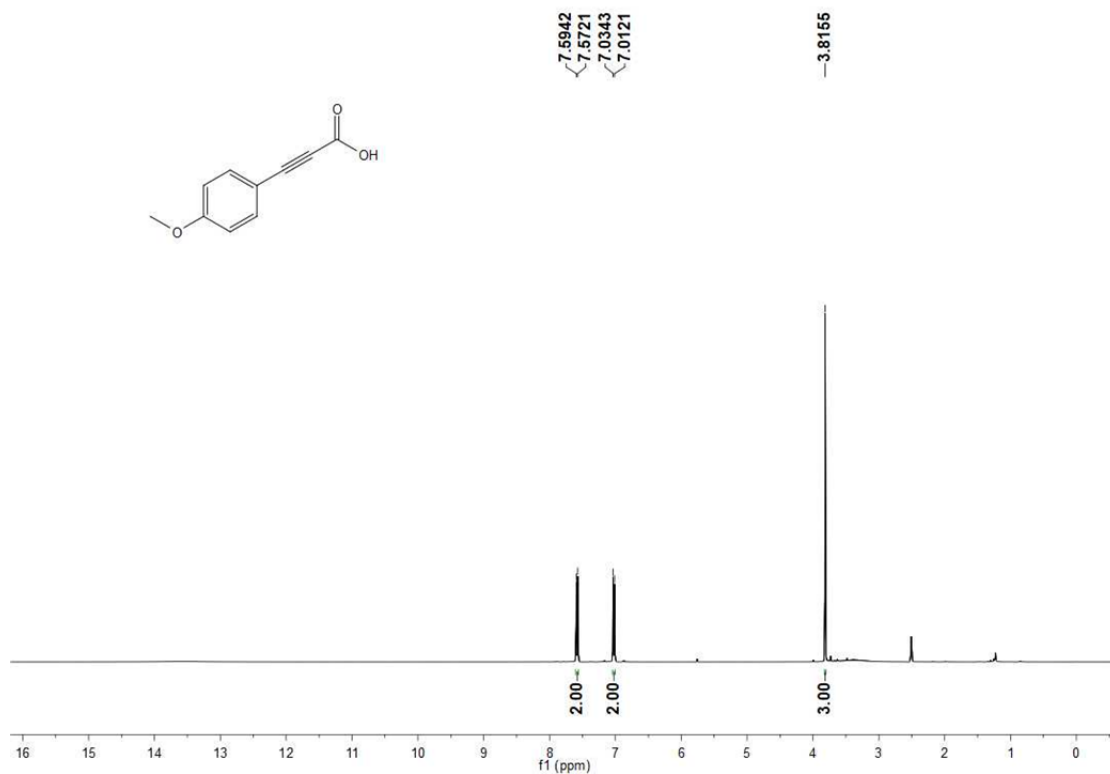

Fig. S45  $^1\text{H}$  NMR spectrum of 6q in  $\text{DMSO-}d_6$

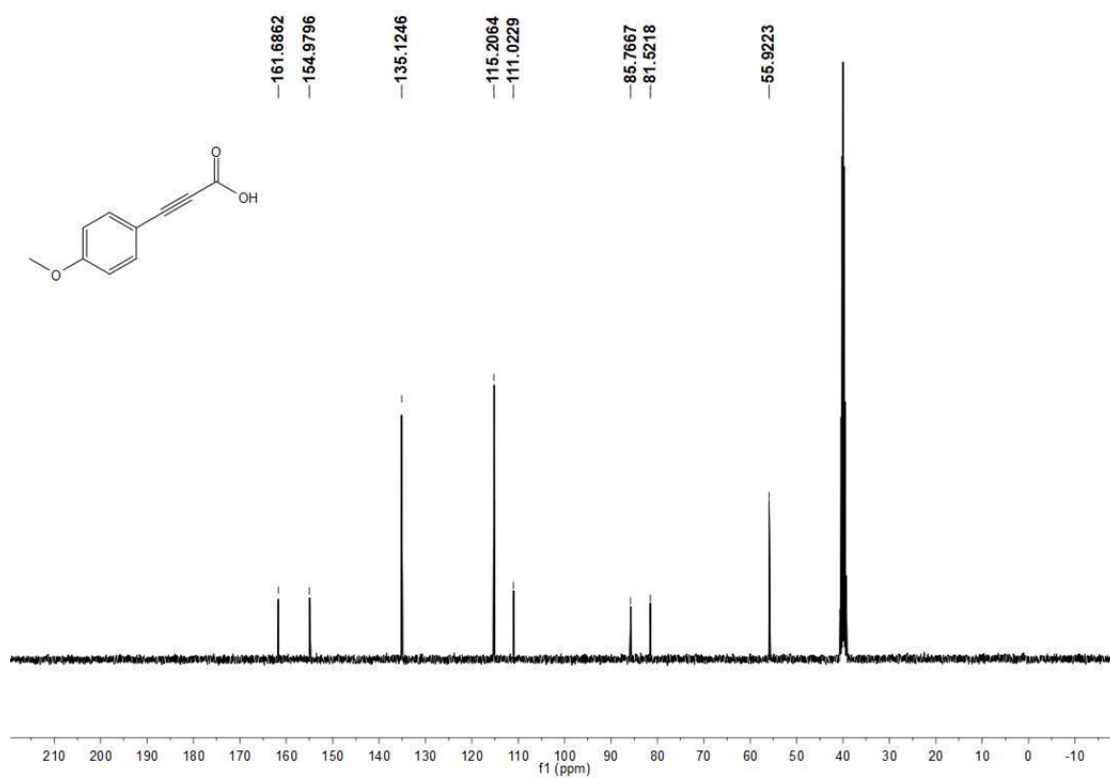

Fig. S46  $^{13}\text{C}\{^1\text{H}\}$  NMR spectrum of 6q in  $\text{DMSO-}d_6$

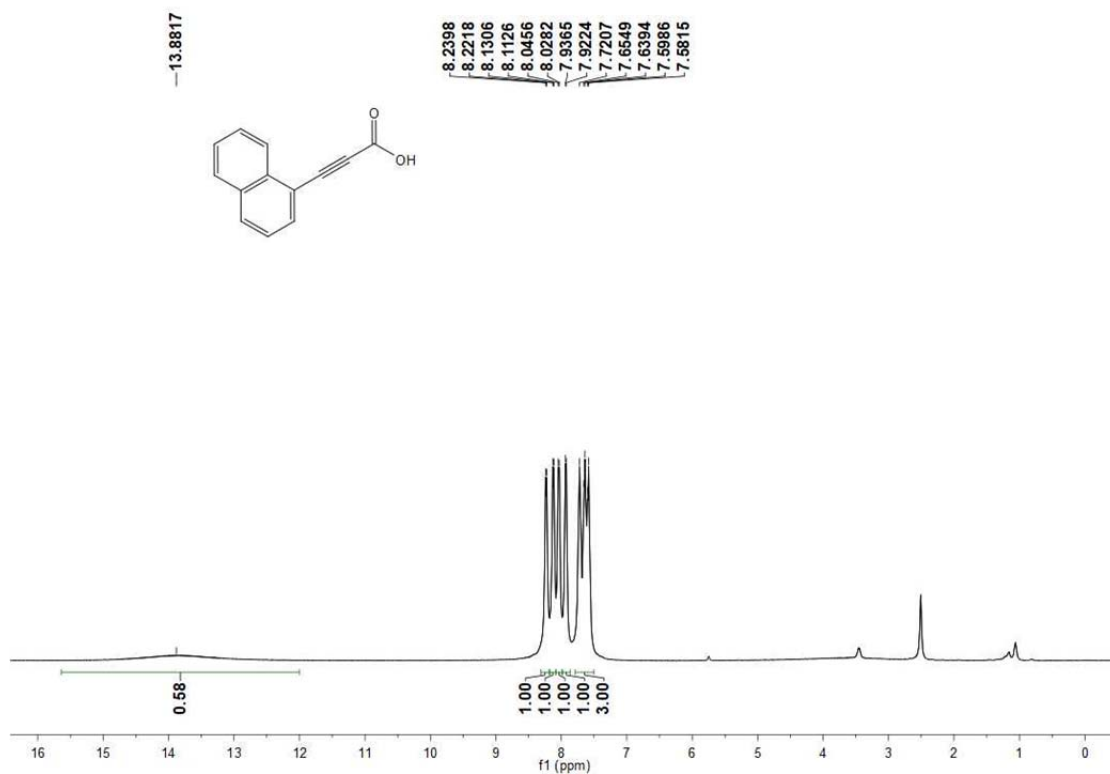

Fig. S47  $^1\text{H NMR}$  spectrum of **6r** in  $\text{DMSO-}d_6$

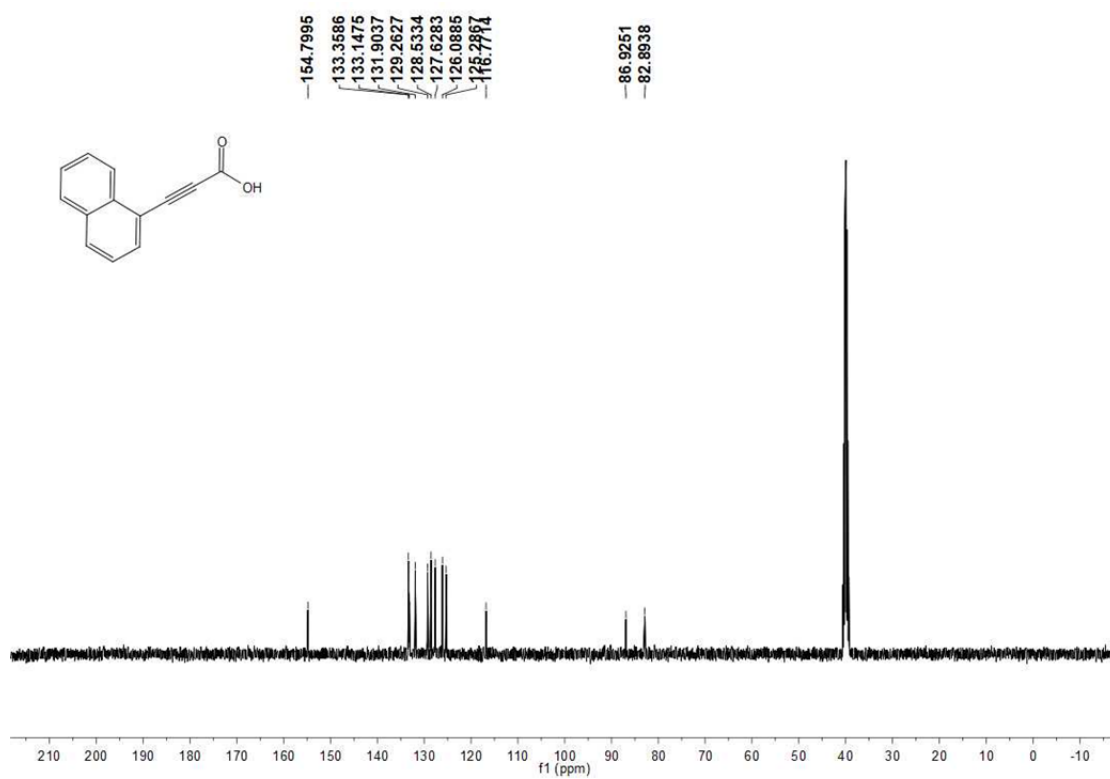

Fig. S48  $^{13}\text{C}\{^1\text{H}\}$  NMR spectrum of **6r** in  $\text{DMSO-}d_6$

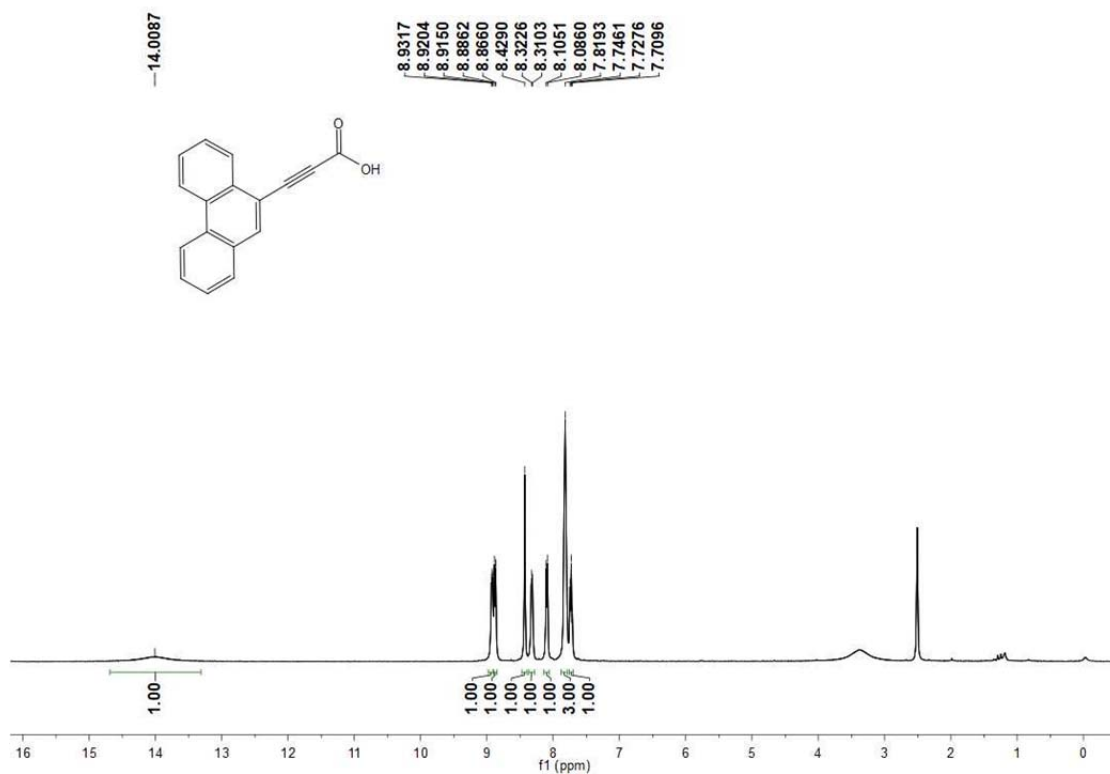

**Fig. S49**  $^1\text{H}$  NMR spectrum of **6s** in  $\text{DMSO-}d_6$

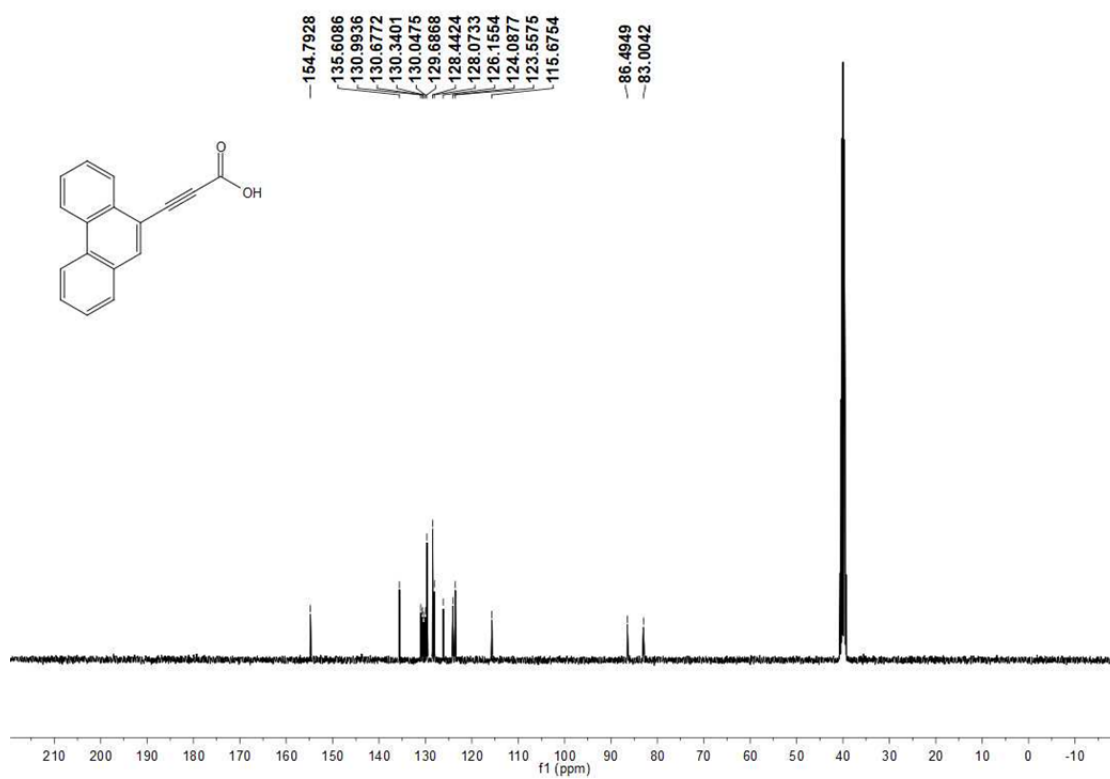

**Fig. S50**  $^{13}\text{C}\{^1\text{H}\}$  NMR spectrum of **6s** in  $\text{DMSO-}d_6$

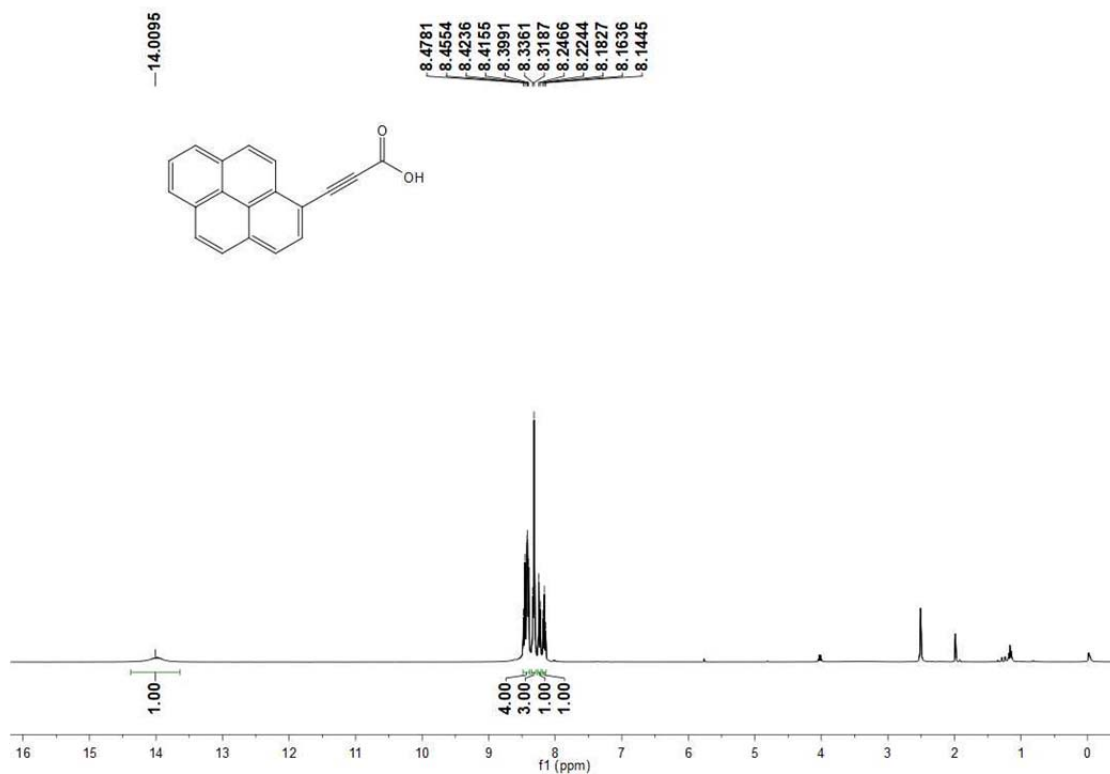

**Fig. S51**  $^1\text{H}$  NMR spectrum of **6t** in  $\text{DMSO-}d_6$

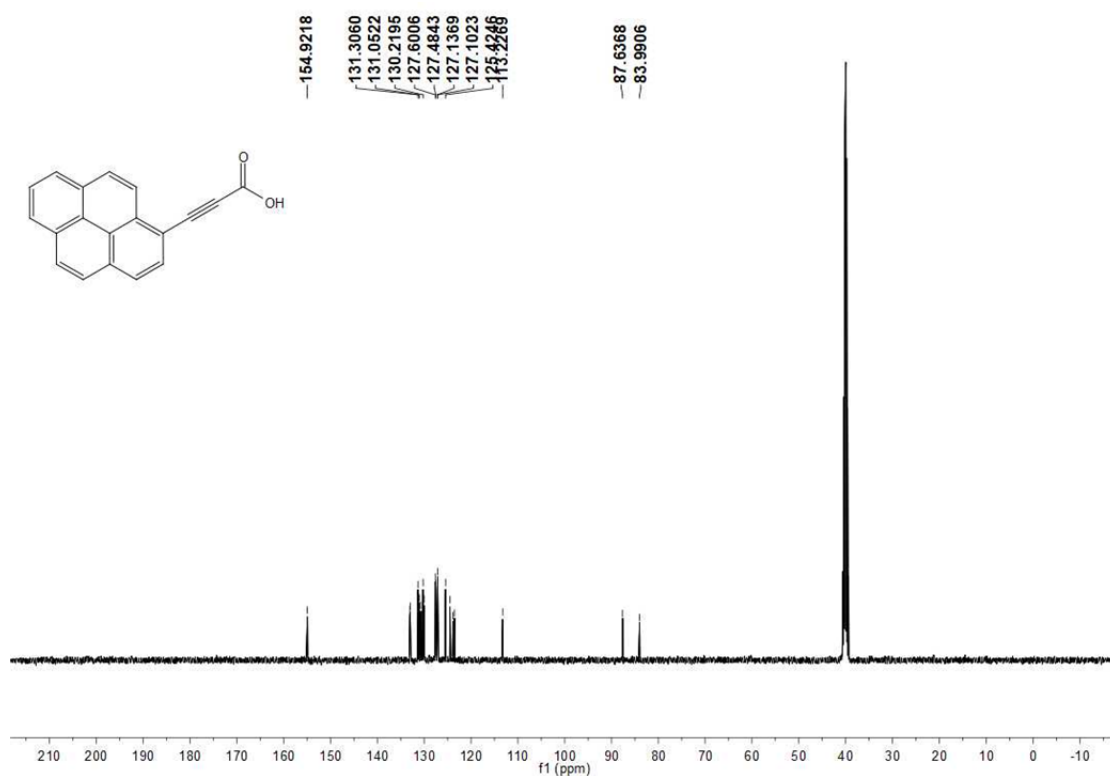

**Fig. S52**  $^{13}\text{C}\{^1\text{H}\}$  NMR spectrum of **6t** in  $\text{DMSO-}d_6$

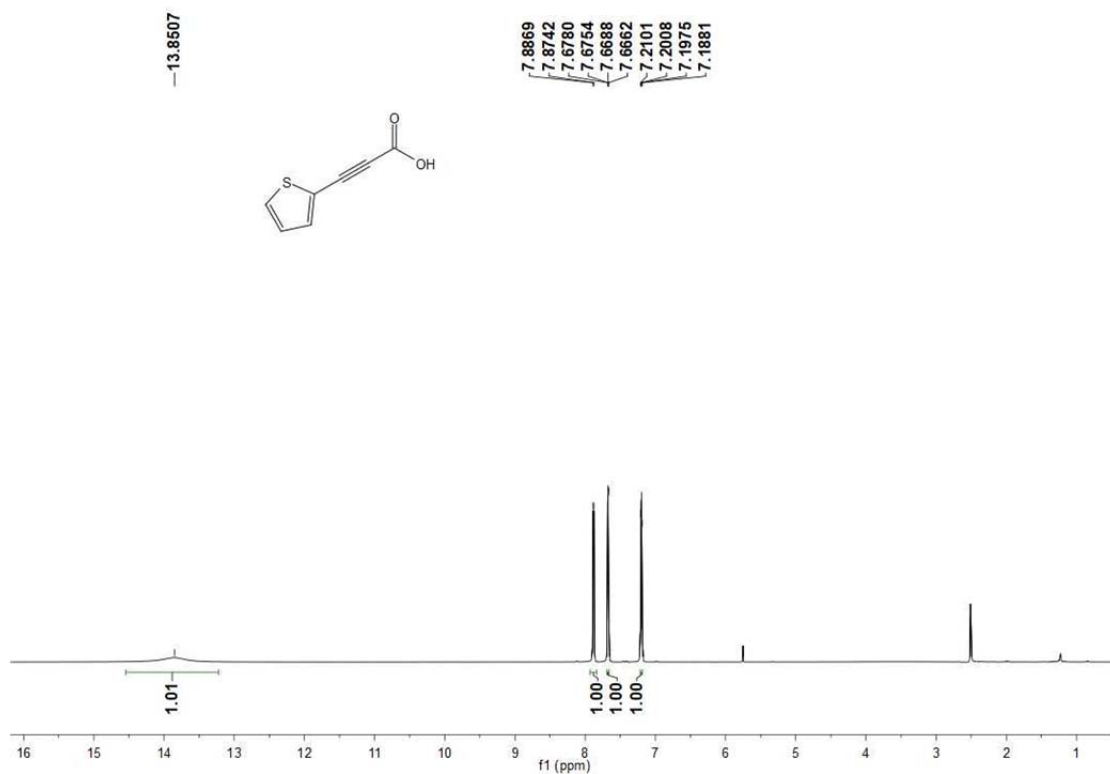

**Fig. S53**  $^1\text{H}$  NMR spectrum of **6u** in  $\text{DMSO-}d_6$

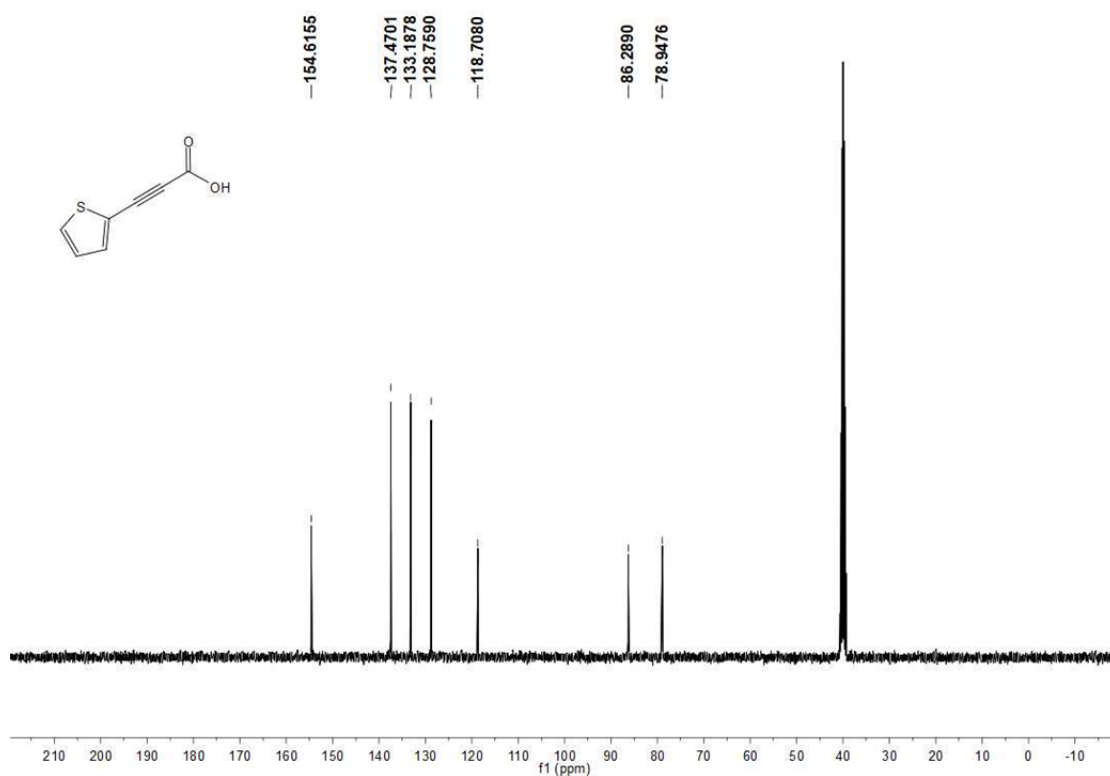

**Fig. S54**  $^{13}\text{C}\{^1\text{H}\}$  NMR spectrum of **6u** in  $\text{DMSO-}d_6$



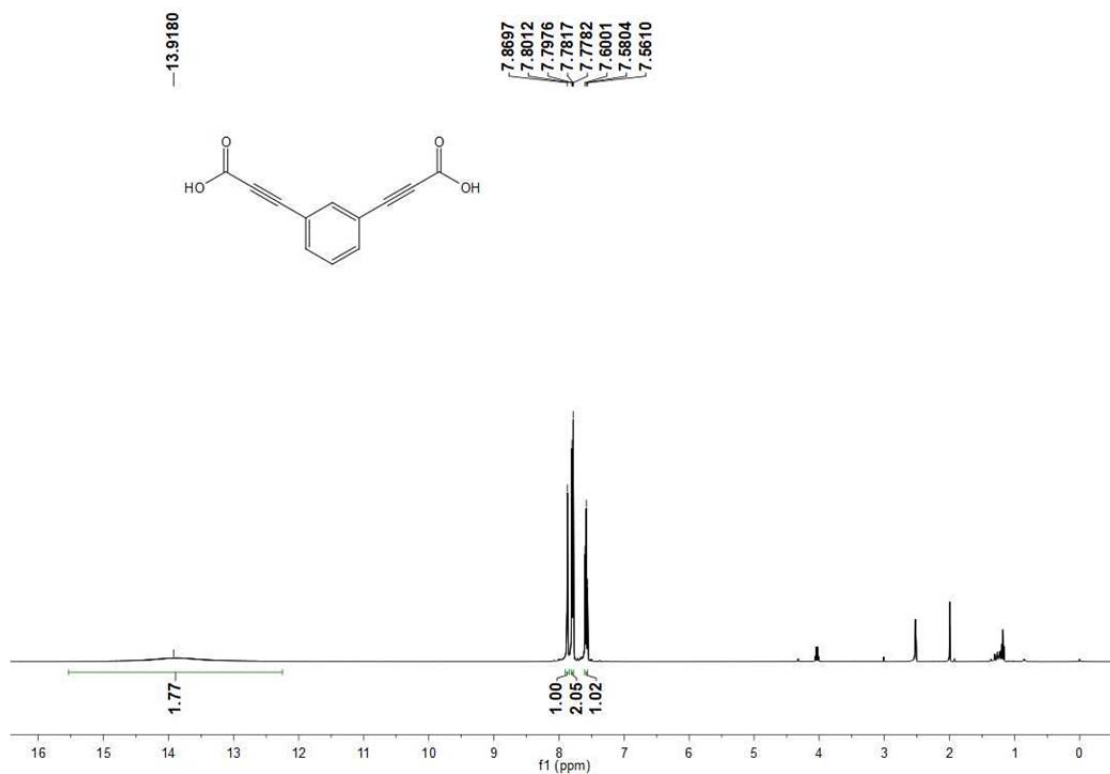

**Fig. S55**  $^1\text{H}$  NMR spectrum of **6v** in  $\text{DMSO-}d_6$

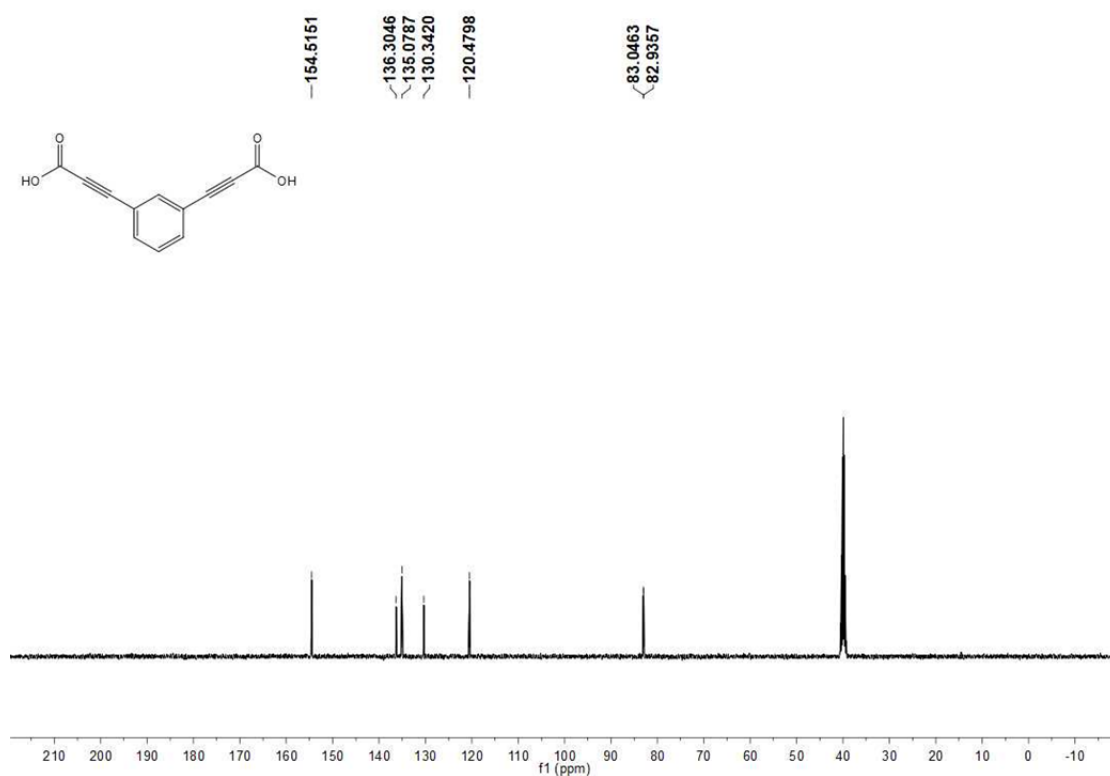

**Fig. S56**  $^{13}\text{C}\{^1\text{H}\}$  NMR spectrum of **6v** in  $\text{DMSO-}d_6$

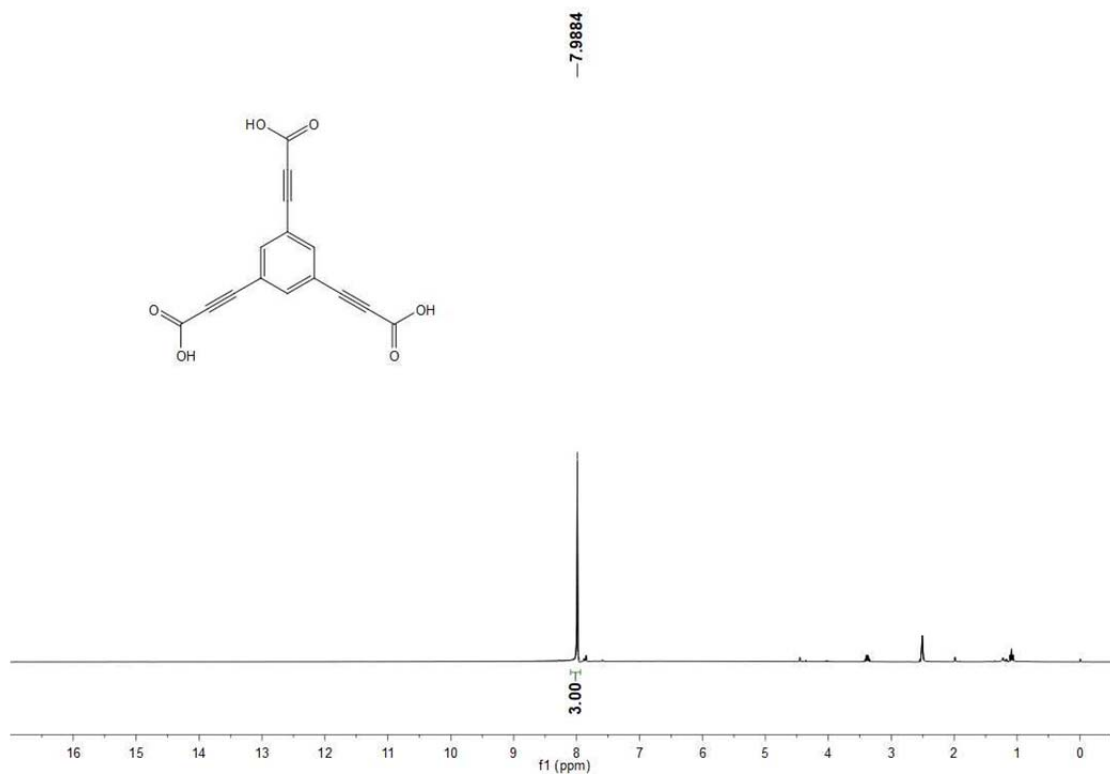

Fig. S57  $^1\text{H}$  NMR spectrum of **6w** in  $\text{DMSO-}d_6$

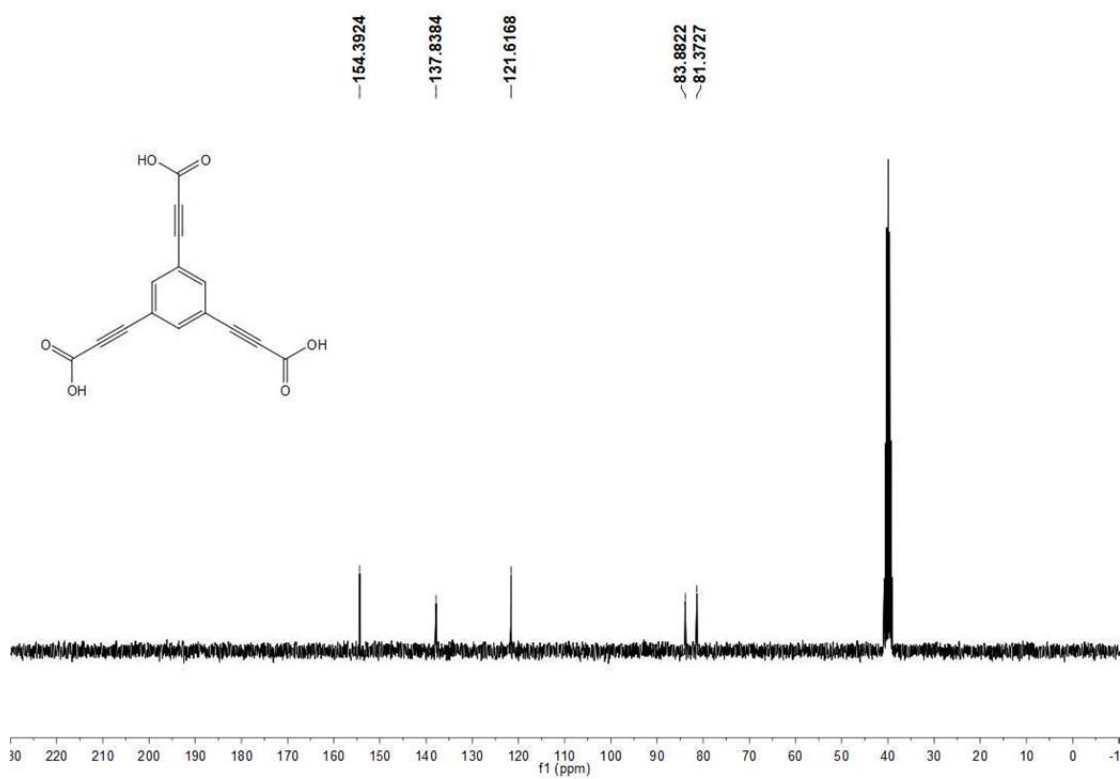

Fig. S58  $^{13}\text{C}$   $\{^1\text{H}\}$  NMR spectrum of **6w** in  $\text{DMSO-}d_6$

## NMR spectra of the esters of propiolic acids

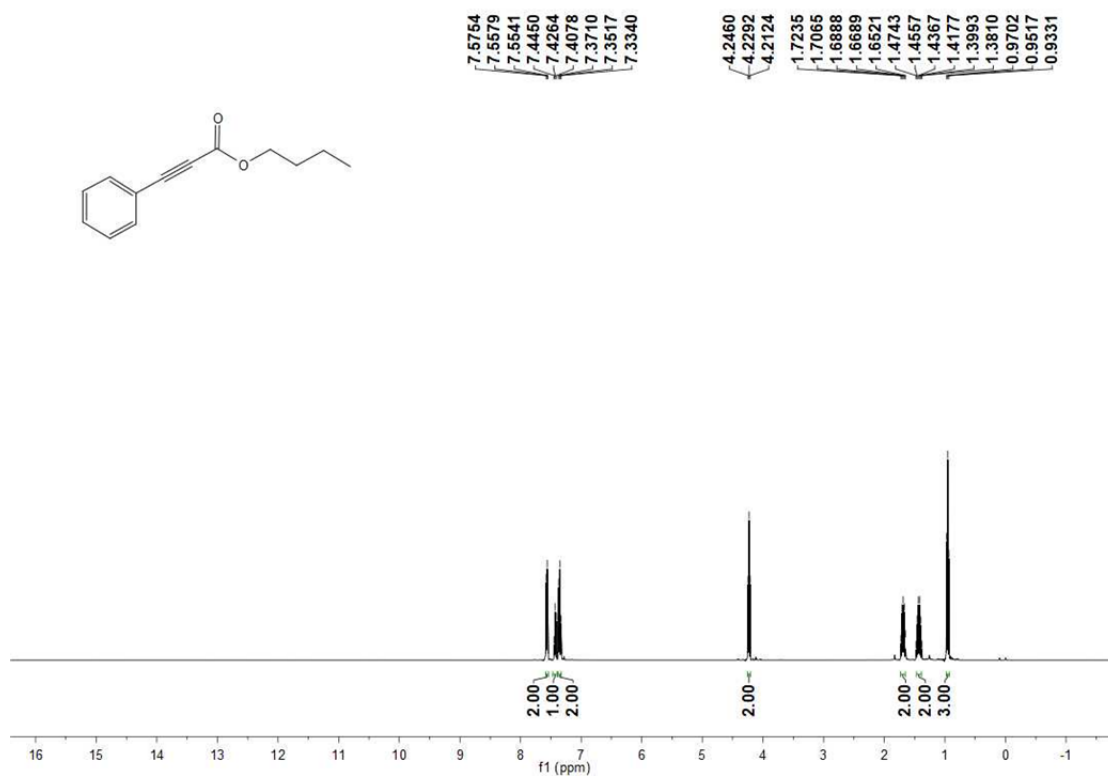

Fig. S59 <sup>1</sup>H NMR spectrum of 7a in CDCl<sub>3</sub>

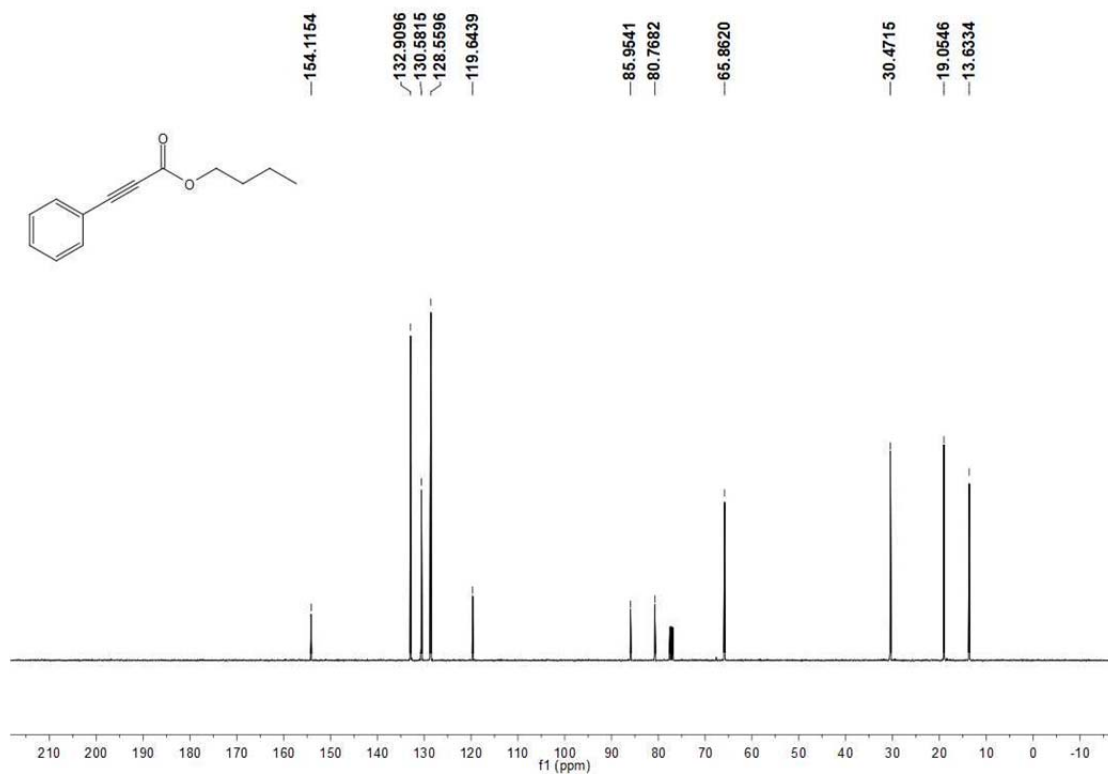

Fig. S60 <sup>13</sup>C {<sup>1</sup>H} NMR spectrum of 7a in CDCl<sub>3</sub>

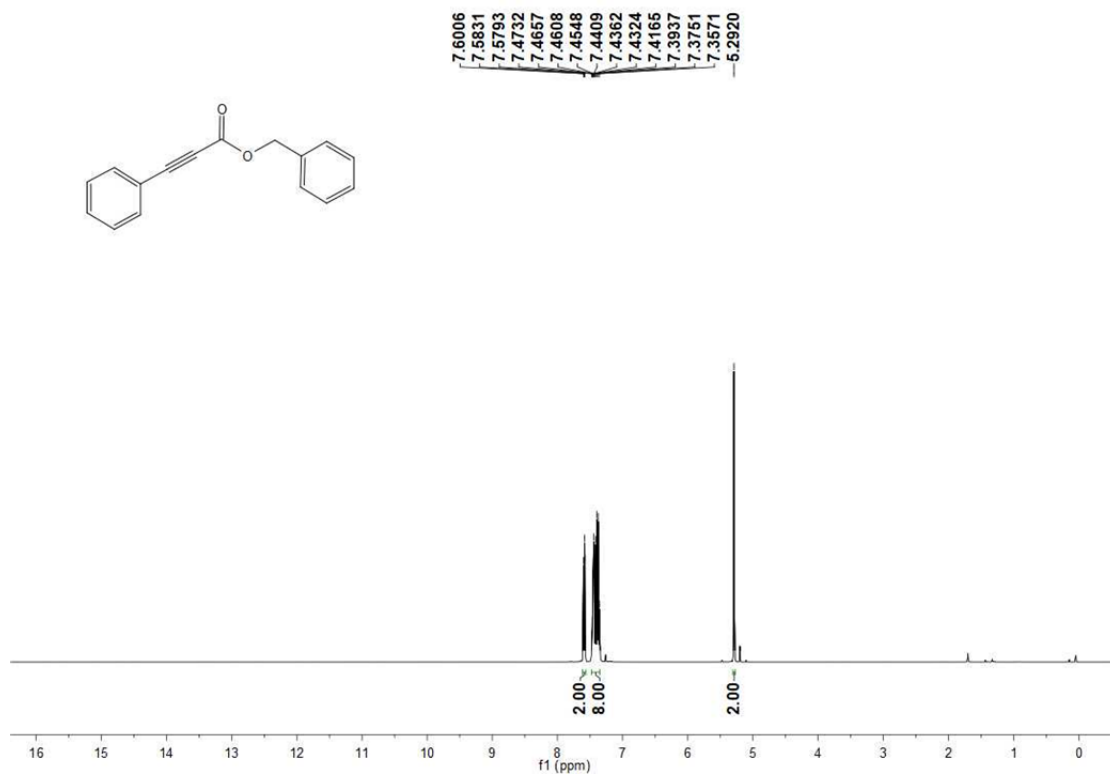

**Fig. S61**  $^1\text{H}$  NMR spectrum of **7b** in  $\text{CDCl}_3$

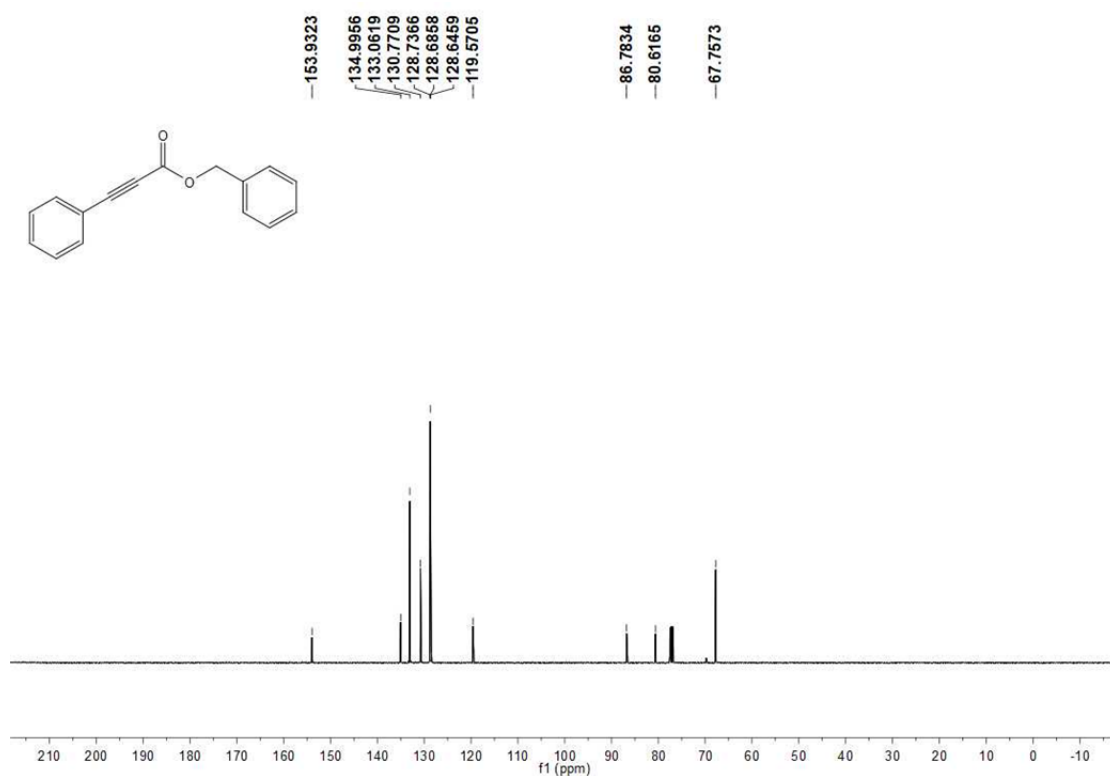

**Fig. S62**  $^{13}\text{C}\{^1\text{H}\}$  NMR spectrum of **7b** in  $\text{CDCl}_3$

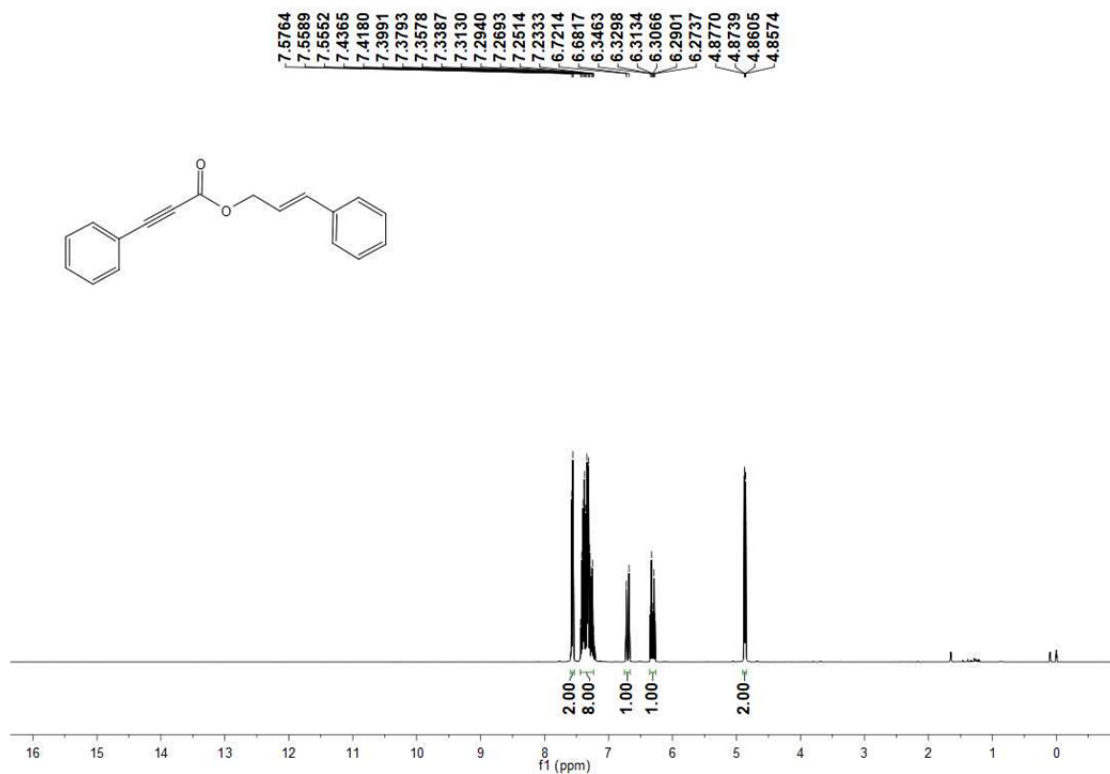

Fig. S63  $^1\text{H}$  NMR spectrum of 7c in  $\text{CDCl}_3$

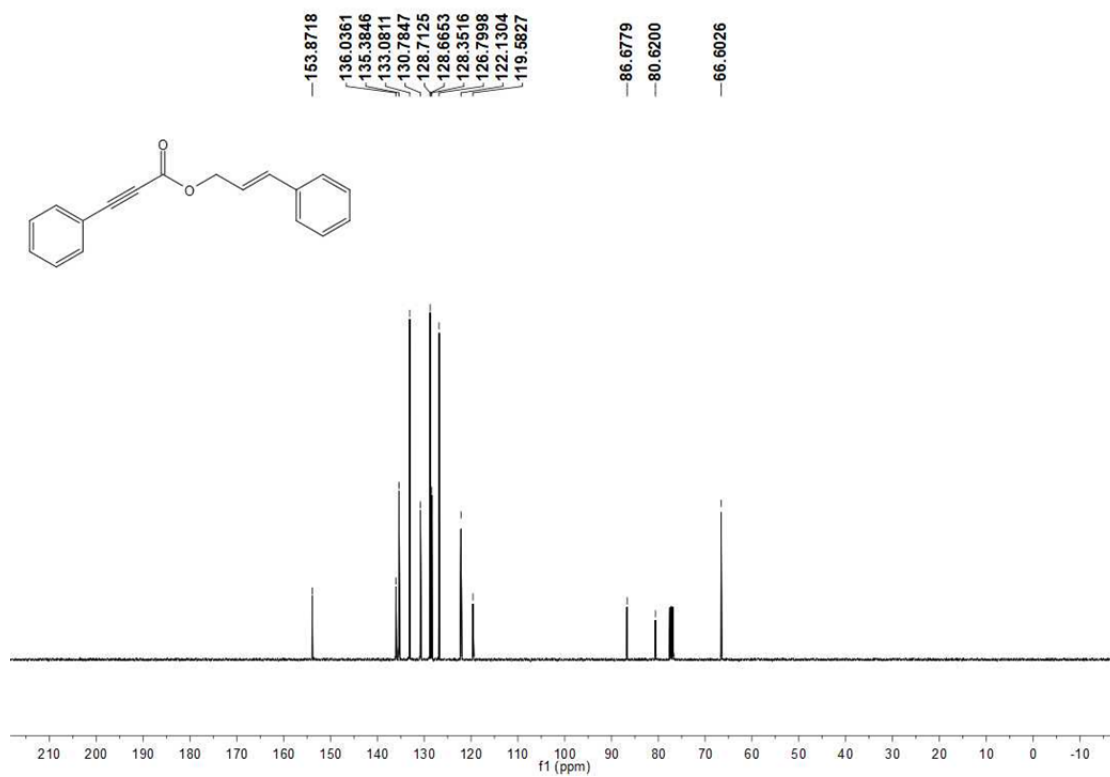

Fig. S64  $^{13}\text{C}$   $\{^1\text{H}\}$  NMR spectrum of 7c in  $\text{CDCl}_3$

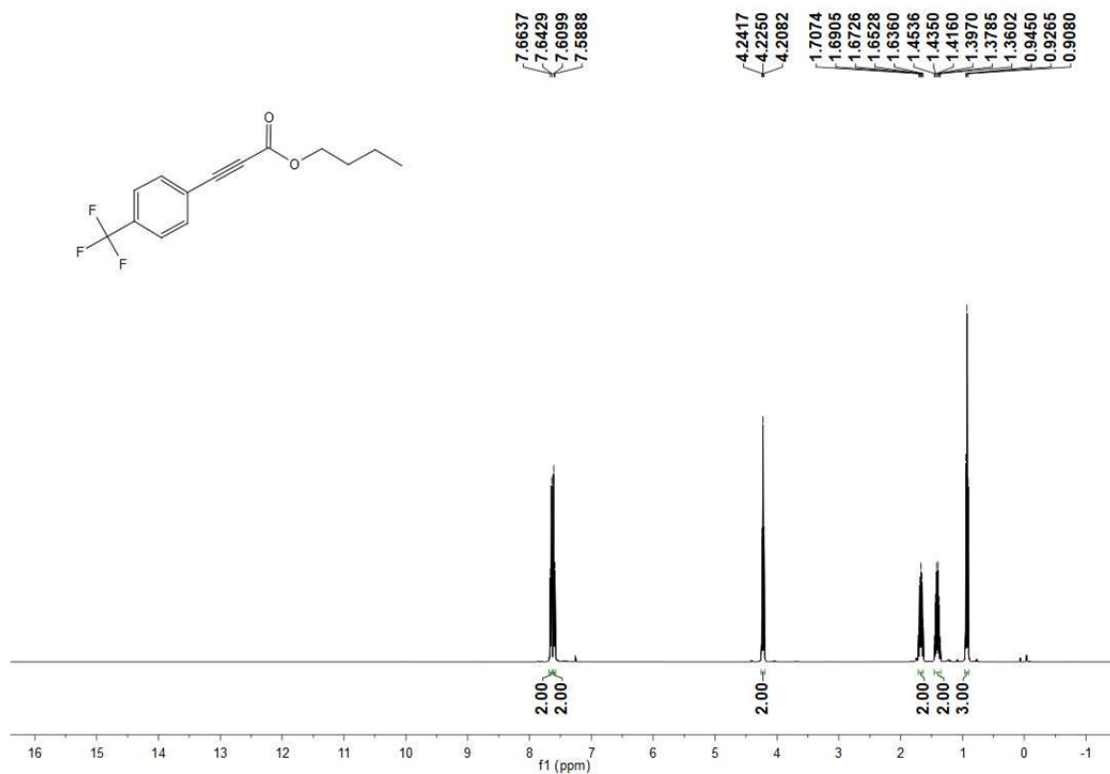

**Fig. S65**  $^1\text{H}$  NMR spectrum of **7d** in  $\text{CDCl}_3$

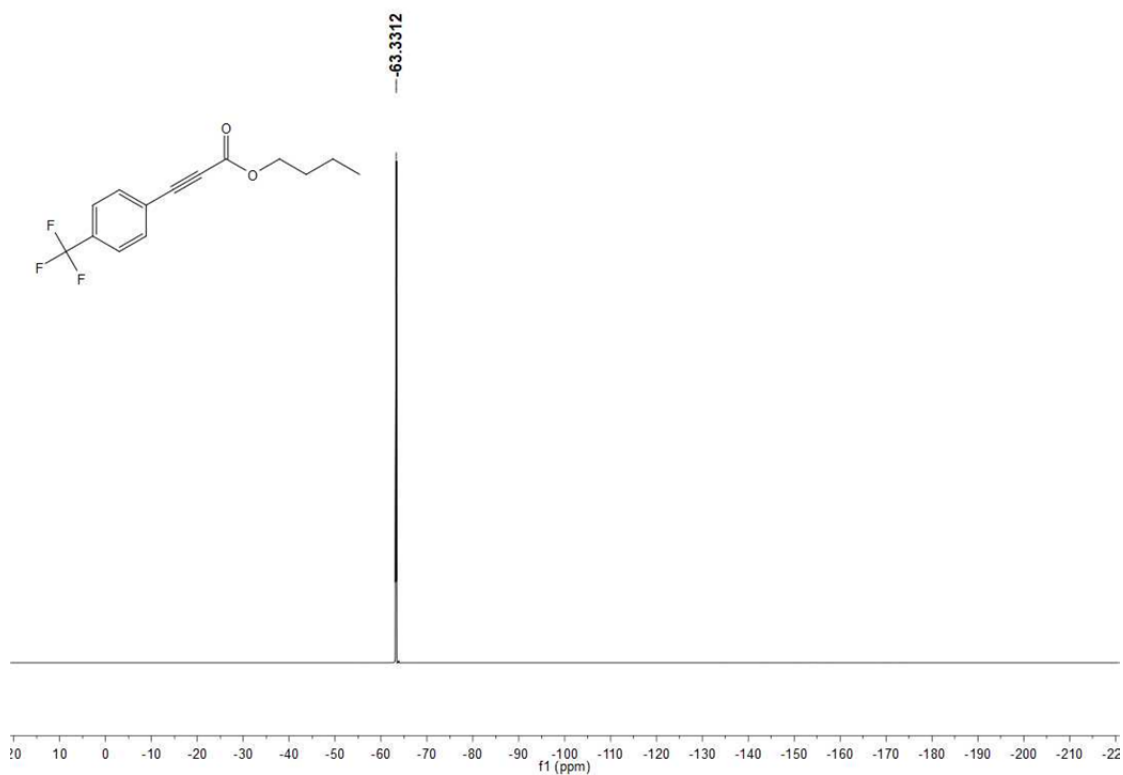

**Fig. S66**  $^{19}\text{F}$  NMR spectrum of **7d** in  $\text{CDCl}_3$

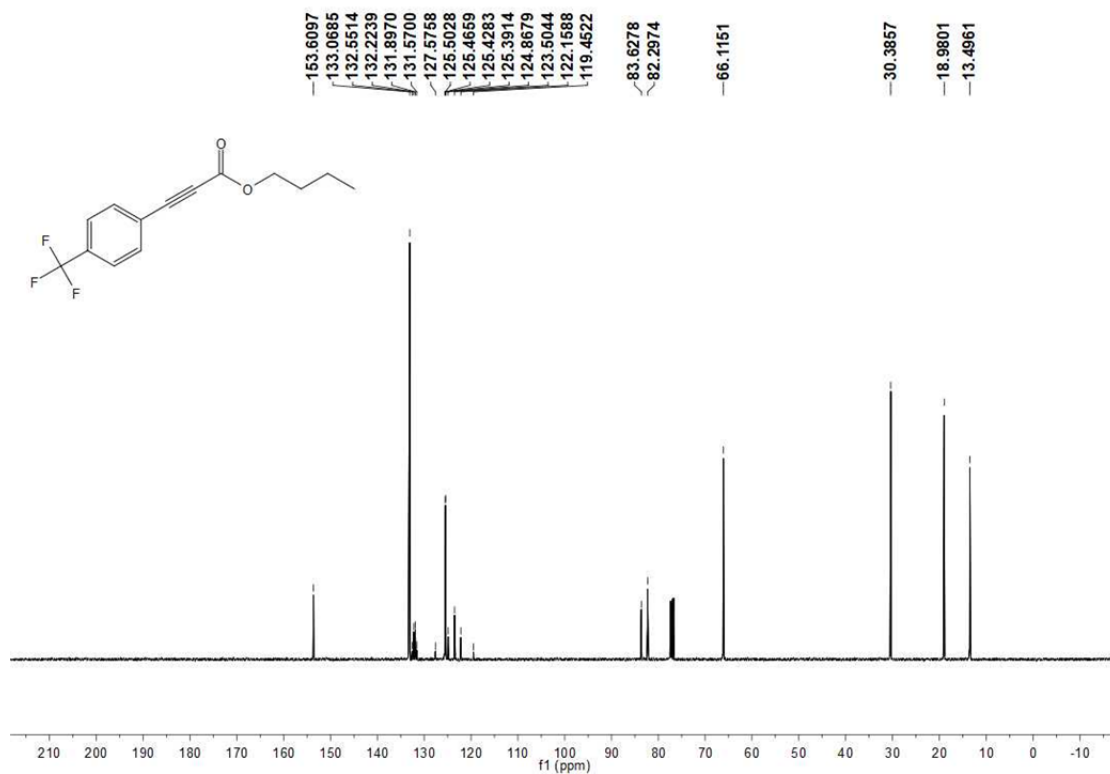

**Fig. S67**  $^{13}\text{C}\{^1\text{H}\}$  NMR spectrum of **7d** in  $\text{CDCl}_3$

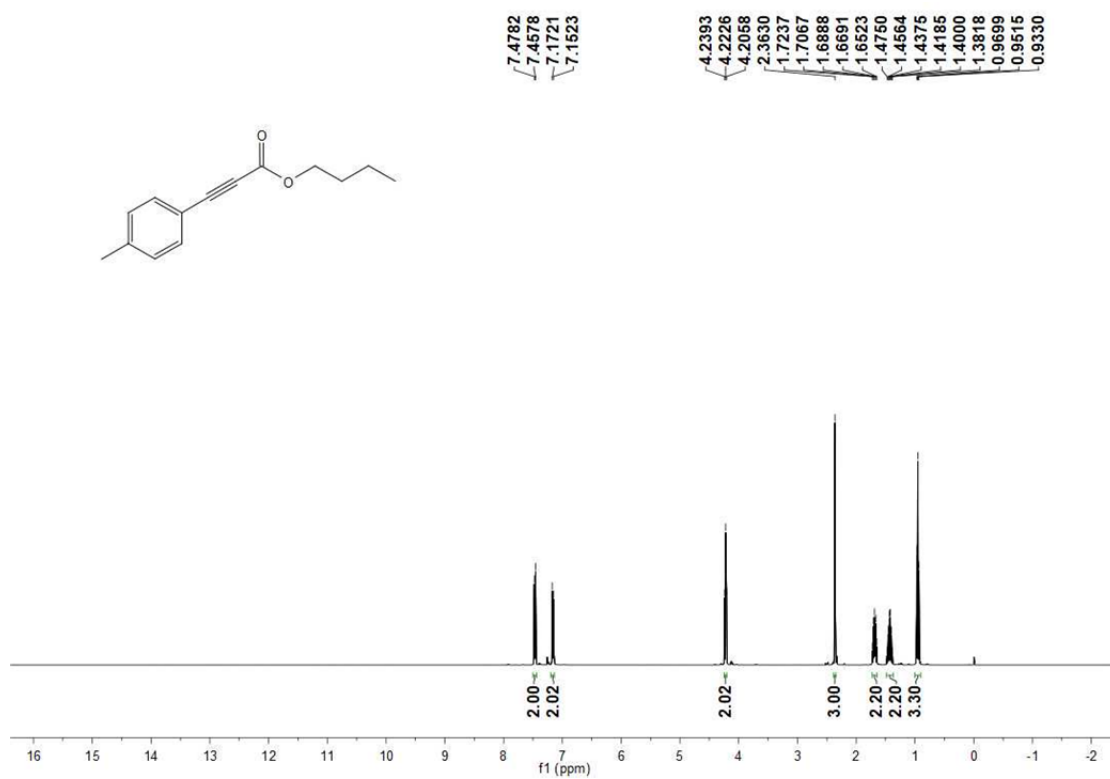

**Fig. S68**  $^1\text{H}$  NMR spectrum of **7e** in  $\text{CDCl}_3$

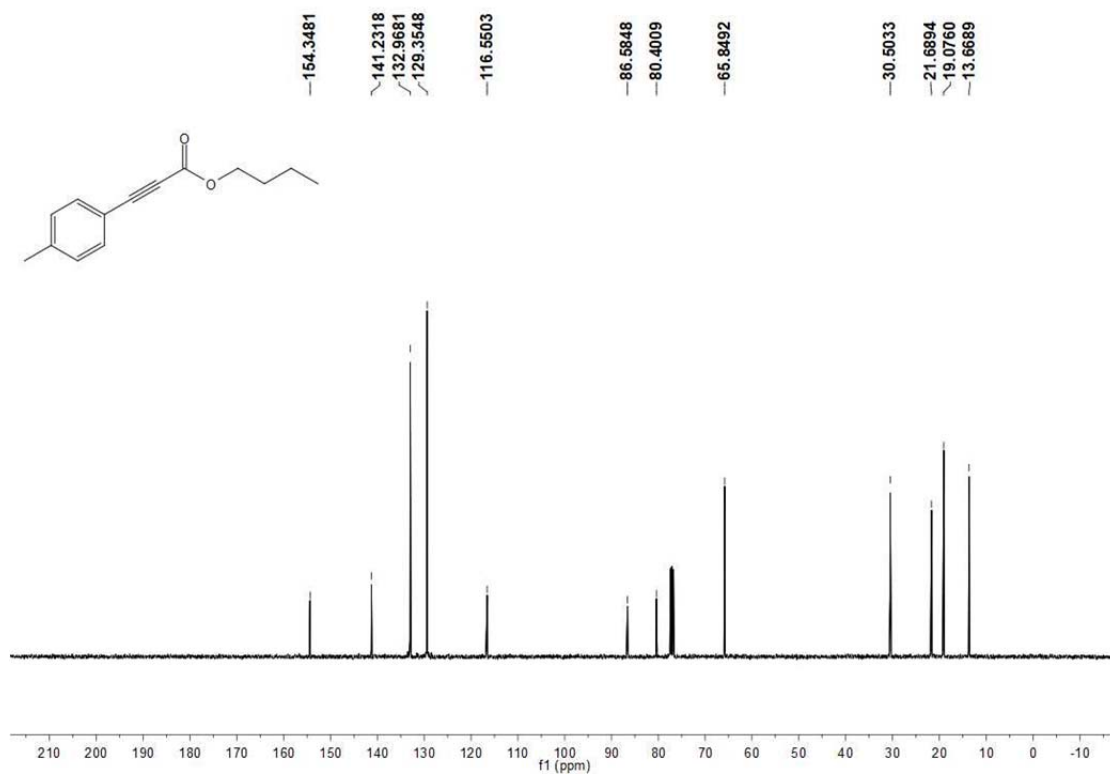

Fig. S69  $^{13}\text{C}\{^1\text{H}\}$  NMR spectrum of 7e in  $\text{CDCl}_3$

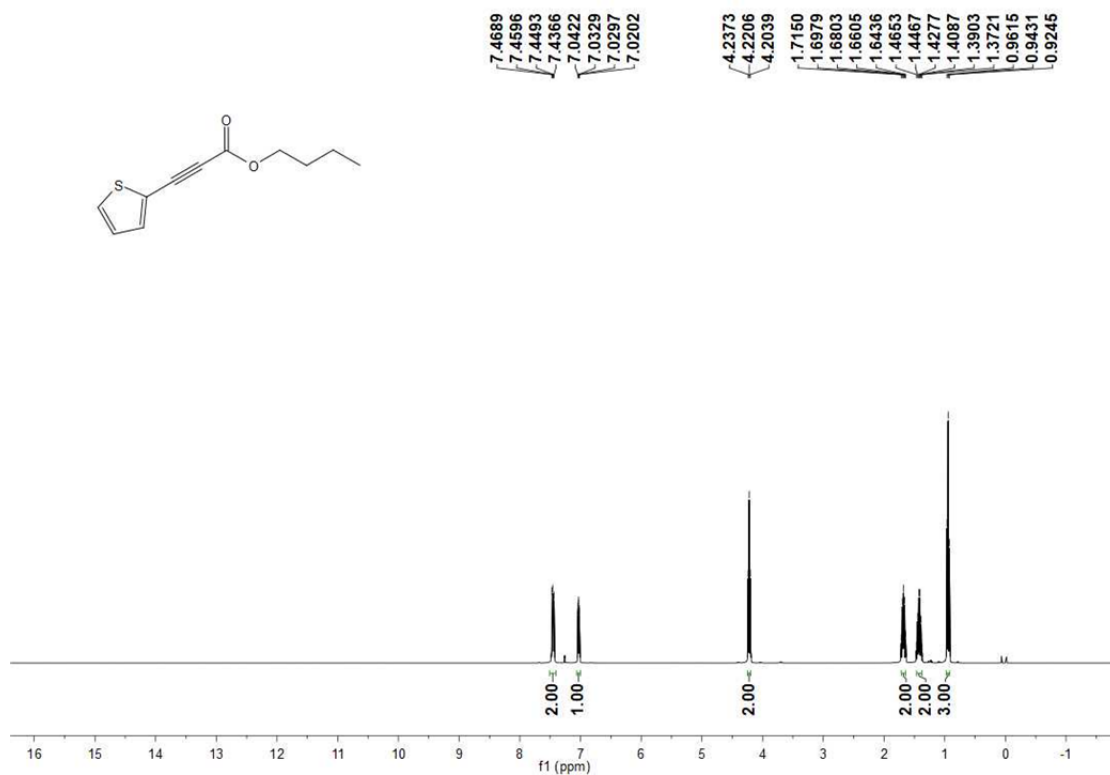

Fig. S70  $^1\text{H}$  NMR spectrum of 7f in  $\text{CDCl}_3$



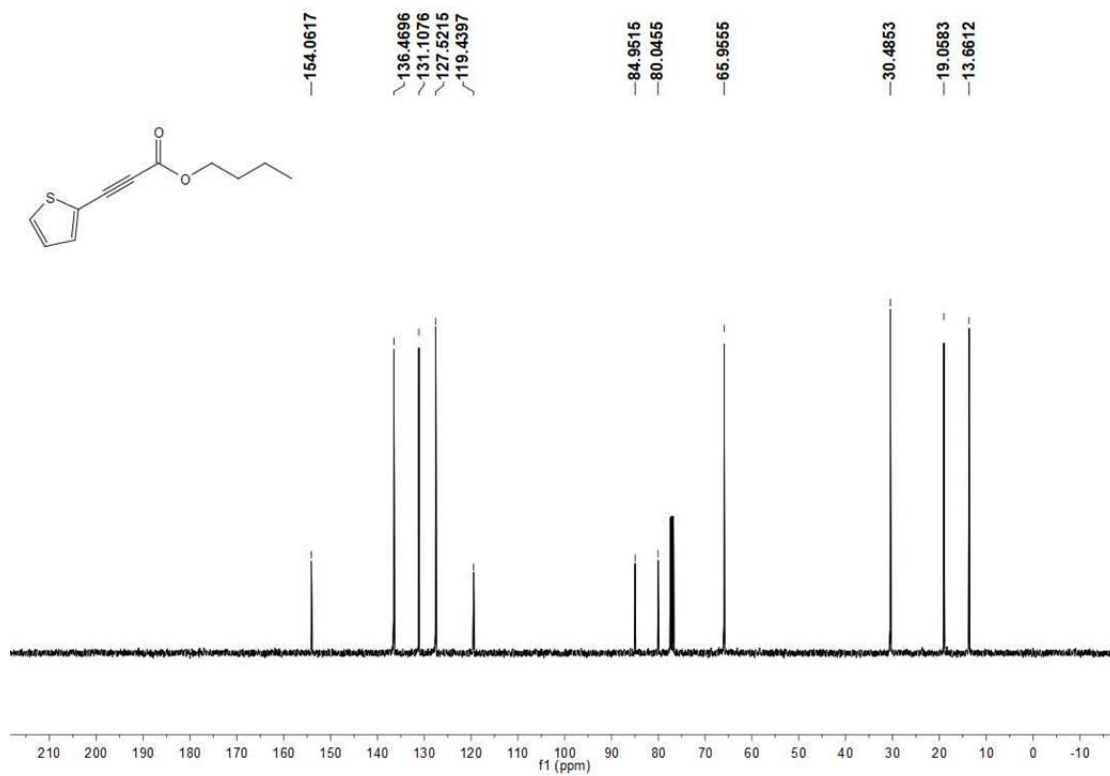

**Fig. S71**  $^{13}\text{C}\{^1\text{H}\}$  NMR spectrum of **7f** in  $\text{CDCl}_3$

## References

- (1) Yao, H.; Zhang, Y.; Sun, H.; Shen, Q. Anionic Lanthanide Complexes Bearing a Bis(Phenoxy)-Functionalized *N*-Heterocyclic Carbene Ligand: Syntheses and Molecular Structures. *Eur. J. Inorg. Chem.* **2009**, 1920–1925.
- (2) Deng, H. N.; Xing, Y. L.; Xia, C. L.; Sun, H. M.; Shen, Q.; Zhang, Y. Ionic Iron(III) Complexes of Bis(Phenol)-Functionalized Imidazolium Cations: Synthesis, Structures and Catalysis for Aryl Grignard Cross-Coupling of Alkyl Halides. *Dalton Trans.* **2012**, *41*, 11597–11607.
- (3) Xia, C. L.; Xie, C. F.; Wu, Y. F.; Sun, H. M.; Shen, Q.; Zhang, Y. Efficient Cross-Coupling of Aryl Grignard Reagents with Alkyl Halides by Recyclable Ionic Iron(III) Complexes Bearing a Bis(Phenol)-Functionalized Benzimidazolium Cation. *Org. Biomol. Chem.* **2013**, *11*, 8135–8144.
- (4) Shi, J. Bin; Bu, Q.; Liu, B. Y.; Dai, B.; Liu, N. Organocatalytic Strategy for the Fixation of CO<sub>2</sub> via Carboxylation of Terminal Alkynes. *J. Org. Chem.* **2021**, *86*, 1850–1860.
- (5) Yu, B.; Yang, P.; Gao, X.; Yang, Z.; Zhao, Y.; Zhang, H.; Liu, Z. Sequential Protocol for C(sp)<sup>3</sup>-H Carboxylation with CO<sub>2</sub>: KO<sup>t</sup>Bu-Catalyzed C(sp)<sup>3</sup>-H Silylation and KO<sup>t</sup>Bu-Mediated Carboxylation. *Sci. China Chem.* **2018**, *61*, 449–456.
- (6) Papastavrou, A. T.; Pauze, M.; Gómez-Bengoa, E.; Vougioukalakis, G. C. Unprecedented Multicomponent Organocatalytic Synthesis of Propargylic Esters via CO<sub>2</sub> Activation. *ChemCatChem* **2019**, *11*, 5379–5386.
- (7) Bondarenko, G. N.; Dvurechenskaya, E. G.; Magommedov, E. S.; Beletskaya, I. P. Copper(0) Nanoparticles Supported on Al<sub>2</sub>O<sub>3</sub> as Catalyst for Carboxylation of Terminal Alkynes. *Catal. Lett.* **2017**, *147*, 2570–2580.
